# Supplementary material for: Usefulness of ecological mobility and socio-economic indicators in SARS-CoV-2 infection modelling: a French case study
Source: bioRxiv or medRxiv preprint supplement (doi:10.1101/2024.05.05.24306895), 2024-05-06
Supplement: Supplementary file [file media-1.zip]

## General model specification

In the present report, the following model was used to assess the relationship between the aggregated case count of SARS-CoV-2 infection and covariates, accounting for spatial effects:

$$Y_k \sim \text{Pois}(\lambda_k) \quad (1)$$

$$\log(\lambda) = \boldsymbol{\mu} + \mathbf{X}\boldsymbol{\beta} + \boldsymbol{\phi} \quad (2)$$

$$\boldsymbol{\phi} | \mathbf{W}, \tau^2, \rho \sim N(0; \tau^2 [\rho \mathbf{W} + (1 - \rho) \mathbf{I}_K]^{-1}) \quad (3)$$

With  $\lambda$  the vector of  $\lambda_k$  the expected count for unit  $k$ ,  $\boldsymbol{\beta}$  the vector of covariate parameters of length  $p$ ,  $\mathbf{X}$  the covariate matrix of dimensions  $p \times K$ ,  $k \in \{1, \dots, K\}$  index of a given spatial unit,  $\phi_k$  element  $k$  of  $\boldsymbol{\phi}$  the vector of random spatial effect,  $w_{kj}$  row of  $\mathbf{W}$  the spatial weight matrix of dimensions  $K \times K$ ,  $\tau^2$  the variance weighting parameter,  $\rho$  the spatial correlation coefficient,  $\mathbf{I}_K$  the identity matrix. In the present report, we refer to the  $\mathbf{X}\boldsymbol{\beta}$  component as the covariate component, and  $\boldsymbol{\phi}$  as the spatial effect component.

## Fixed effects formula

The  $\mathbf{X}\boldsymbol{\beta}$  component introduced in Equation 2 in the main body of this report can be detailed as such, for one spatial unit  $k$ :

$$\begin{aligned} \mathbf{X}\boldsymbol{\beta} = & \beta_1 \ln(\text{population}) + \beta_2 \ln^2(\text{population}) + \beta_3 \ln^3(\text{population}) + \beta_4 \ln^4(\text{population}) \\ & + \beta_5 \ln^5(\text{population}) + \beta_6 I(\text{population.density.index} = 1) \\ & + \beta_7 \text{prop.migrant.indiv} + \beta_8 \text{prop.unemployed.indiv} \\ & + \beta_9 \text{prop.indiv.living.alone} \\ & + \beta_{10} \text{prop.indiv.working.outside.residency.town} \\ & + \beta_{11} \text{prop.indiv.going.work.by.car} + \beta_{12} \text{prop.families.without.child} \\ & + \beta_{13} \text{prop.car.ownership} + \beta_{14} \text{prop.indiv.under.high.school.diploma} \\ & + \beta_{15} \text{prop.overcrowded.homes} \end{aligned}$$

The choice of a degree 5 polynomial link between the logarithm of the population-at-risk and the logarithm of the expected number of cases was to attain a complete fitting with no functional form remaining for this specific variable and improve the estimations regarding the other covariates.

## Conditional autoregressive spatial effect

The Equation 3 in the main body introduces the prior for the CAR random effect as a multinomial law with a variance-covariance matrix equal to  $\tau^2 [\rho \mathbf{W} + (1 - \rho) \mathbf{I}_K]^{-1}$ . This random effect can also be specified in a conditional form, as  $\phi_k | \phi_{-k}$  with  $j \in -k = \{0, 1, \dots, k-1, k+1, \dots, K\}$  designating respectively a unit  $j$  which is not the unit  $k$  and  $-k$  the set of indices of all units except  $k$ .

$$\phi_k | \phi_{-k}, w_{kj}, \tau^2, \rho \sim N \left( \frac{\rho \sum_{j \in -k} \phi_j w_{kj}}{\rho \sum_{j \in -k} w_{kj} + 1 - \rho}; \frac{\tau^2}{\rho \sum_{j \in -k} w_{kj} + 1 - \rho} \right)$$

### Spatial weight matrix

Each cell  $w_{kj}$  of the spatial weight matrix  $\mathbf{W}$  of dimensions  $K \times K$  represents the proximity between a unit  $k$  and all others units  $j \in -k$  with regards to the random spatial effect. Each  $w_{kj}$  was computed using an inverse travel-time metric as such:

$$w_{kj}^* = \begin{cases} \frac{1}{t_{kj}}, & t_{kj} < 60 \\ 0, & otherwise \end{cases}$$

$$w_{kj} = \frac{w_{kj}^*}{\sum_k \sum_j w_{kj}^*}$$

with  $t_{kj}$  the travel time in minutes between the centroids of unit  $k$  and unit  $j$ . This provided a total normalized weight matrix  $\mathbf{W}$  where all row sums are distributed around 1 and symmetry is preserved, which is a computational constraint of the package CARBayes. This also allows a moderately homogeneous interpretation of the parameter  $\tau^2$  which must be interpreted for each spatial unit  $k$  with respect to the respective  $\mathbf{W}$  row sum:  $\sum_{j \in -k} w_{kj}$ .

Travel time between centroids was computed using the Conveyal R5 routing engine (1–4), interfaced with R software through the r5r package (5). Three modes of travel were considered to assess a minimal travel time: bicycle, car, and public transit of all type. The OpenStreetMap geographic dataset was used to provide relevant network information to the travel time matrix computing (6).

### Performance metrics

The McFadden pseudo- $R^2$  is defined as:

$$R^2 = 1 - \frac{\log \hat{L}(M_i)}{\log \hat{L}(M_1)}$$

with  $M_i$  the evaluated model,  $M_1$  the reference model for computation, and  $\hat{L}$  the estimated likelihood.

The Moran's  $I$  index quantifying the residual influence of units  $j \in -k$  upon unit  $k$  is computed following the equation:

$$I = \frac{K}{\sum_k \sum_j w_{kj}} \frac{\sum_k \sum_j w_{kj} (\epsilon_k - \bar{\epsilon})(\epsilon_j - \bar{\epsilon})}{\sum_k \sum_j (\epsilon_k - \bar{\epsilon})^2}$$

with  $\epsilon_k$  the Pearson standardized residuals.

1. Conway MW, Byrd A, Eggermond M van. Accounting for uncertainty and variation in accessibility metrics for public transport sketch planning. *J Transp Land Use* [Internet]. 2018 Jul 23 [cited 2022 Jul 27];11(1). Available from: <https://www.jtlu.org/index.php/jtlu/article/view/1074>
2. Conway MW, Byrd A, van der Linden M. Evidence-Based Transit and Land Use Sketch Planning Using Interactive Accessibility Methods on Combined Schedule and Headway-Based Networks. 2017 [cited 2022 Jul 27]; Available from: <https://keep.lib.asu.edu/items/127809>
3. Conway MW, Stewart AF. Getting Charlie off the MTA: a multiobjective optimization method to account for cost constraints in public transit accessibility metrics. *Int J Geogr Inf Sci*. 2019 Sep 2;33(9):1759–87.
4. Conveyal R5 Routing Engine [Internet]. Conveyal; 2022 [cited 2022 Jul 27]. Available from: <https://github.com/conveyal/r5>
5. Rafael H. M. Pereira, Marcus Saraiva, Daniel Herszenhut, Carlos Kaue Vieira Braga, Matthew Wigginton Conway. r5r: Rapid Realistic Routing on Multimodal Transport Networks with R5 in R. Findings. 2021;
6. OpenStreetMap contributors. France dump retrieved from <https://download.geofabrik.de/europe/france.html>. 2022.
