# Supplementary material for: Usefulness of ecological mobility and socio-economic indicators in SARS-CoV-2 infection modelling: a French case study
Source: bioRxiv or medRxiv preprint supplement (doi:10.1101/2024.05.05.24306895), 2024-05-06
Supplement: Supplementary file [file media-1.zip]

## Covariates definitions and description

Table 1: covariates labels and descriptions

| Covariate                                             | Shorthand            | Formula                                   | Definitions                                                                                                    | Map       |
|-------------------------------------------------------|----------------------|-------------------------------------------|----------------------------------------------------------------------------------------------------------------|-----------|
| Number of individuals at risk                         | Population           | <i>Population</i>                         |                                                                                                                | Figure 1  |
| Population density index (4 levels)                   | Density              | <i>Population.density.index</i>           | Cf. Table 1                                                                                                    | Figure 2  |
| % of immigrants                                       | % migrants           | Prop.migrant.indiv                        | Proportion of non French nationals over all inhabitants                                                        | Figure 3  |
| % of individuals unemployed                           | % unemployed         | Prop.unemployed.indiv                     | Proportion of unemployed individuals over all residents between 15 and 64                                      | Figure 4  |
| % of single person homes                              | % single             | Prop.indiv.living.alone                   | Proportion of homes with a single inhabitant over all homes                                                    | Figure 5  |
| % of individuals working outside their residency town | % out of resid. town | Prop.indiv.working.outside.residency.town | Proportion of individuals working outside of their residency town over all residents between 15 and 64         | Figure 6  |
| % of individuals travelling to work by car            | % work by car        | Prop.indiv.going.work.by.car              | Proportion of individuals travelling to work by car over all residents between 15 and 64                       | Figure 7  |
| % of families without a child                         | % no child           | Prop.families.without.child               | Proportion of families without a child over all families                                                       | Figure 8  |
| % of car ownership                                    | % own a car          | Prop.car.ownership                        | Proportion of homes possessing at least one car over all homes                                                 | Figure 9  |
| % of low education                                    | % low educ.          | Prop.indiv.under.high.school.diploma      | Proportion of individuals not in education without a high school diploma over all individuals not in education | Figure 10 |
| % of overpopulated homes                              | % overpop. home      | Prop.overcrowded.homes                    | Proportion of homes with more than one inhabitant for each room (excluding the bathroom) over all homes        | Figure 11 |

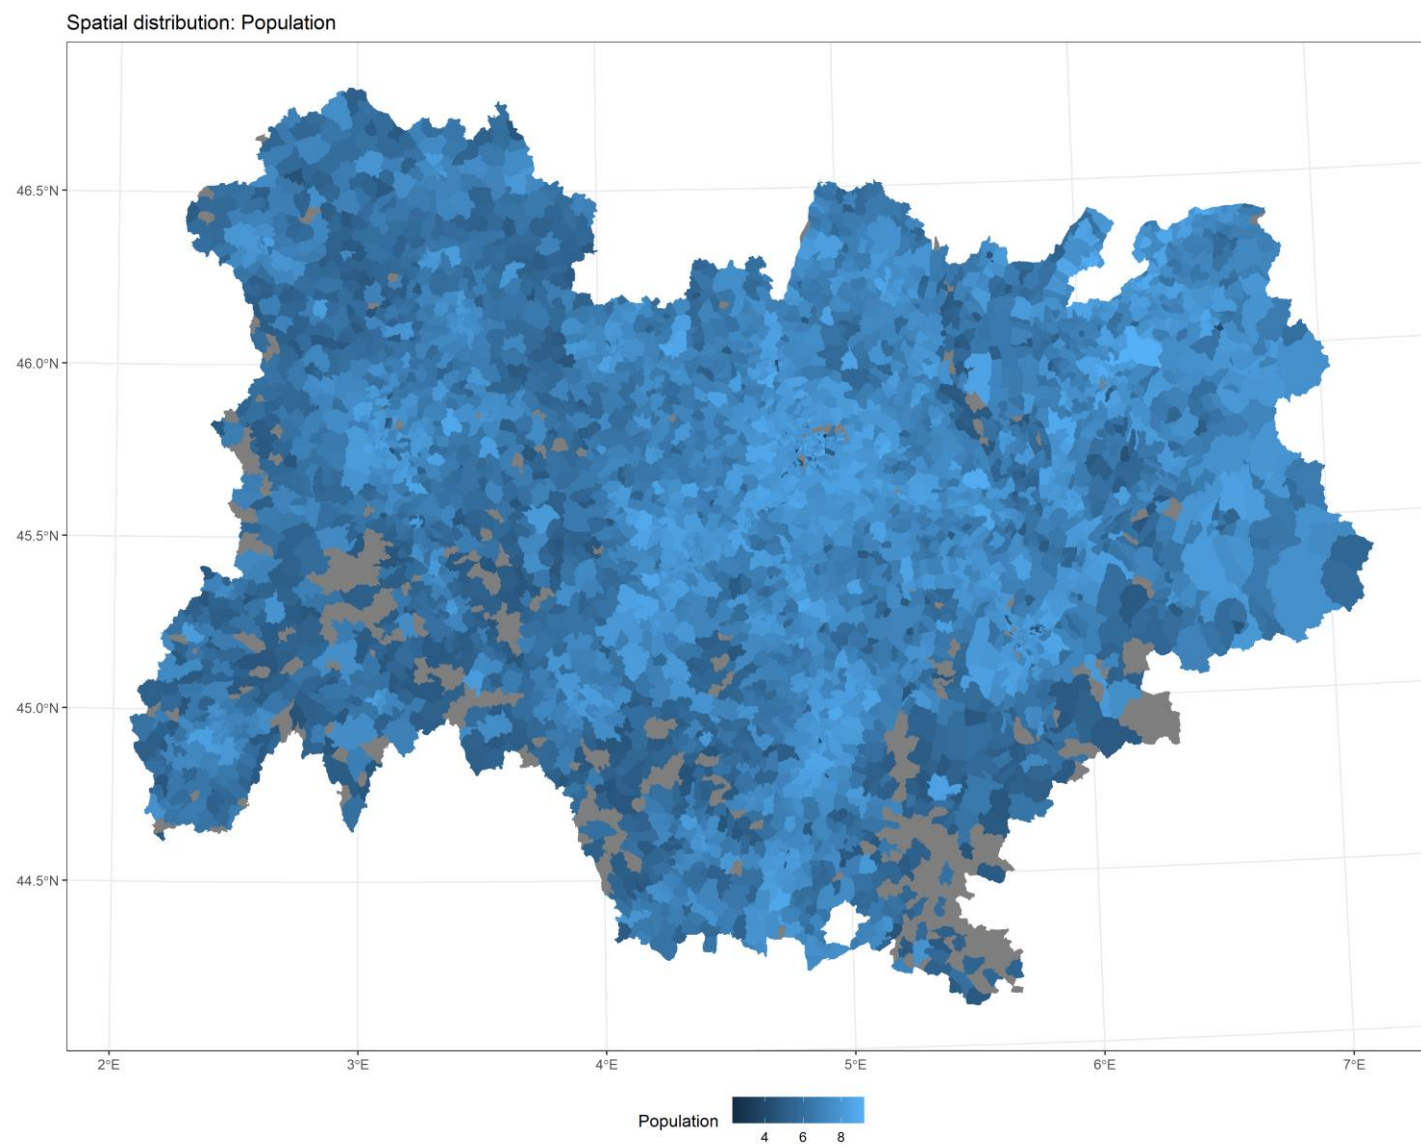

Figure 1

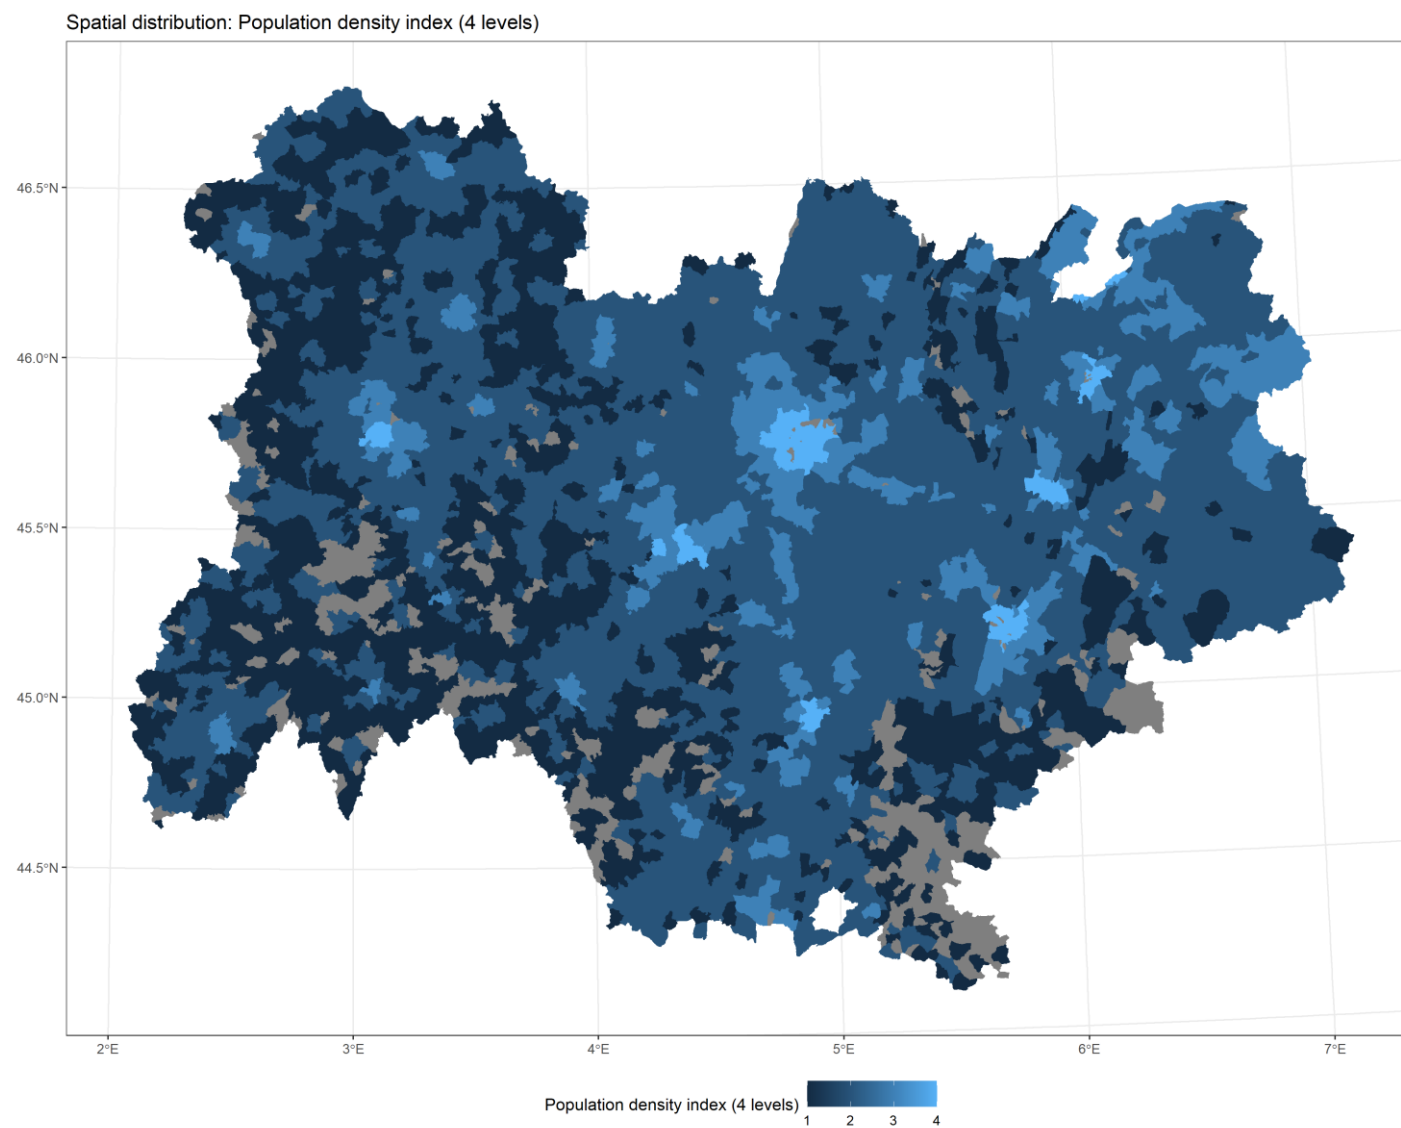

Figure 2

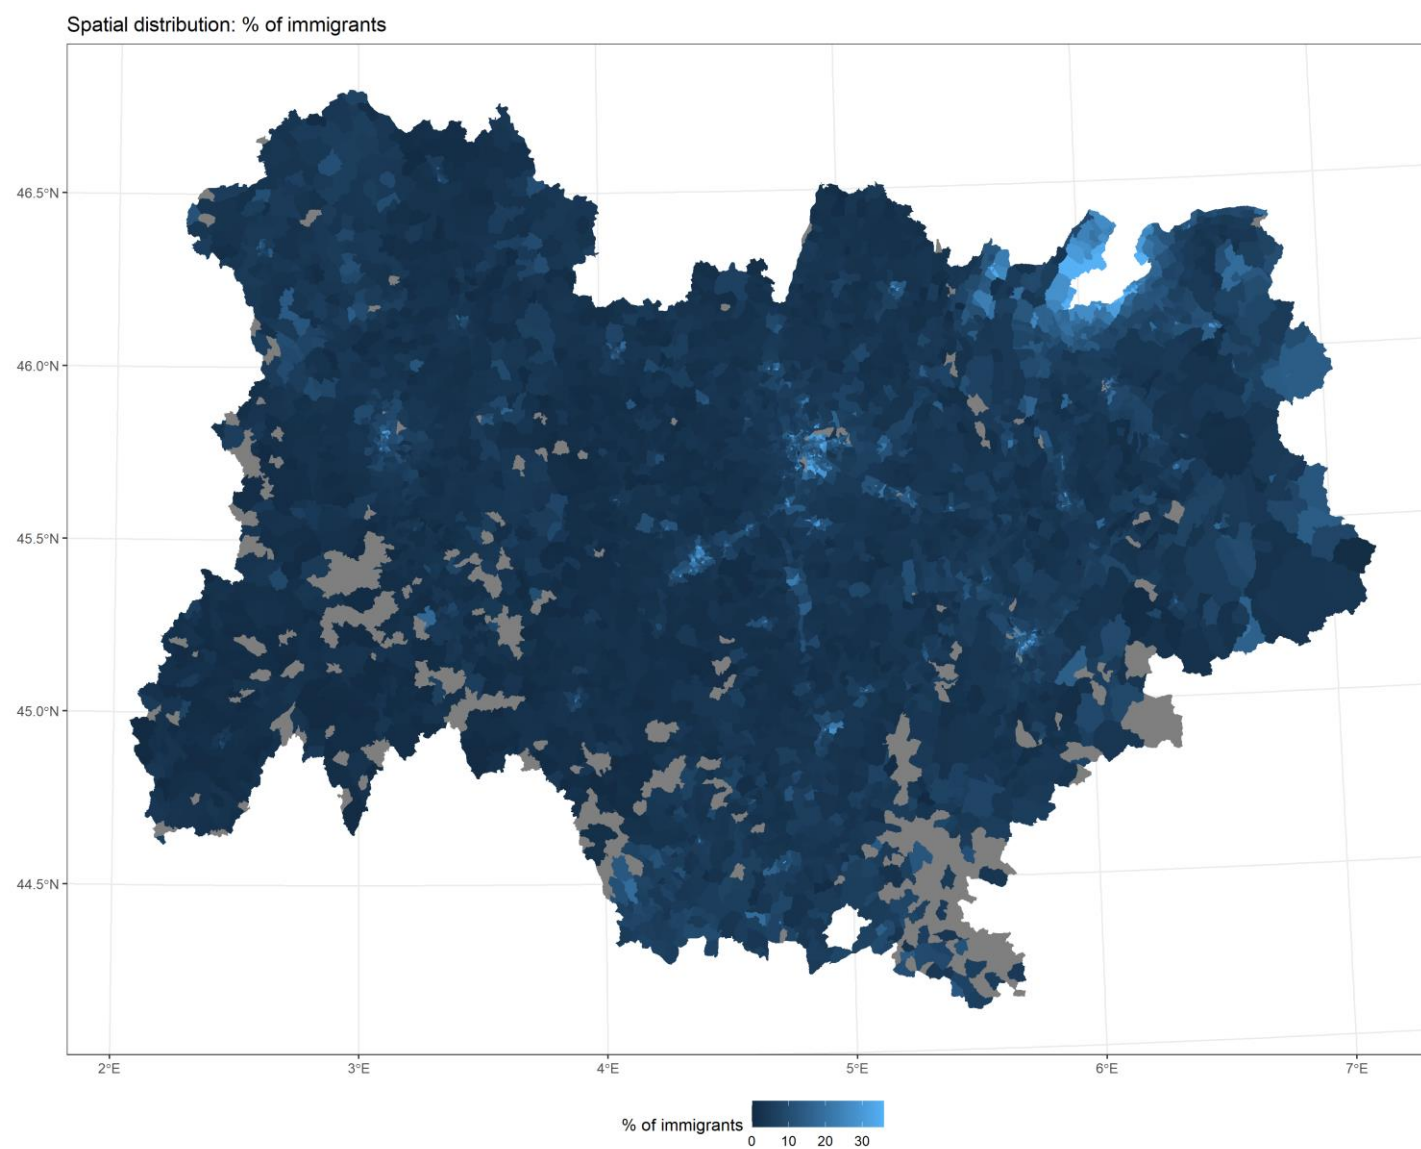

Figure 3

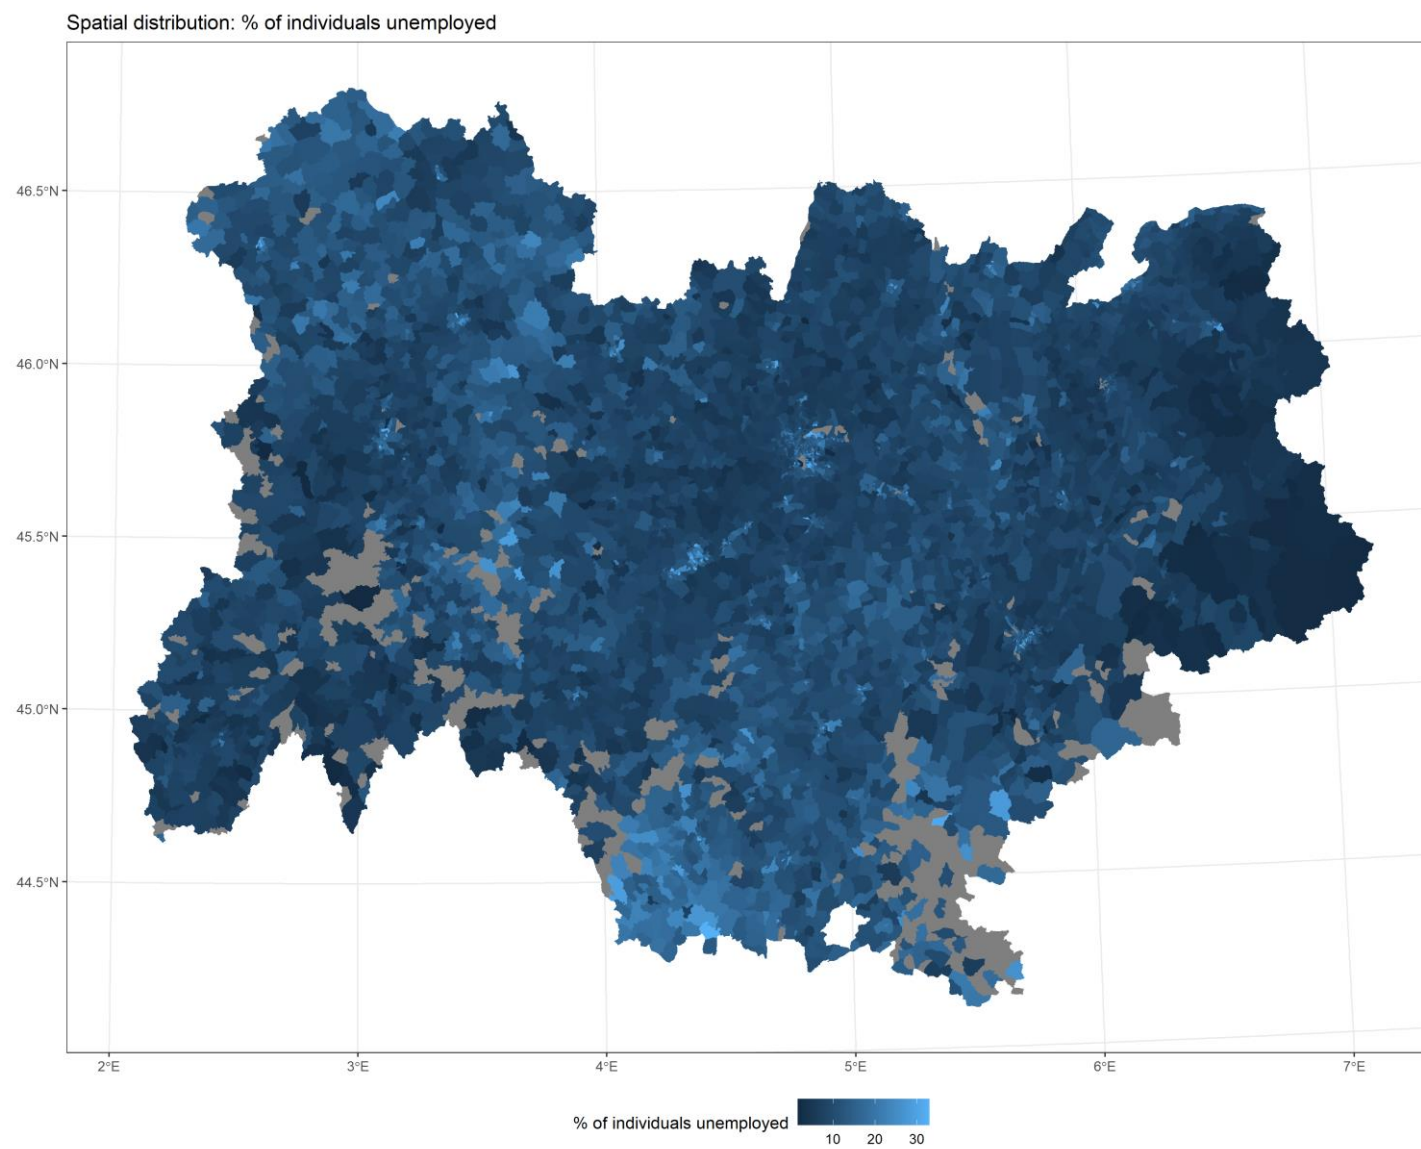

Figure 4



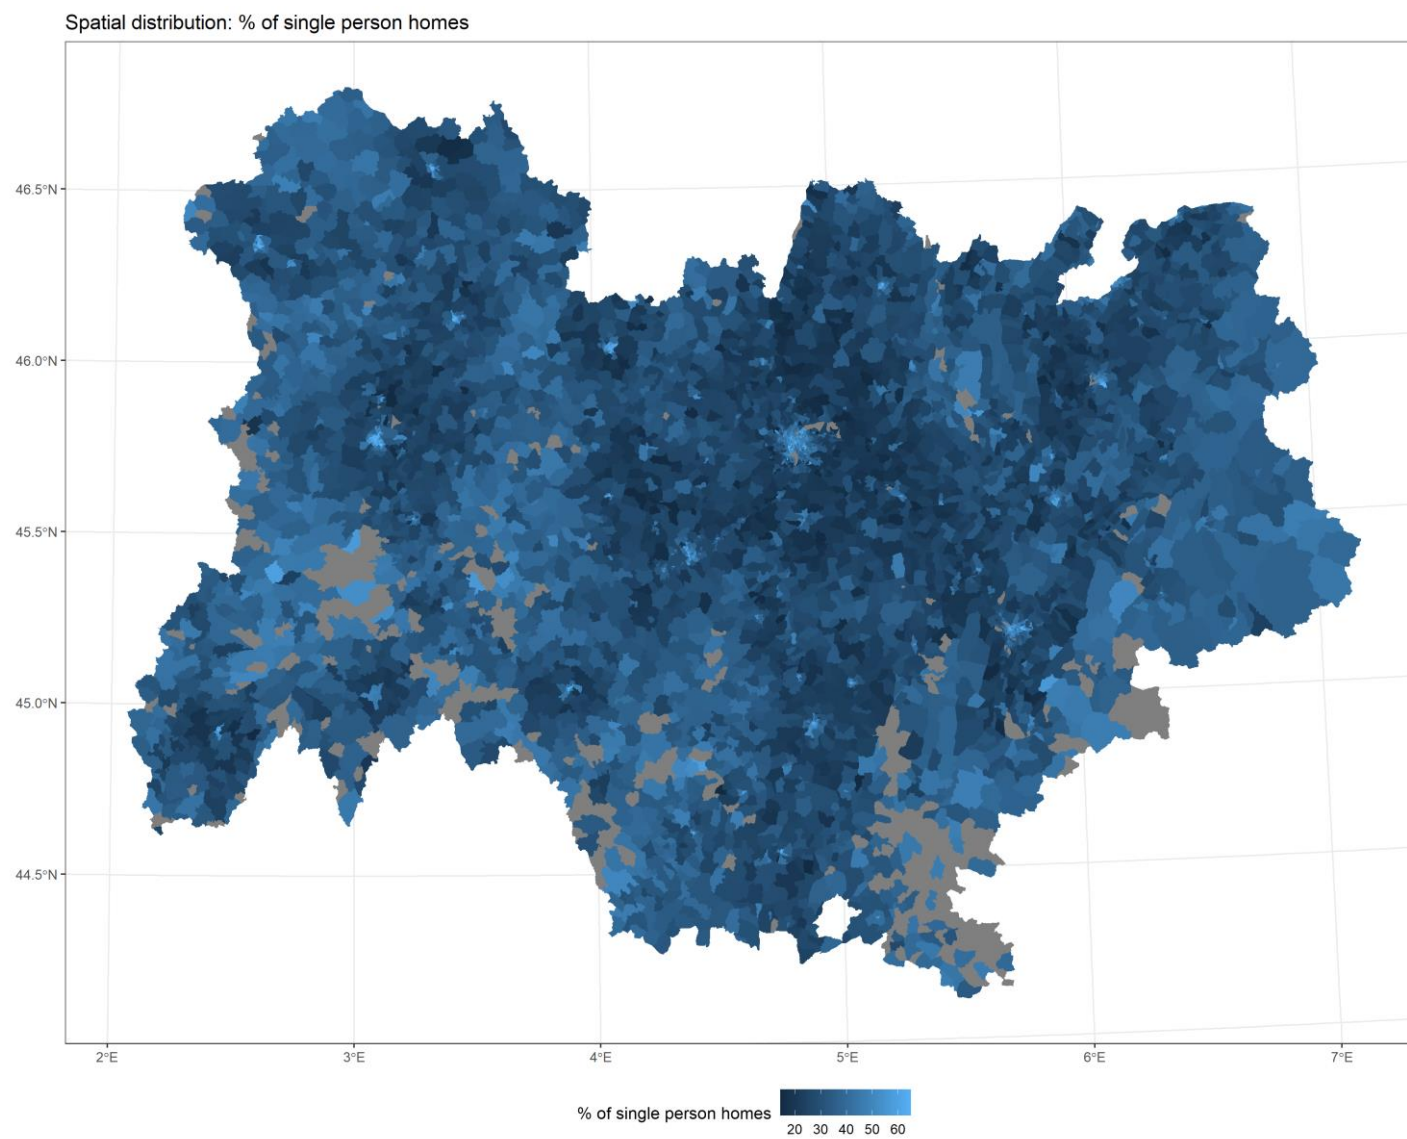

Figure 5

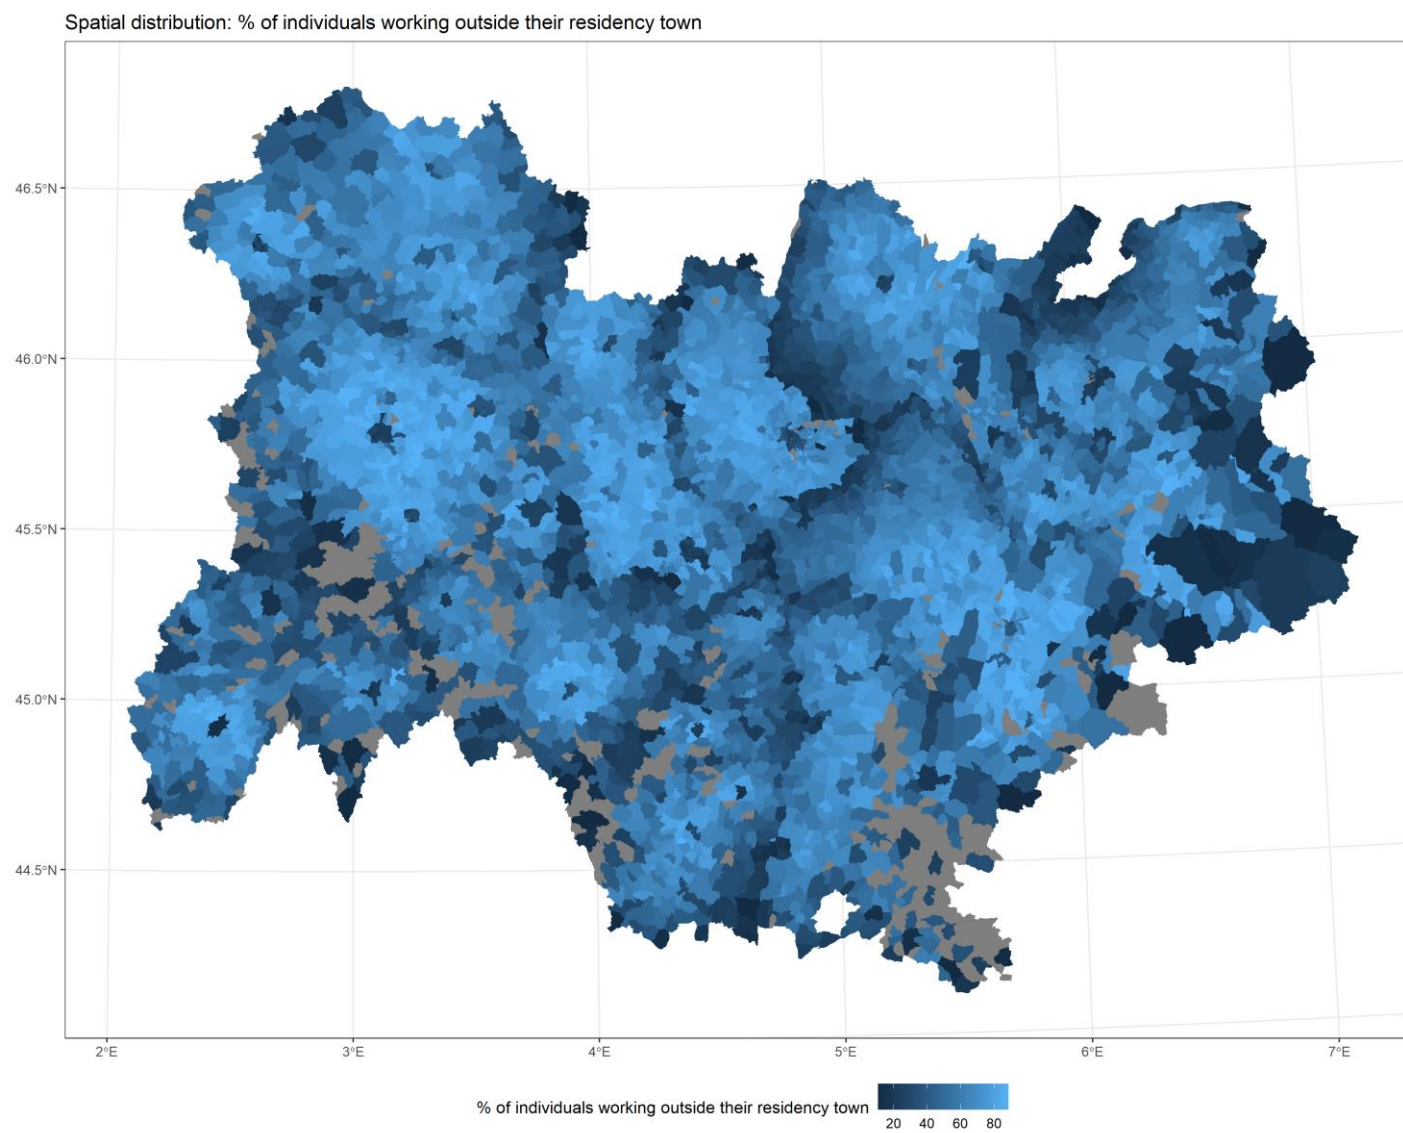

Figure 6

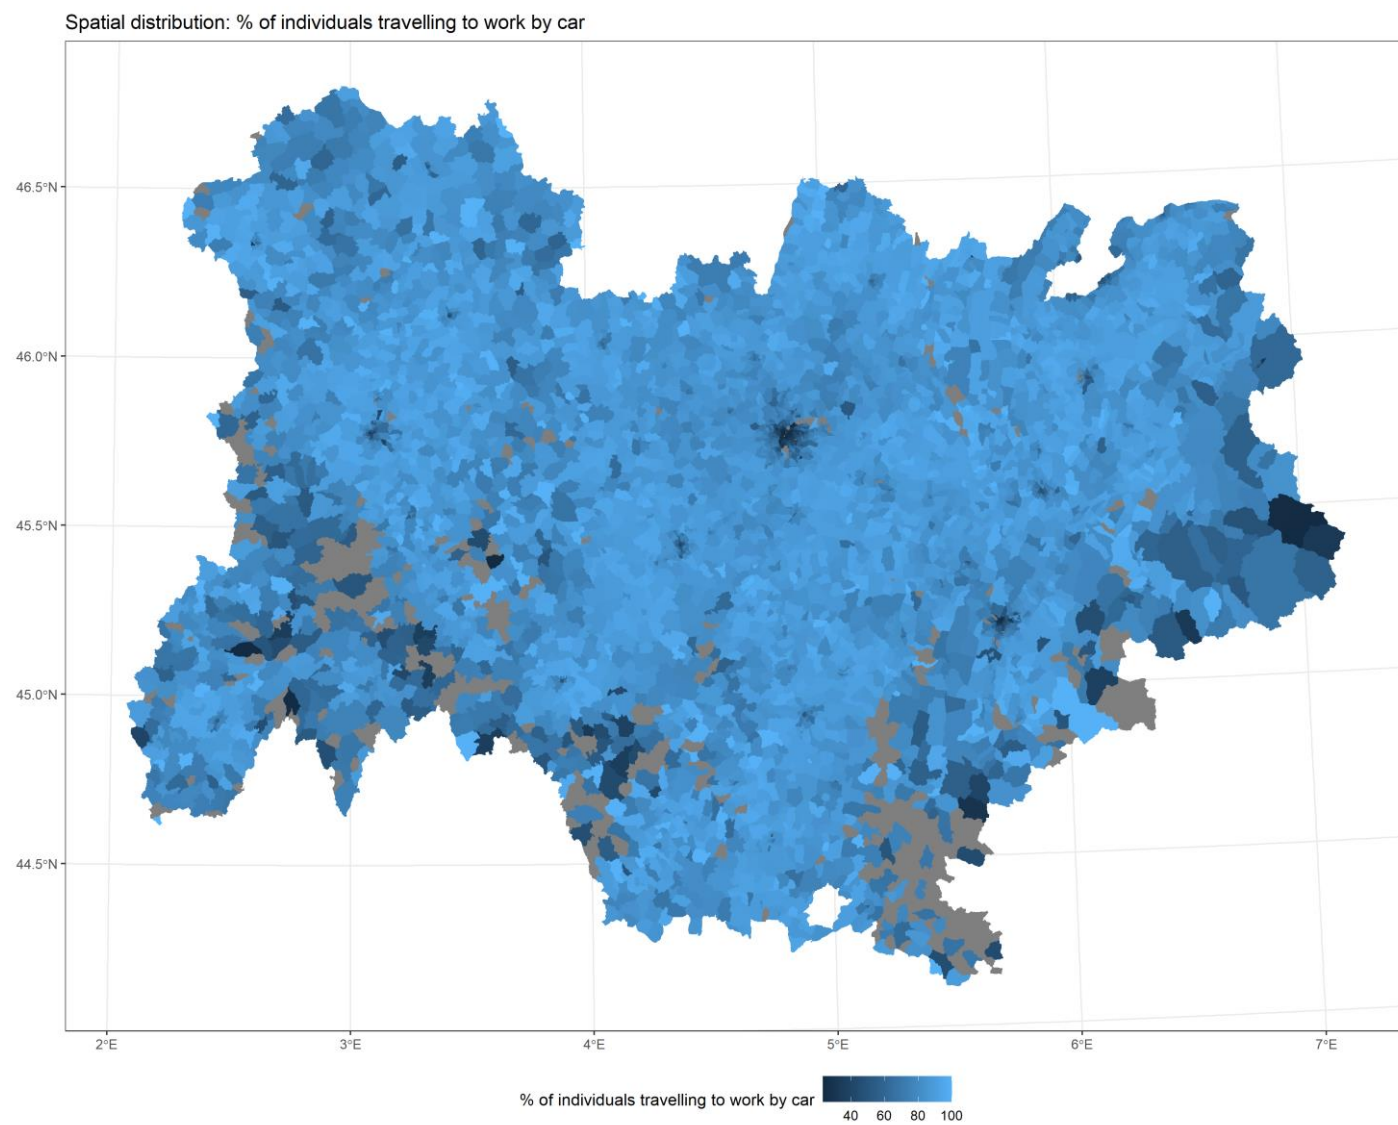

Figure 7



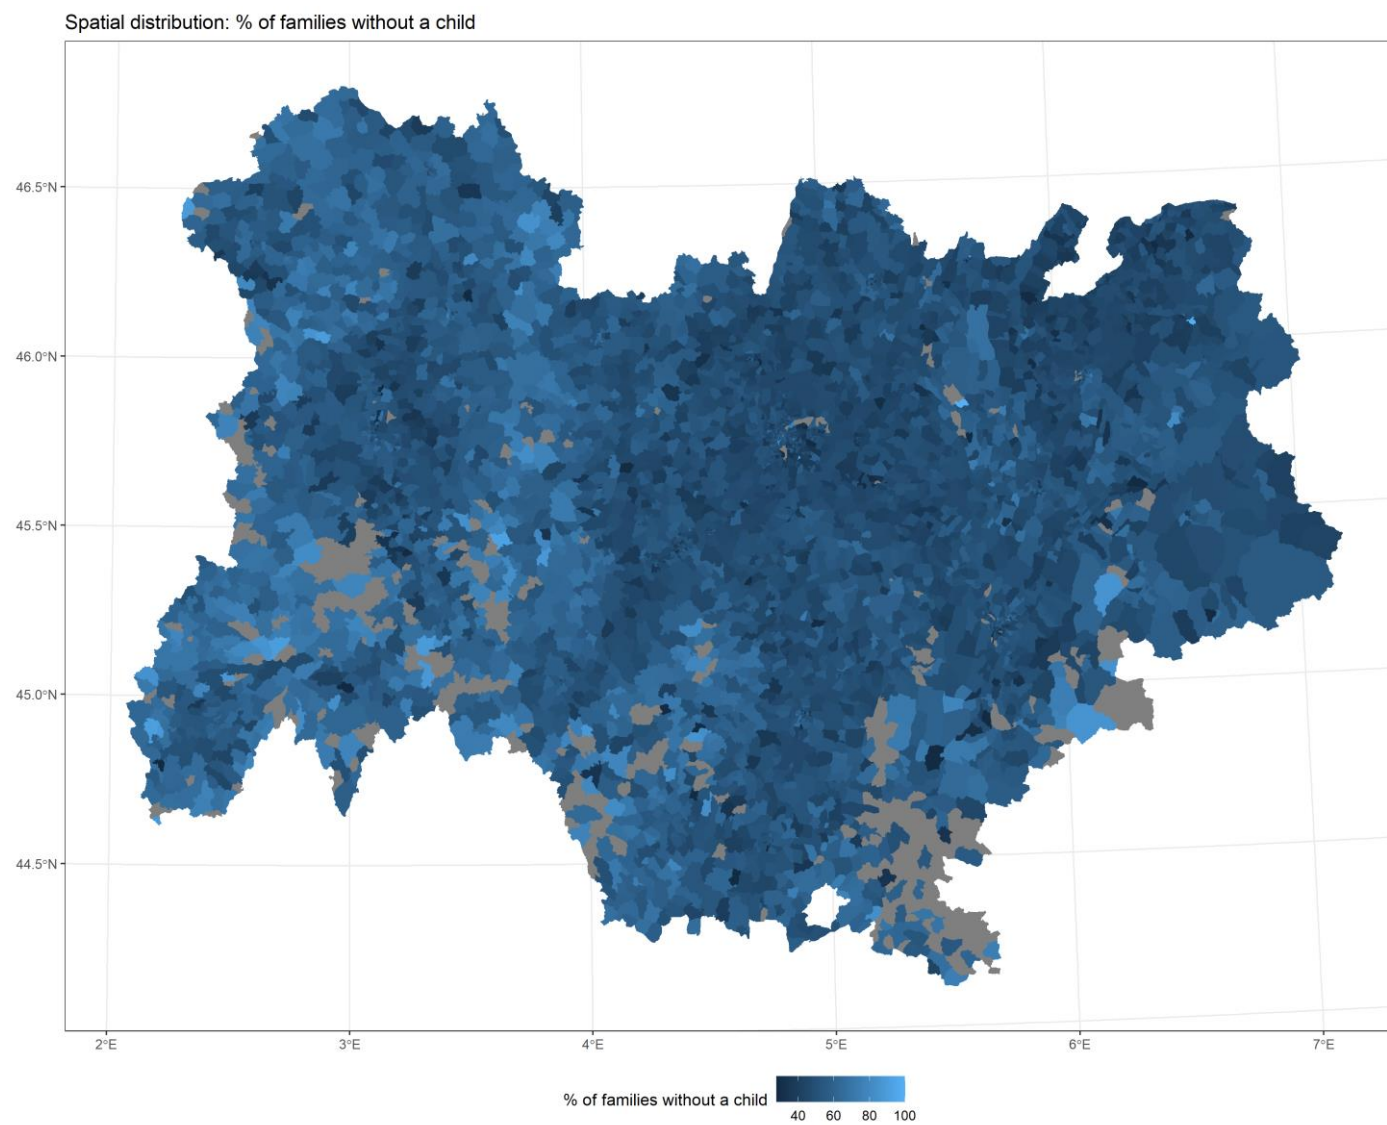

Figure 8

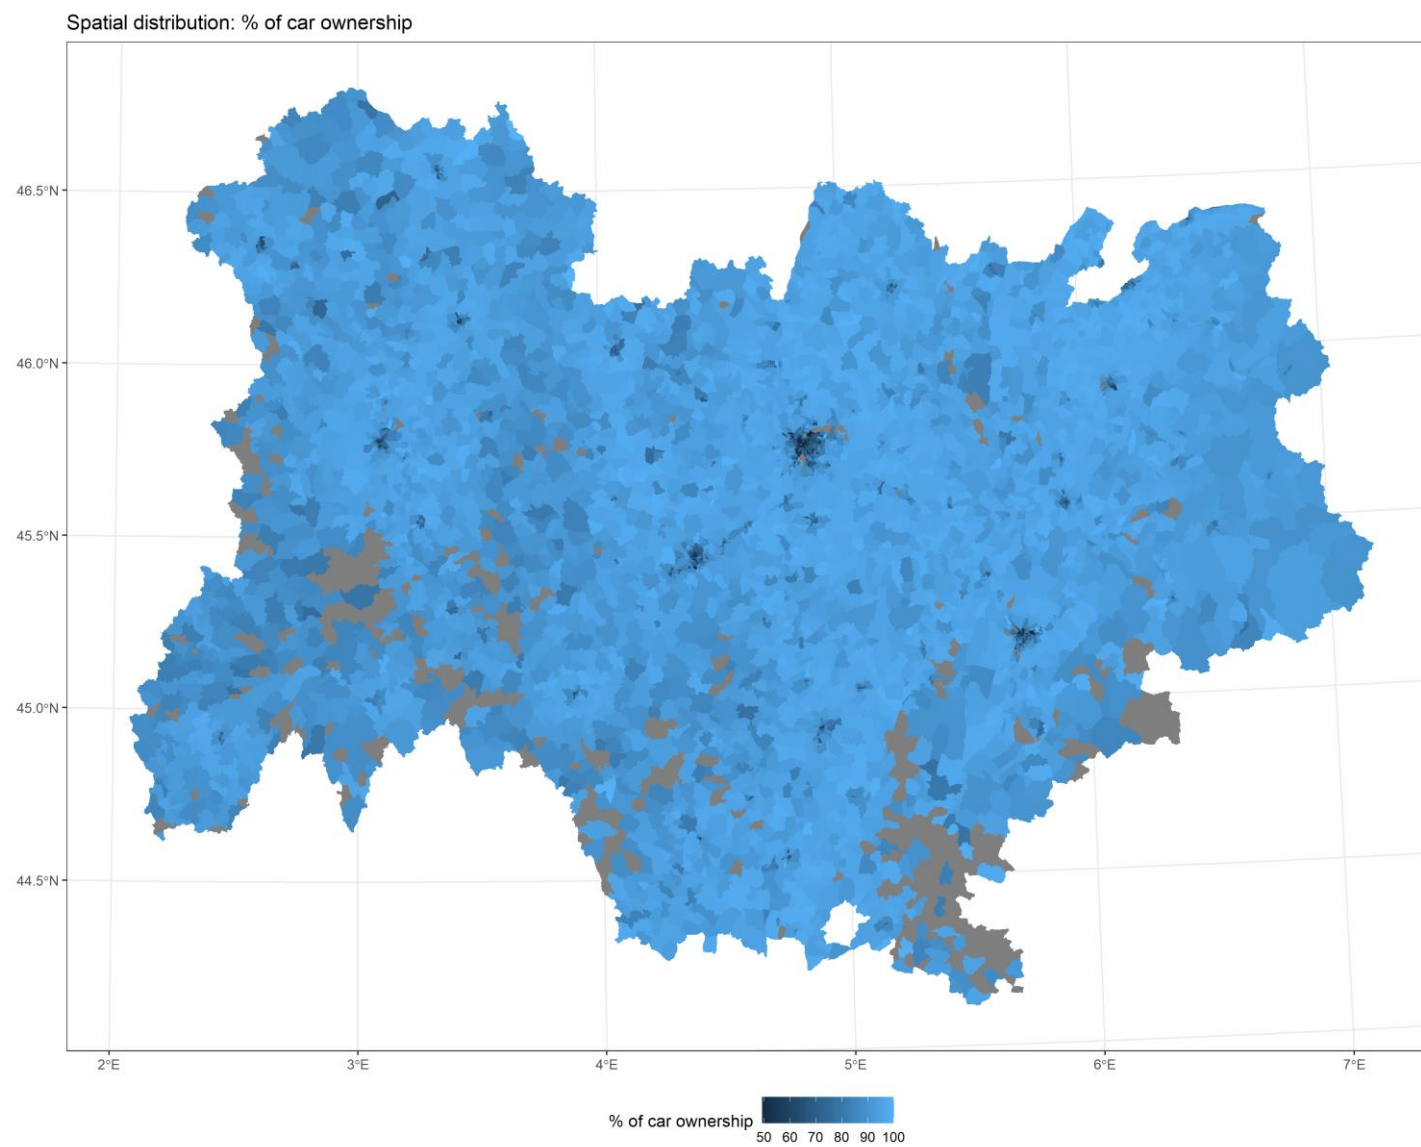

Figure 9

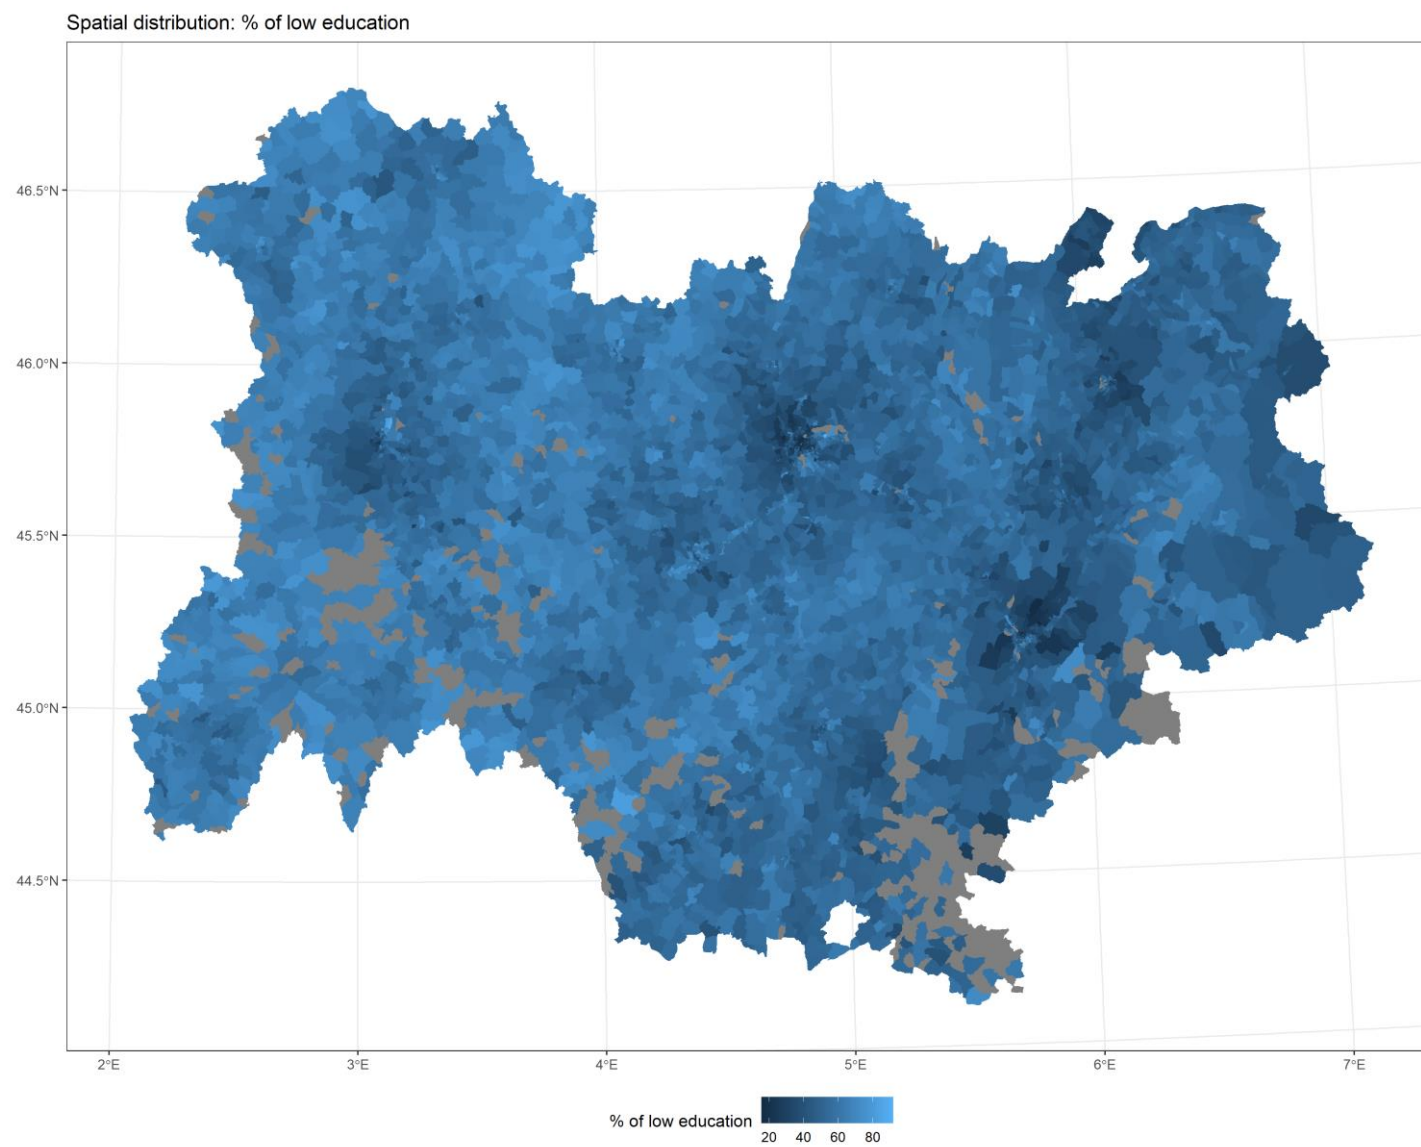

Figure 10

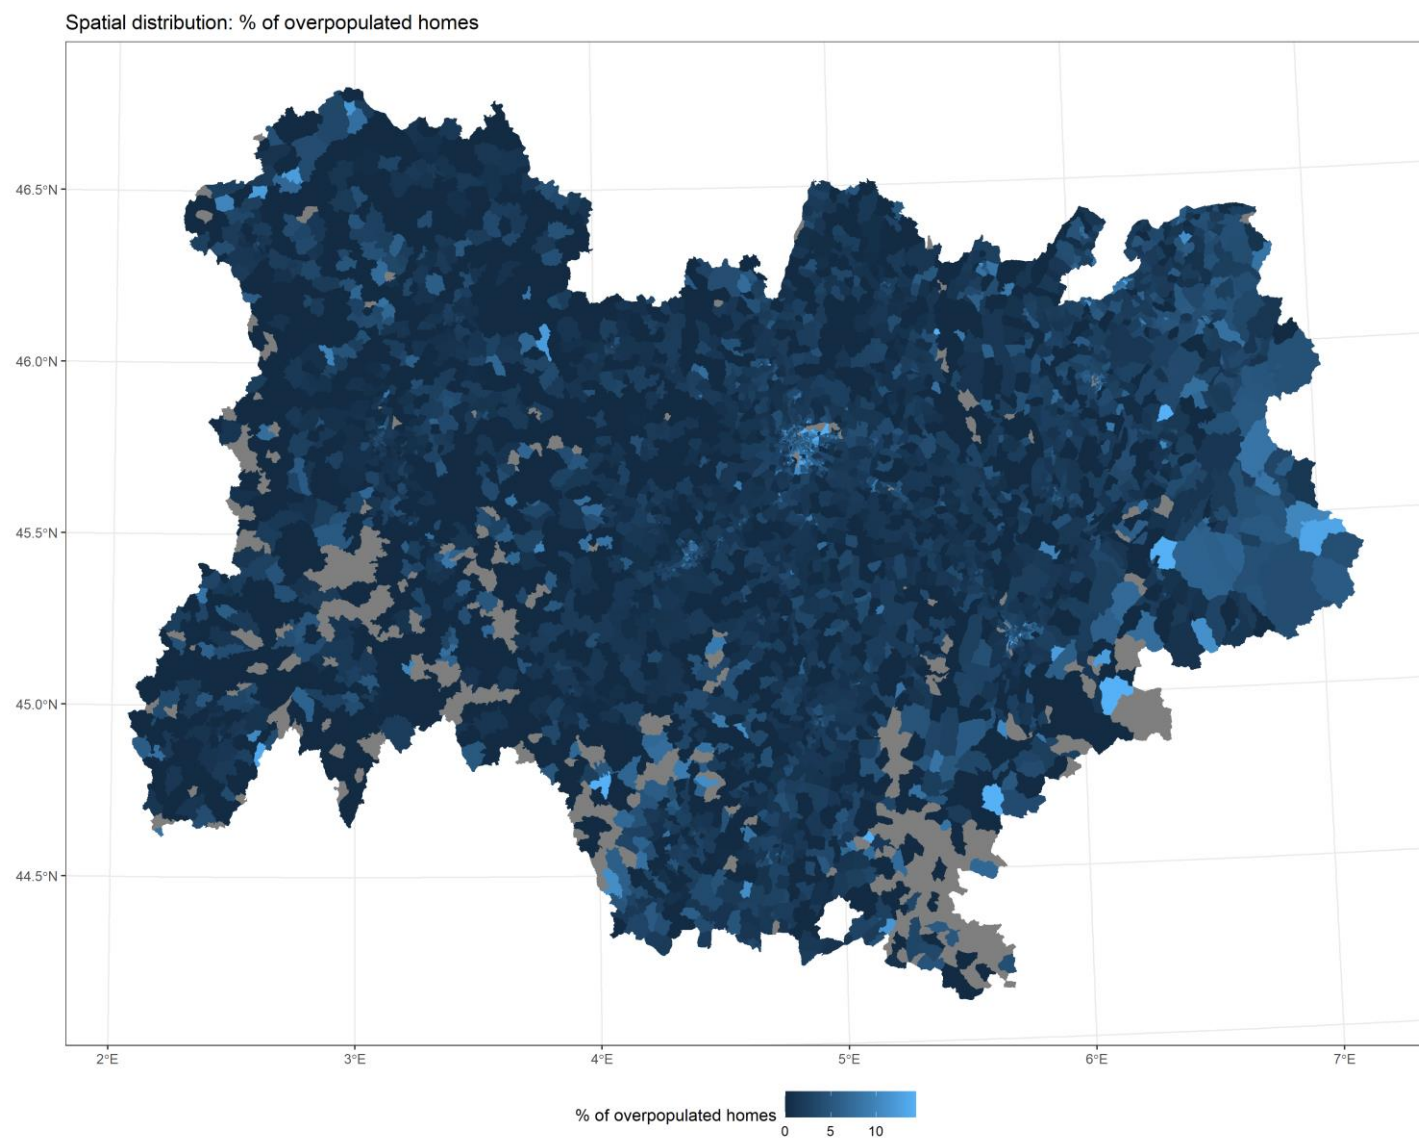

Figure 11
