# Supplementary material for: Usefulness of ecological mobility and socio-economic indicators in SARS-CoV-2 infection modelling: a French case study
Source: bioRxiv or medRxiv preprint supplement (doi:10.1101/2024.05.05.24306895), 2024-05-06
Supplement: Supplementary file [file media-1.zip]

## Models diagnostics

Residuals: Pearson's residuals for each spatial unit, model (null model M1, covariates only M2, spatial effects only M3, full model M4) and period (low incidence, growth, peak and decrease, stabilization).

Predictive check: position of the observed incidence for a given spatial unit compared to the predicted values (computed from each chain iteration), for each spatial unit, model, and period. The observed value for the spatial units in red or blue are lower than the 5th percentile or greater than the 95th percentile of the predicted values, indicating an inadequate prediction.

|                                                         |    |
|---------------------------------------------------------|----|
| Figure 1 Residuals, M1, low incidence .....             | 3  |
| Figure 2 Residuals, M2, low incidence .....             | 4  |
| Figure 3 Residuals, M3, low incidence .....             | 5  |
| Figure 4 Residuals, M4, low incidence .....             | 6  |
| Figure 5 Predictive check, M1, low incidence .....      | 7  |
| Figure 6 Predictive check, M2, low incidence .....      | 8  |
| Figure 7 Predictive check, M3, low incidence .....      | 9  |
| Figure 8 Predictive check, M4, low incidence .....      | 10 |
| Figure 9 Residuals, M1, growth .....                    | 11 |
| Figure 10 Residuals, M2, growth .....                   | 12 |
| Figure 11 Residuals, M3, growth .....                   | 13 |
| Figure 12 Residuals, M4, growth .....                   | 14 |
| Figure 13 Predictive check, M1, growth .....            | 15 |
| Figure 14 Predictive check, M2, growth .....            | 16 |
| Figure 15 Predictive check, M3, growth .....            | 17 |
| Figure 16 Predictive check, M4, growth .....            | 18 |
| Figure 17 Residuals, M1, peak and decrease .....        | 19 |
| Figure 18 Residuals, M2, peak and decrease .....        | 20 |
| Figure 19 Residuals, M3, peak and decrease .....        | 21 |
| Figure 20 Residuals, M4, peak and decrease .....        | 22 |
| Figure 21 Predictive check, M1, peak and decrease ..... | 23 |
| Figure 22 Predictive check, M2, peak and decrease ..... | 24 |
| Figure 23 Predictive check, M3, peak and decrease ..... | 25 |
| Figure 24 Predictive check, M4, peak and decrease ..... | 26 |
| Figure 25 Residuals, M1, stabilization .....            | 27 |
| Figure 26 Residuals, M2, stabilization .....            | 28 |
| Figure 27 Residuals, M3, stabilization .....            | 29 |
| Figure 28 Residuals, M4, stabilization .....            | 30 |
| Figure 29 Predictive check, M1, stabilization .....     | 31 |
| Figure 30 Predictive check, M2, stabilization .....     | 32 |
| Figure 31 Predictive check, M3, stabilization .....     | 33 |
| Figure 32 Predictive check, M4, stabilization .....     | 34 |

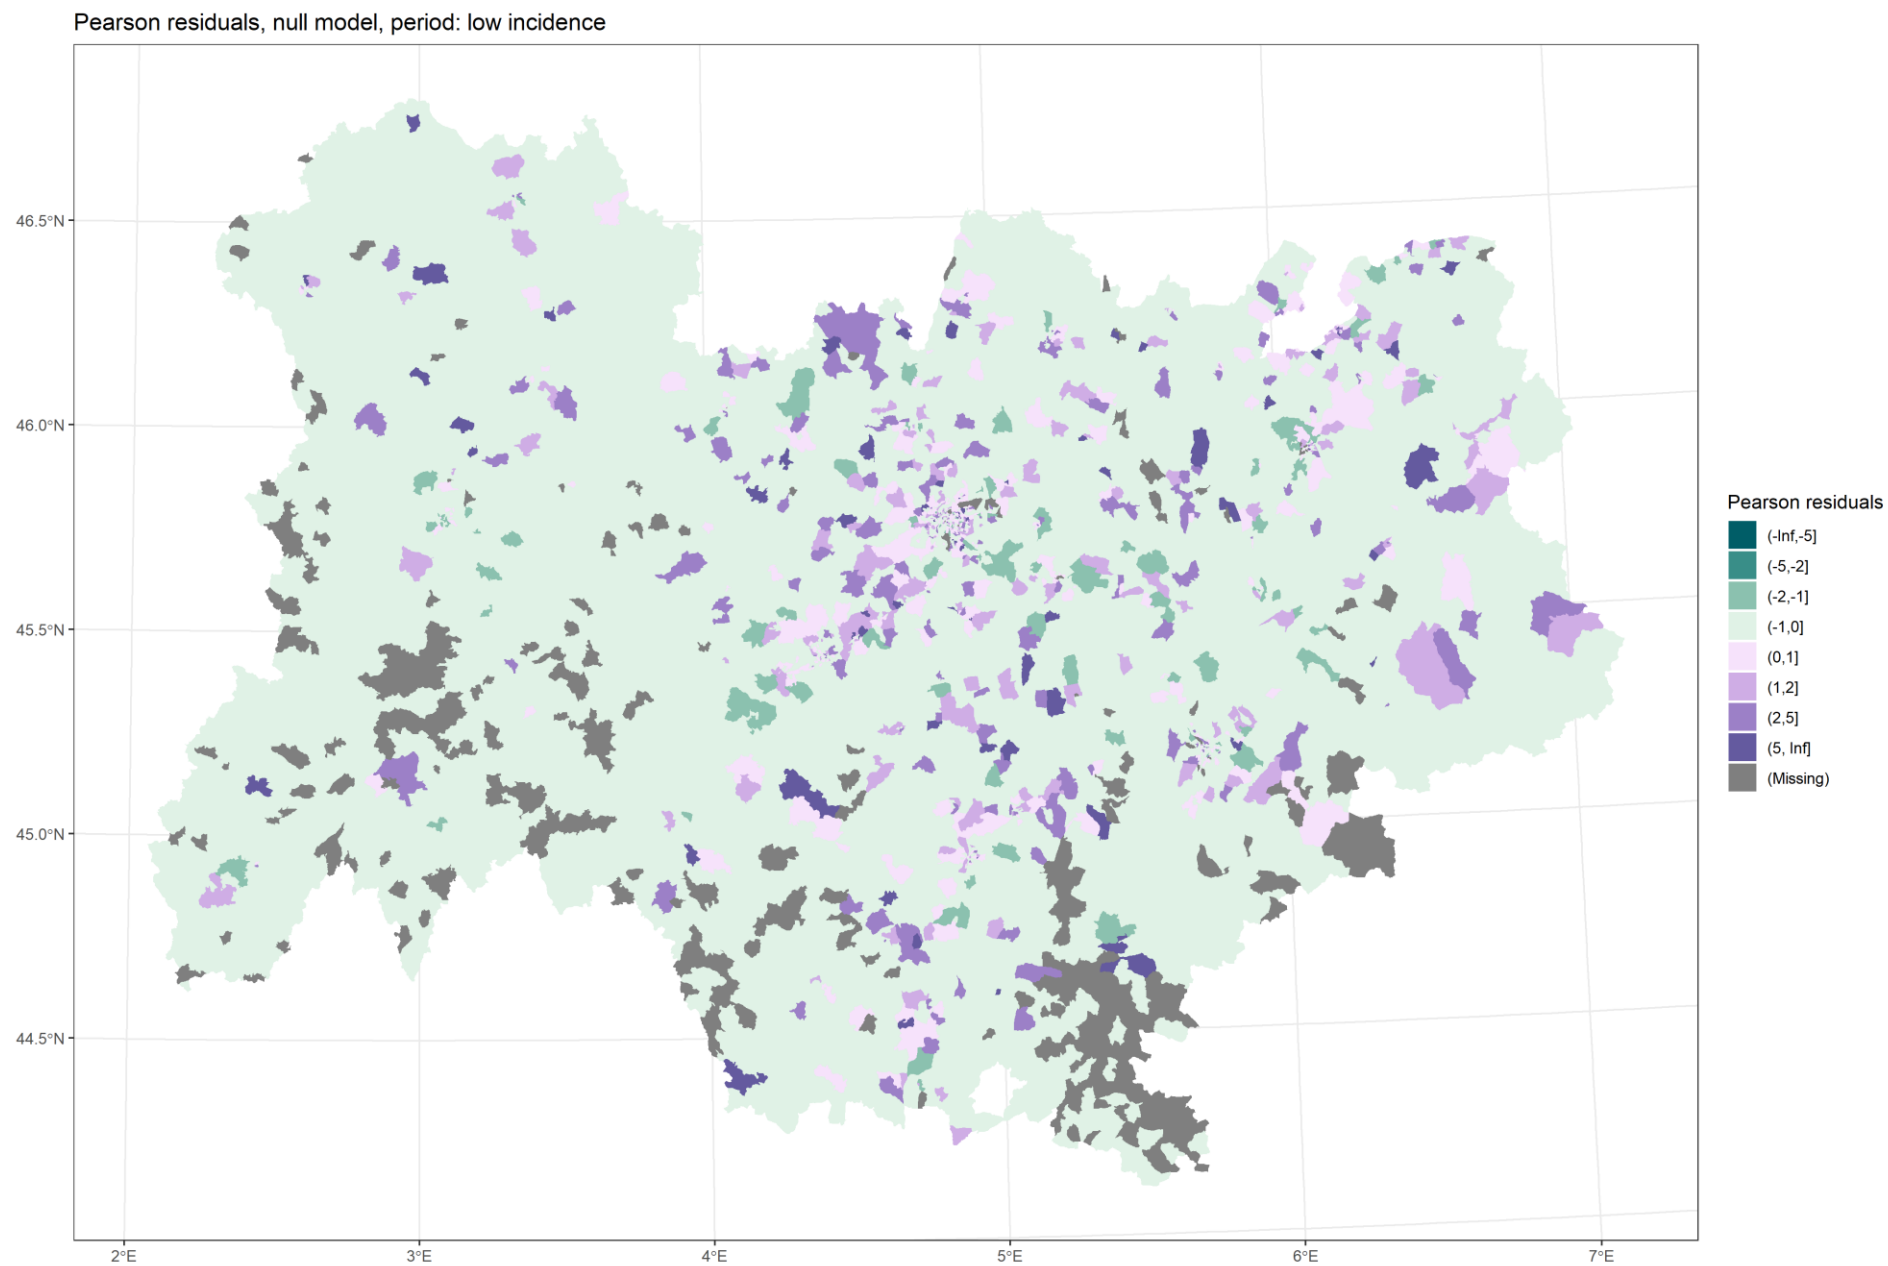

Figure 1 Residuals, M1, low incidence

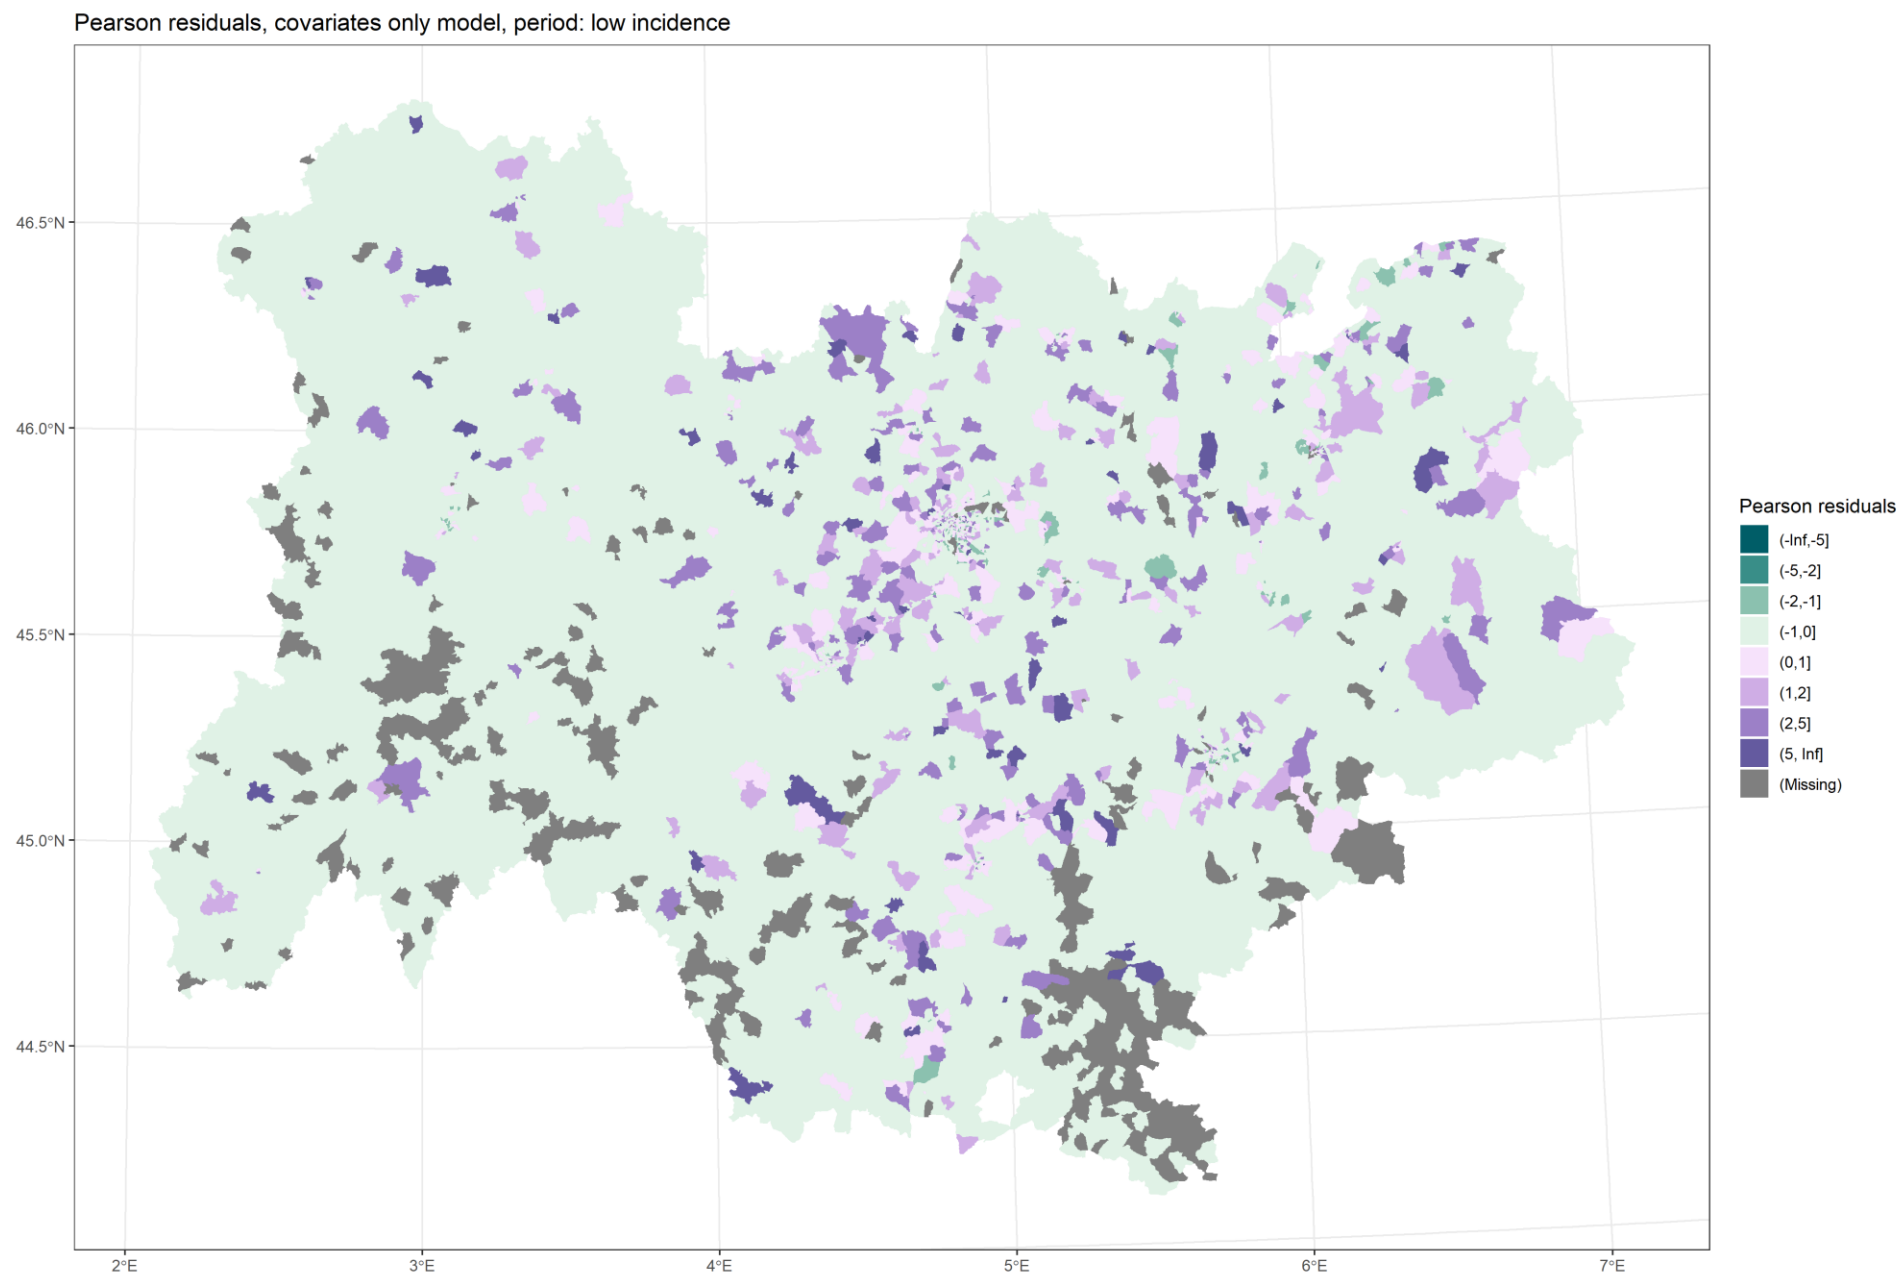

Figure 2 Residuals, M2, low incidence



Pearson residuals, spatial effects only model, period: low incidence

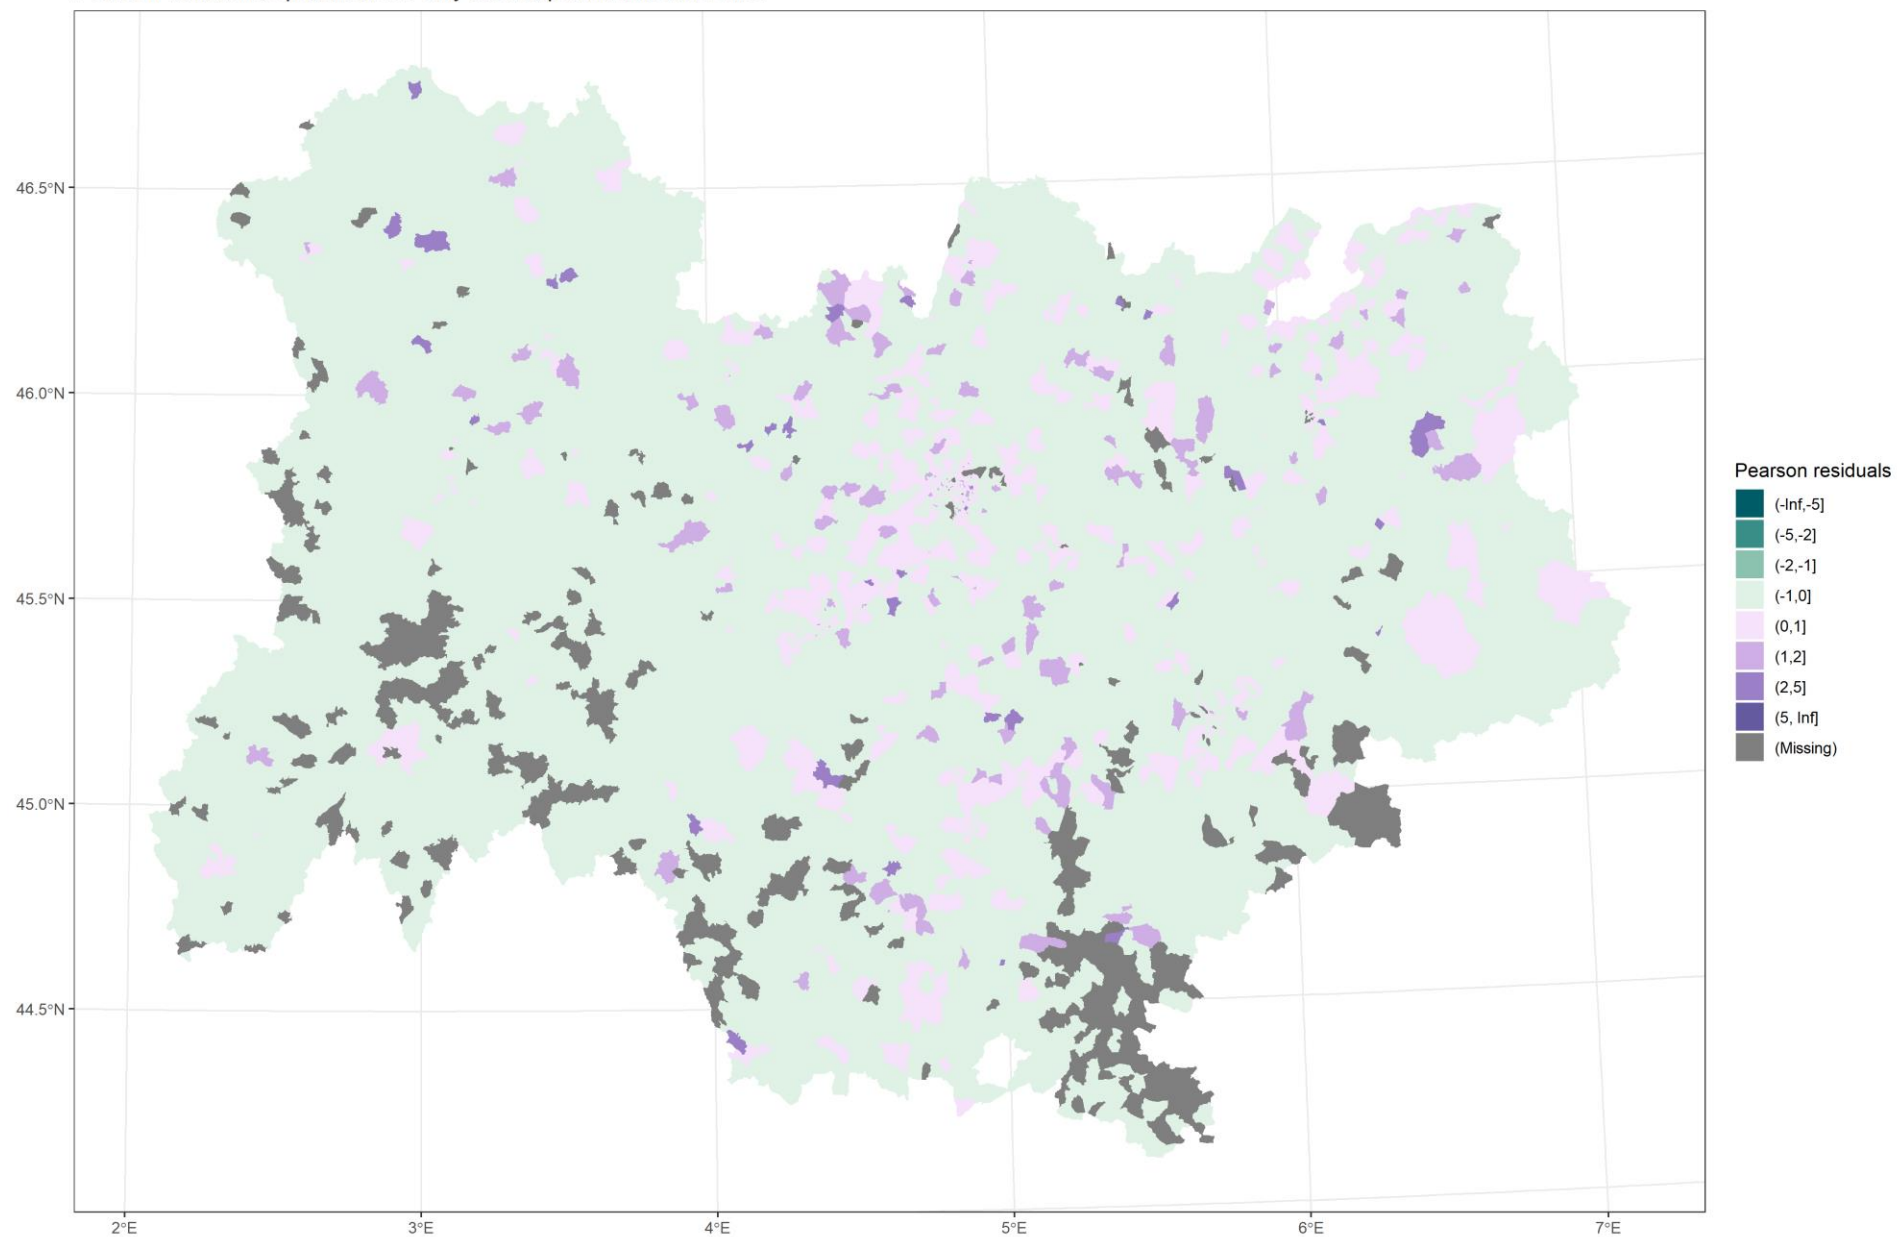

Figure 3 Residuals, M3, low incidence

Pearson residuals, full model, period: low incidence

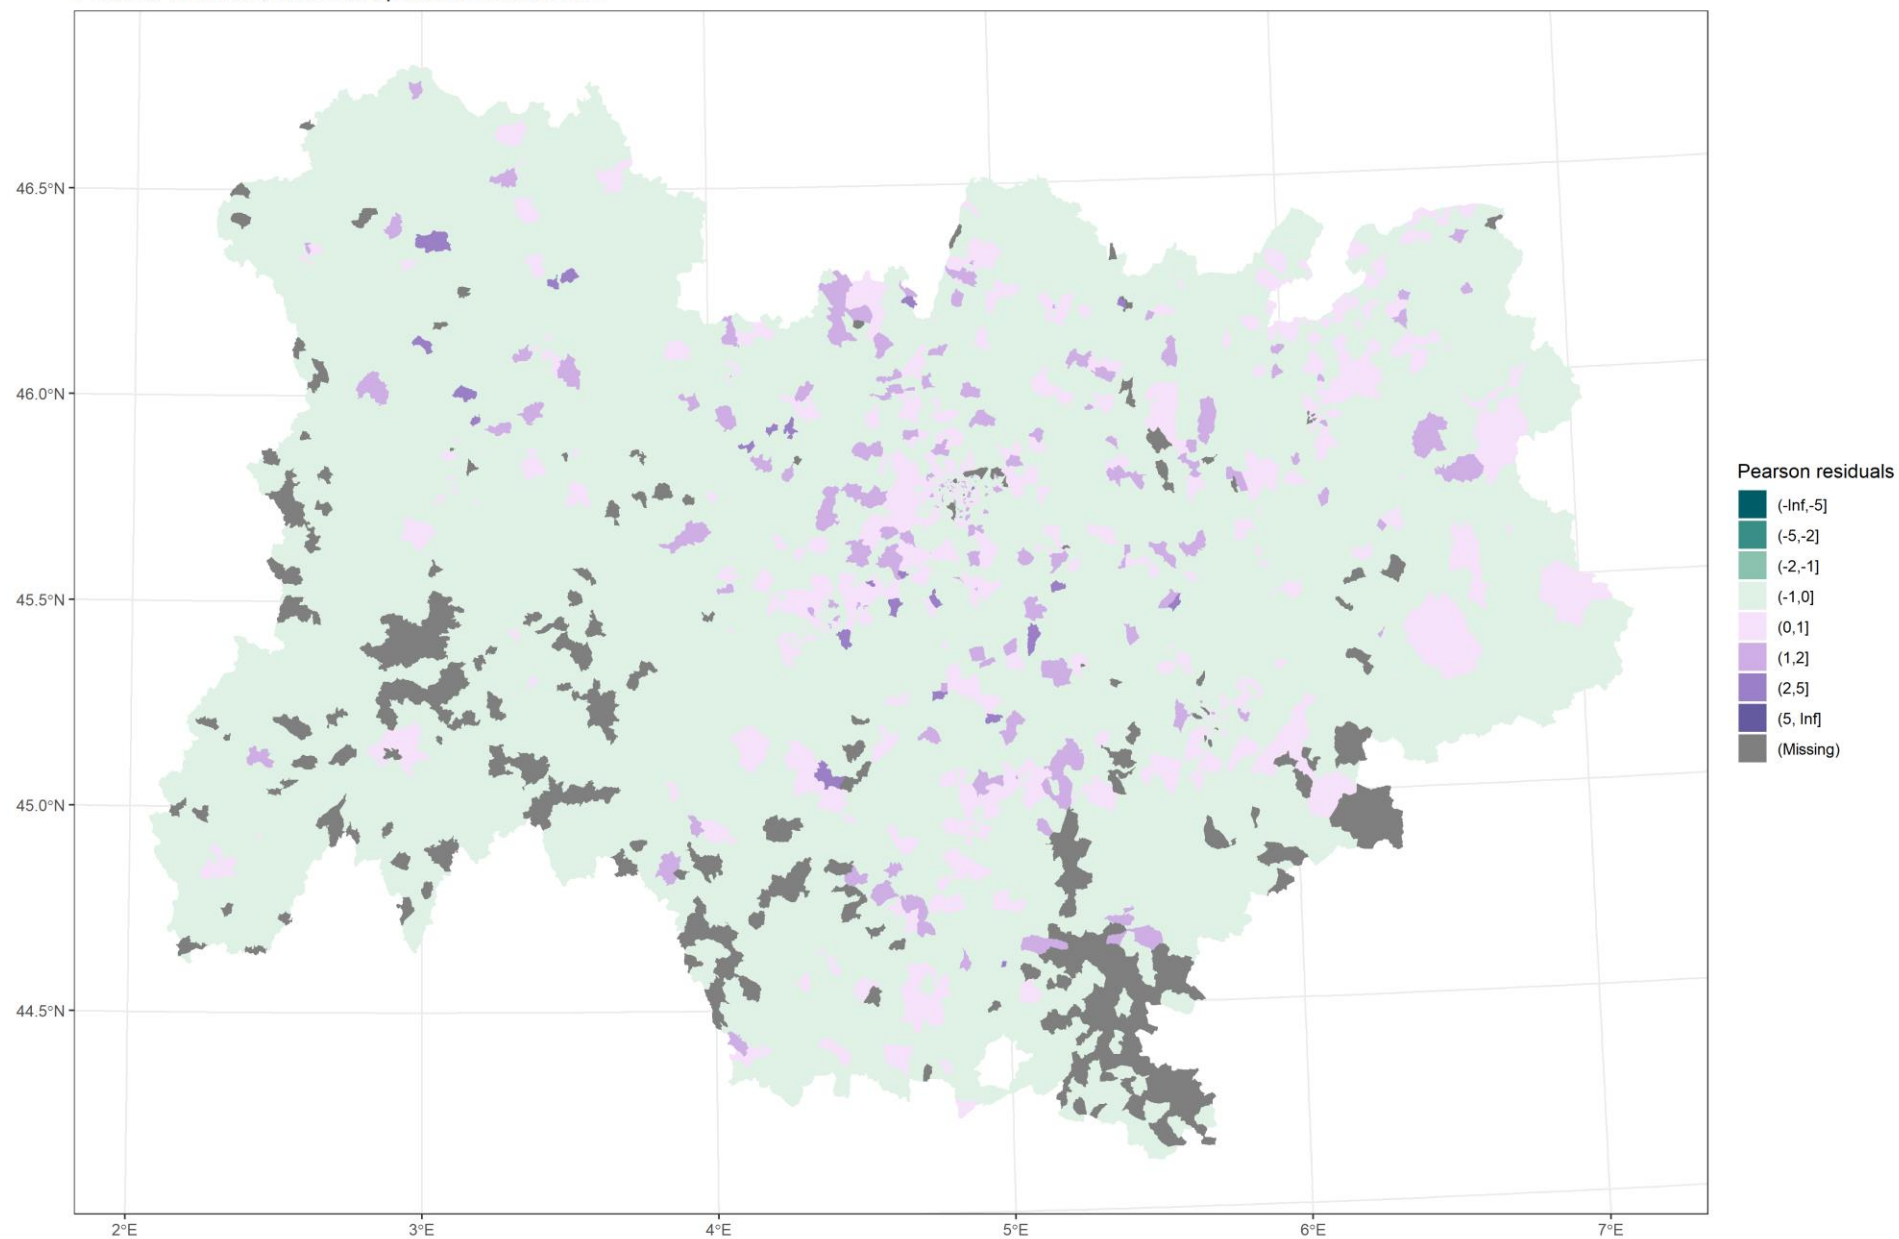

Figure 4 Residuals, M4, low incidence

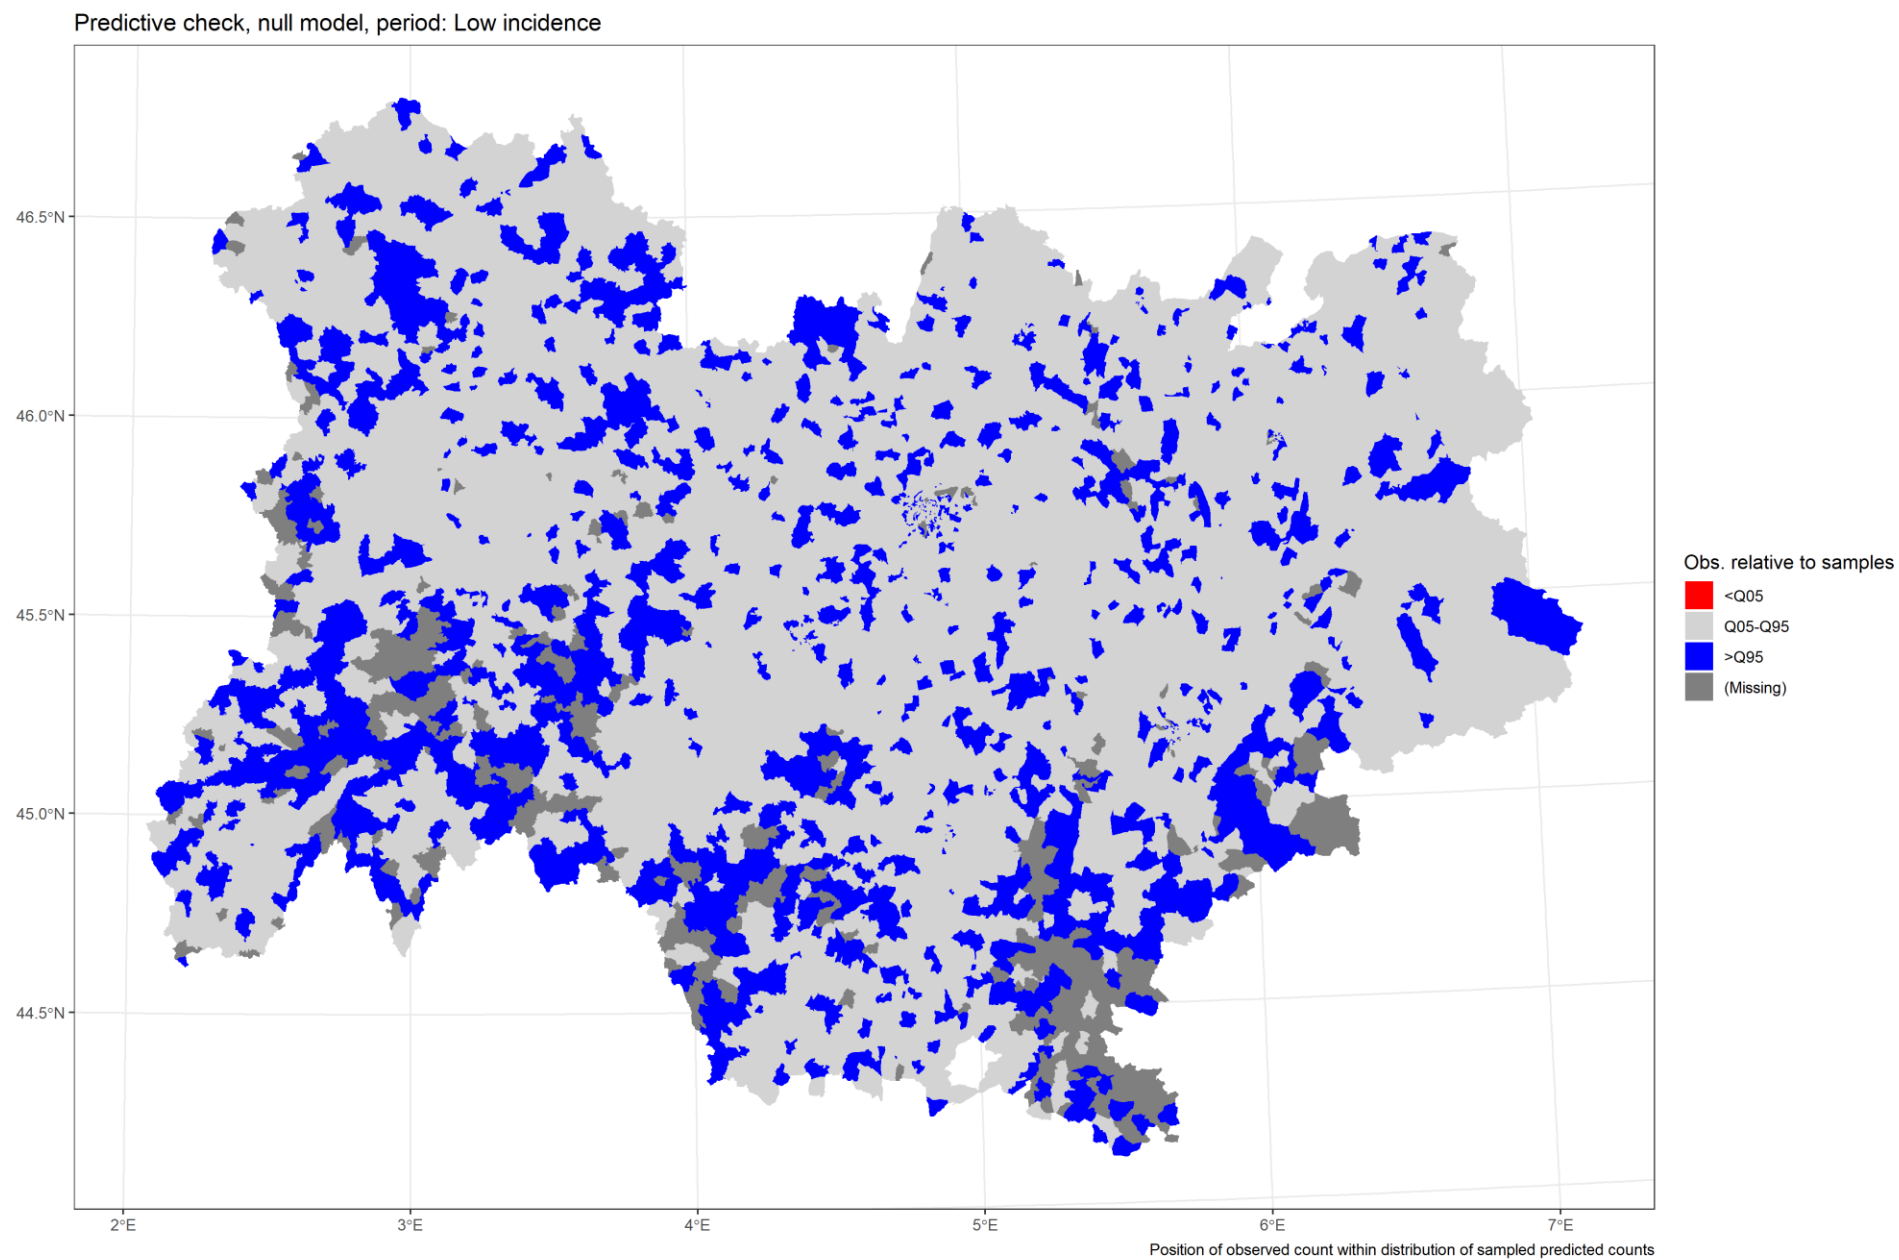

Figure 5 Predictive check, M1, low incidence

Predictive check, covariates only model, period: Low incidence

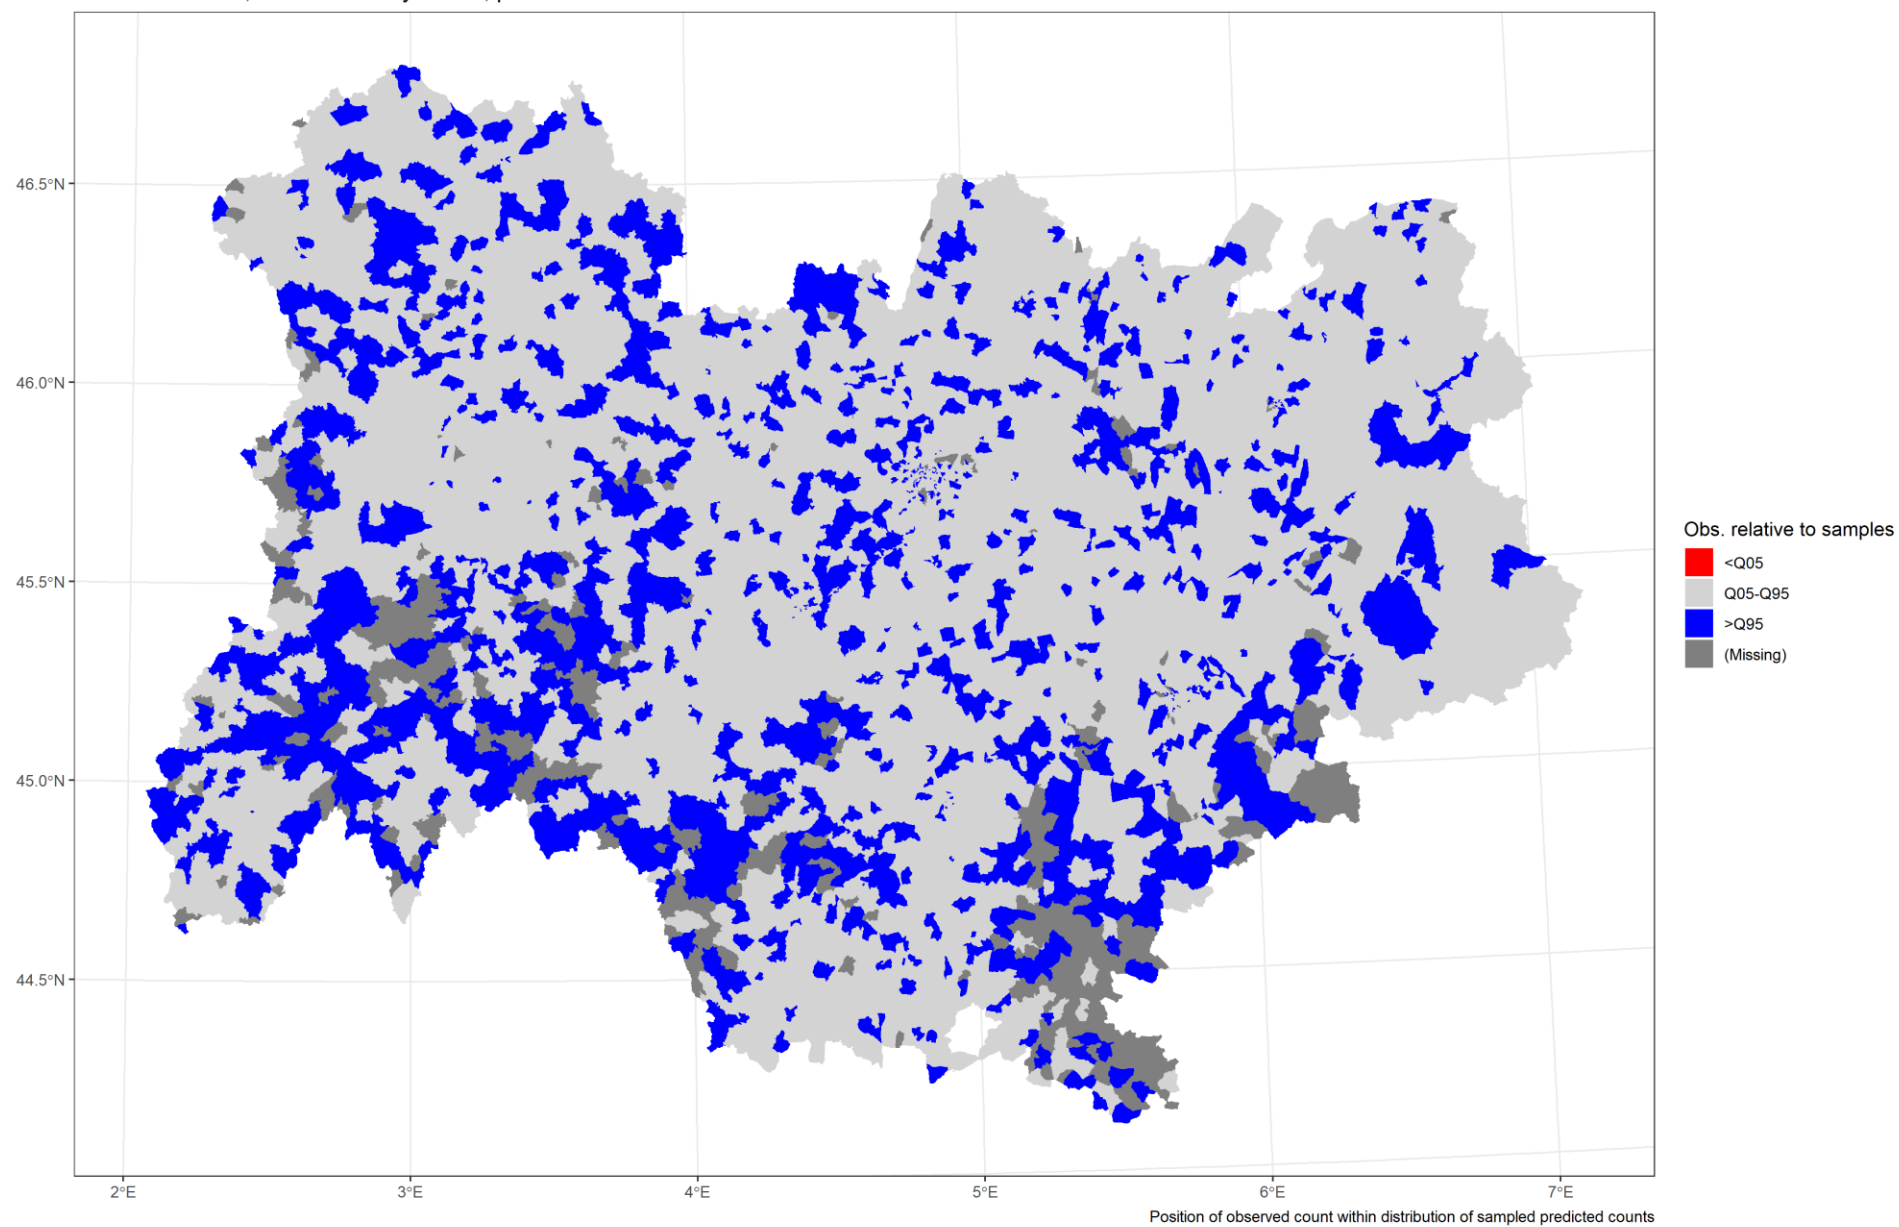

Figure 6 Predictive check, M2, low incidence

Predictive check, spatial effects only model, period: Low incidence

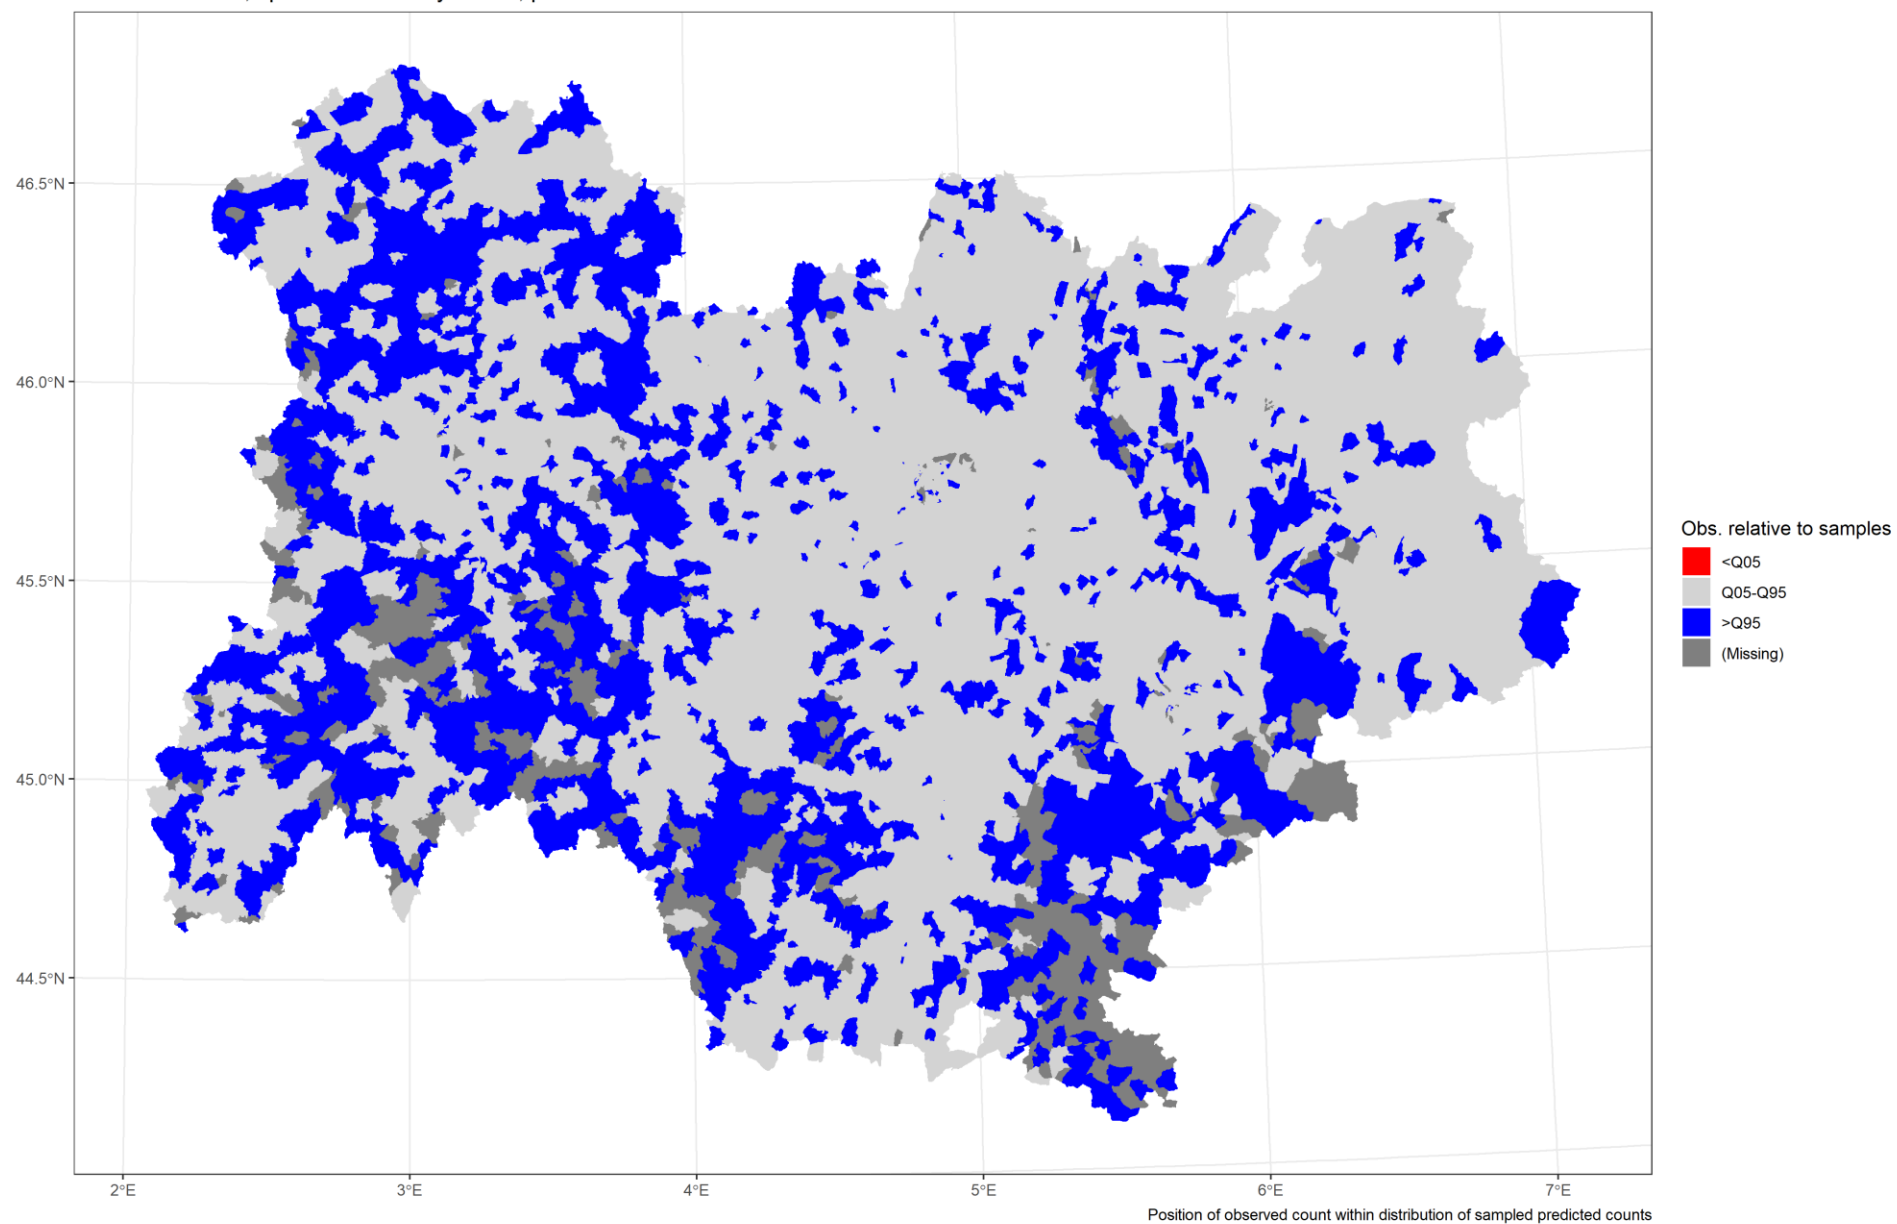

Figure 7 Predictive check, M3, low incidence



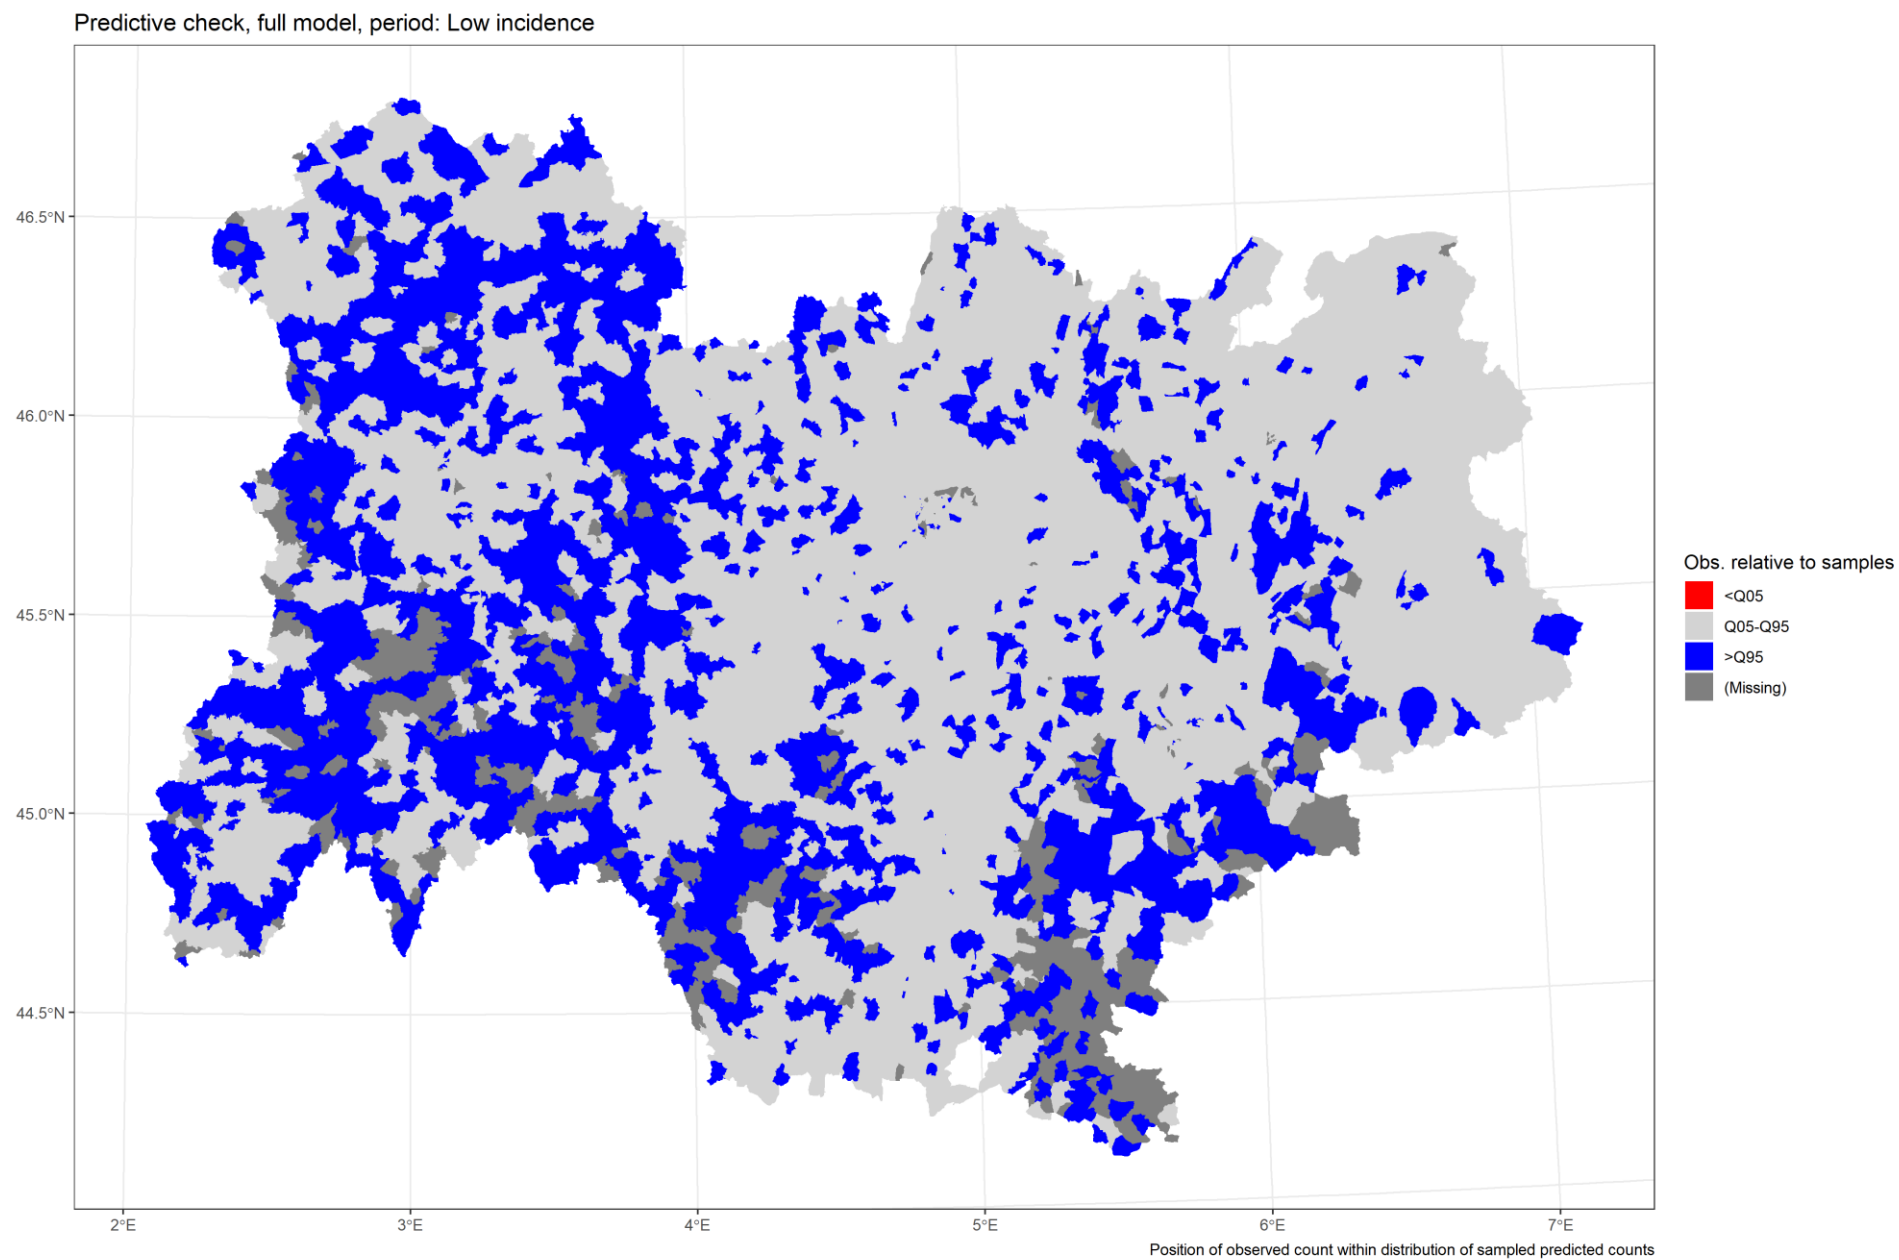

Figure 8 Predictive check, M4, low incidence

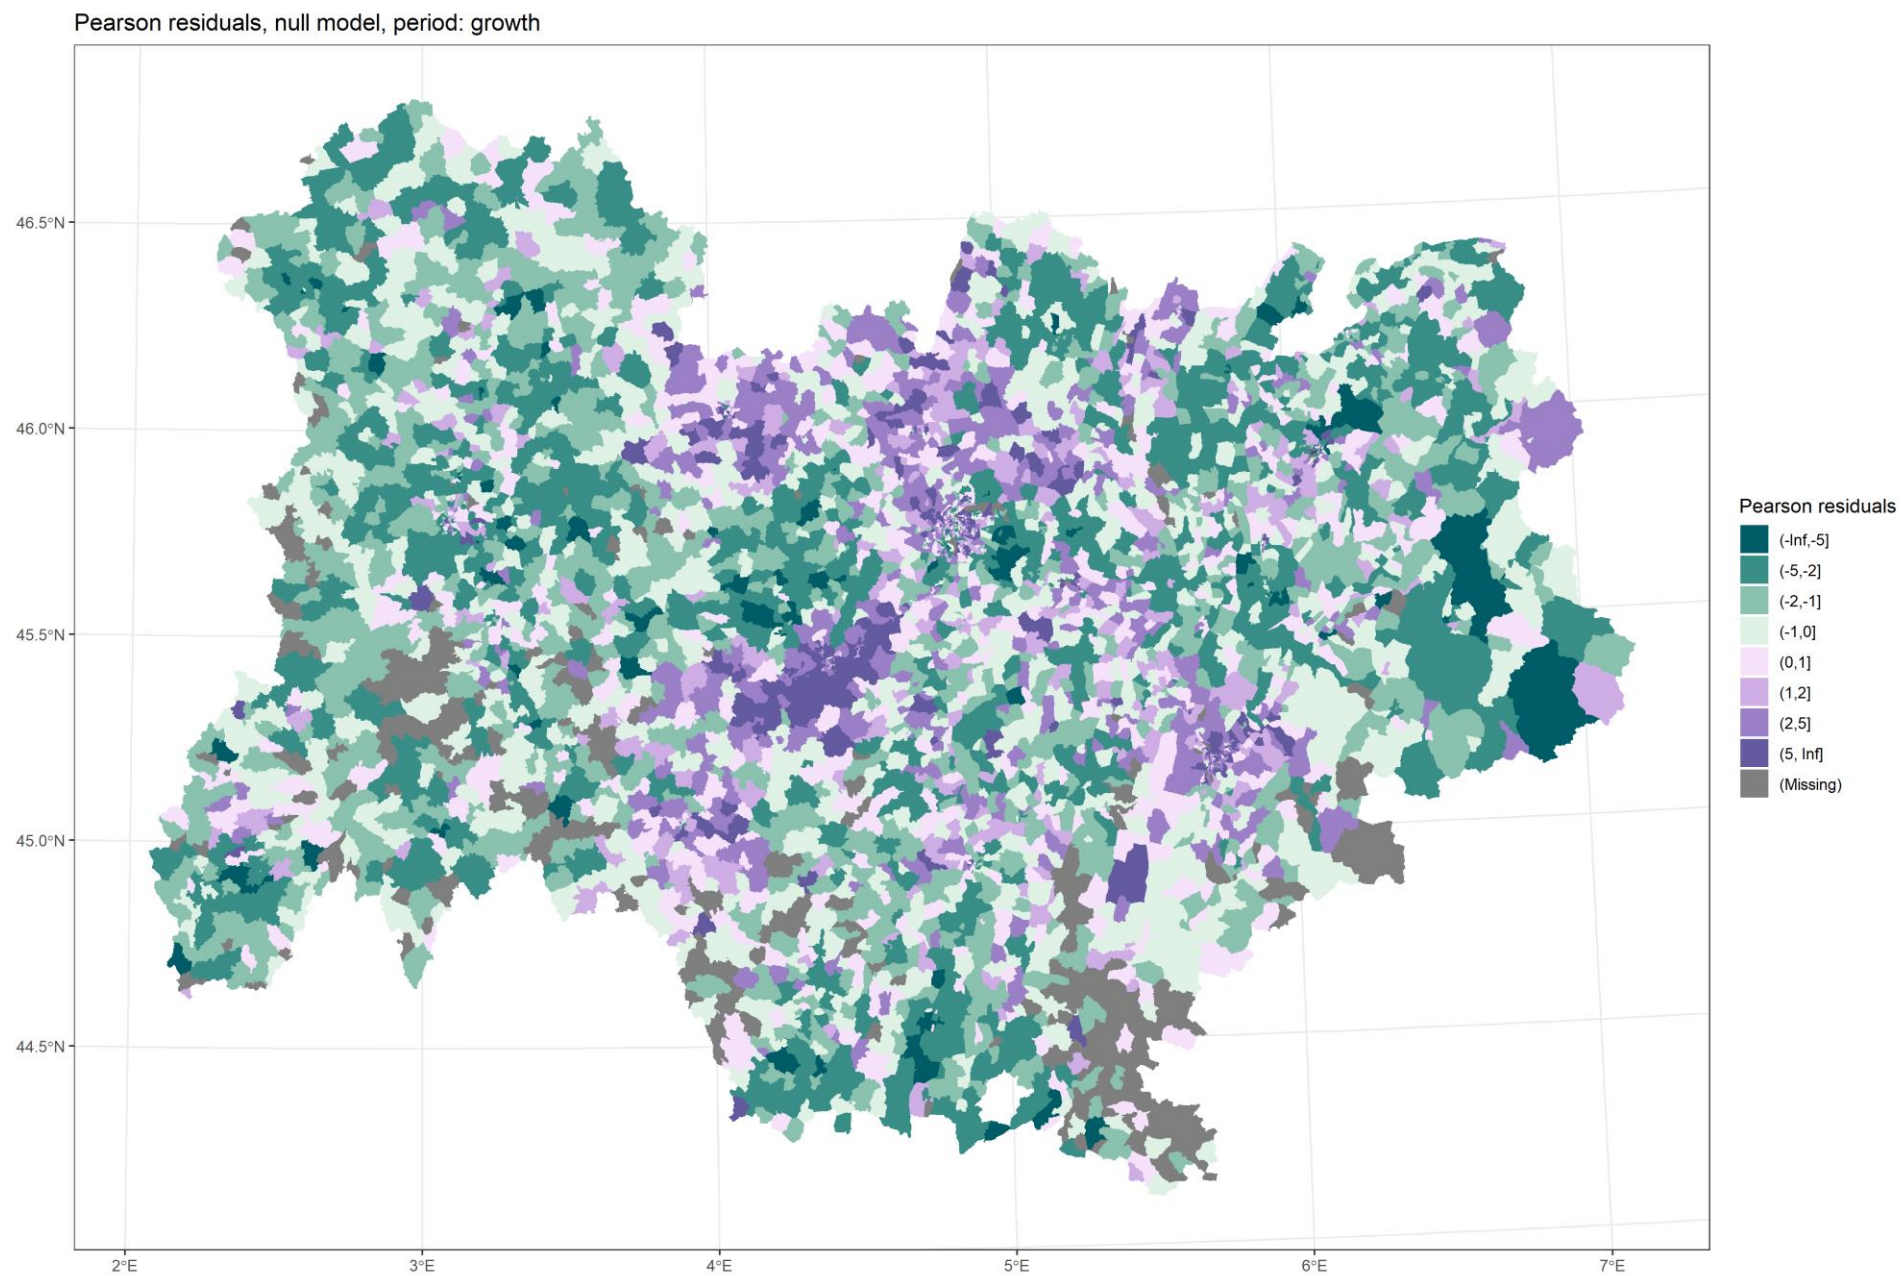

Figure 9 Residuals, M1, growth



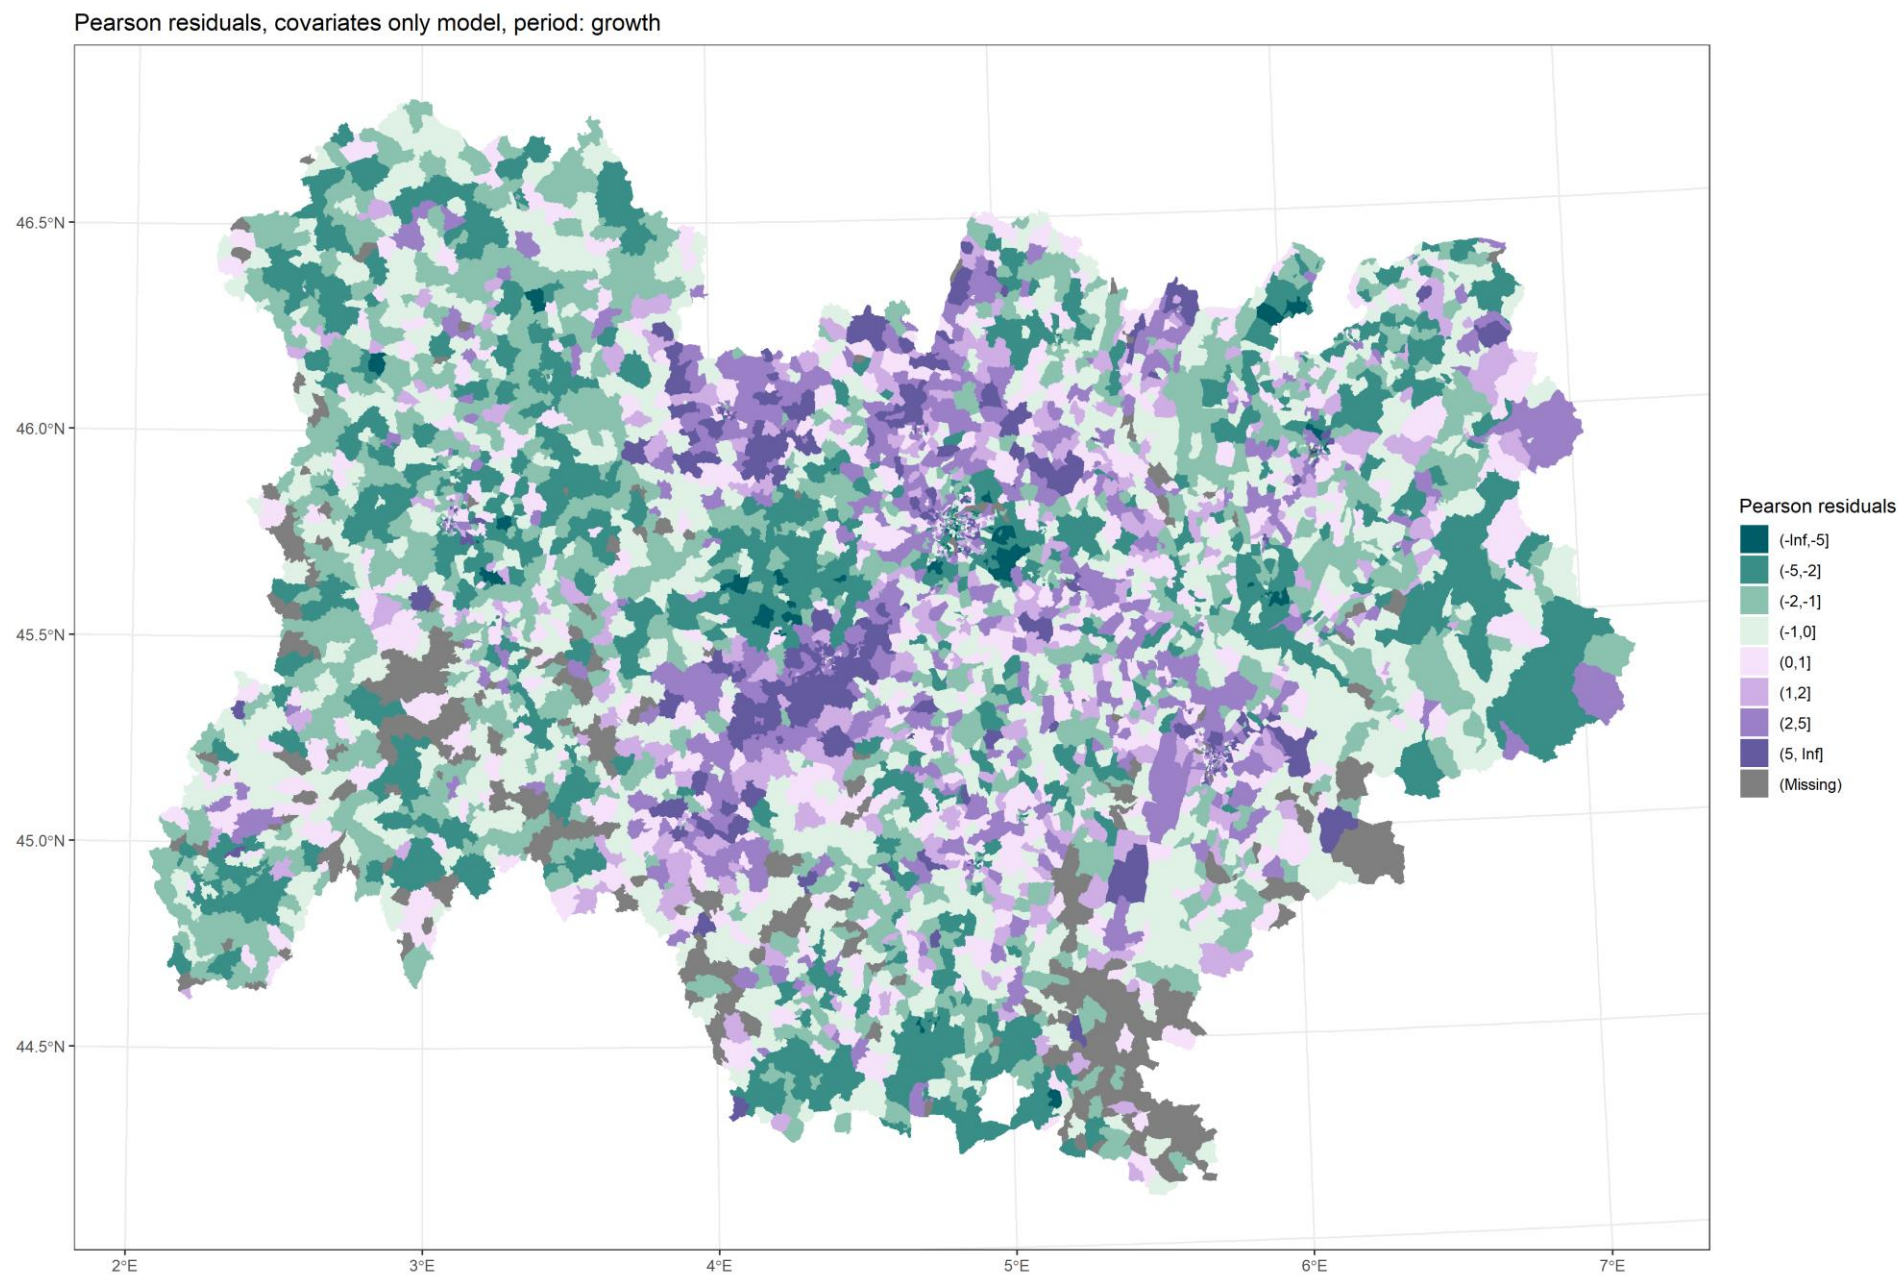

Figure 10 Residuals, M2, growth



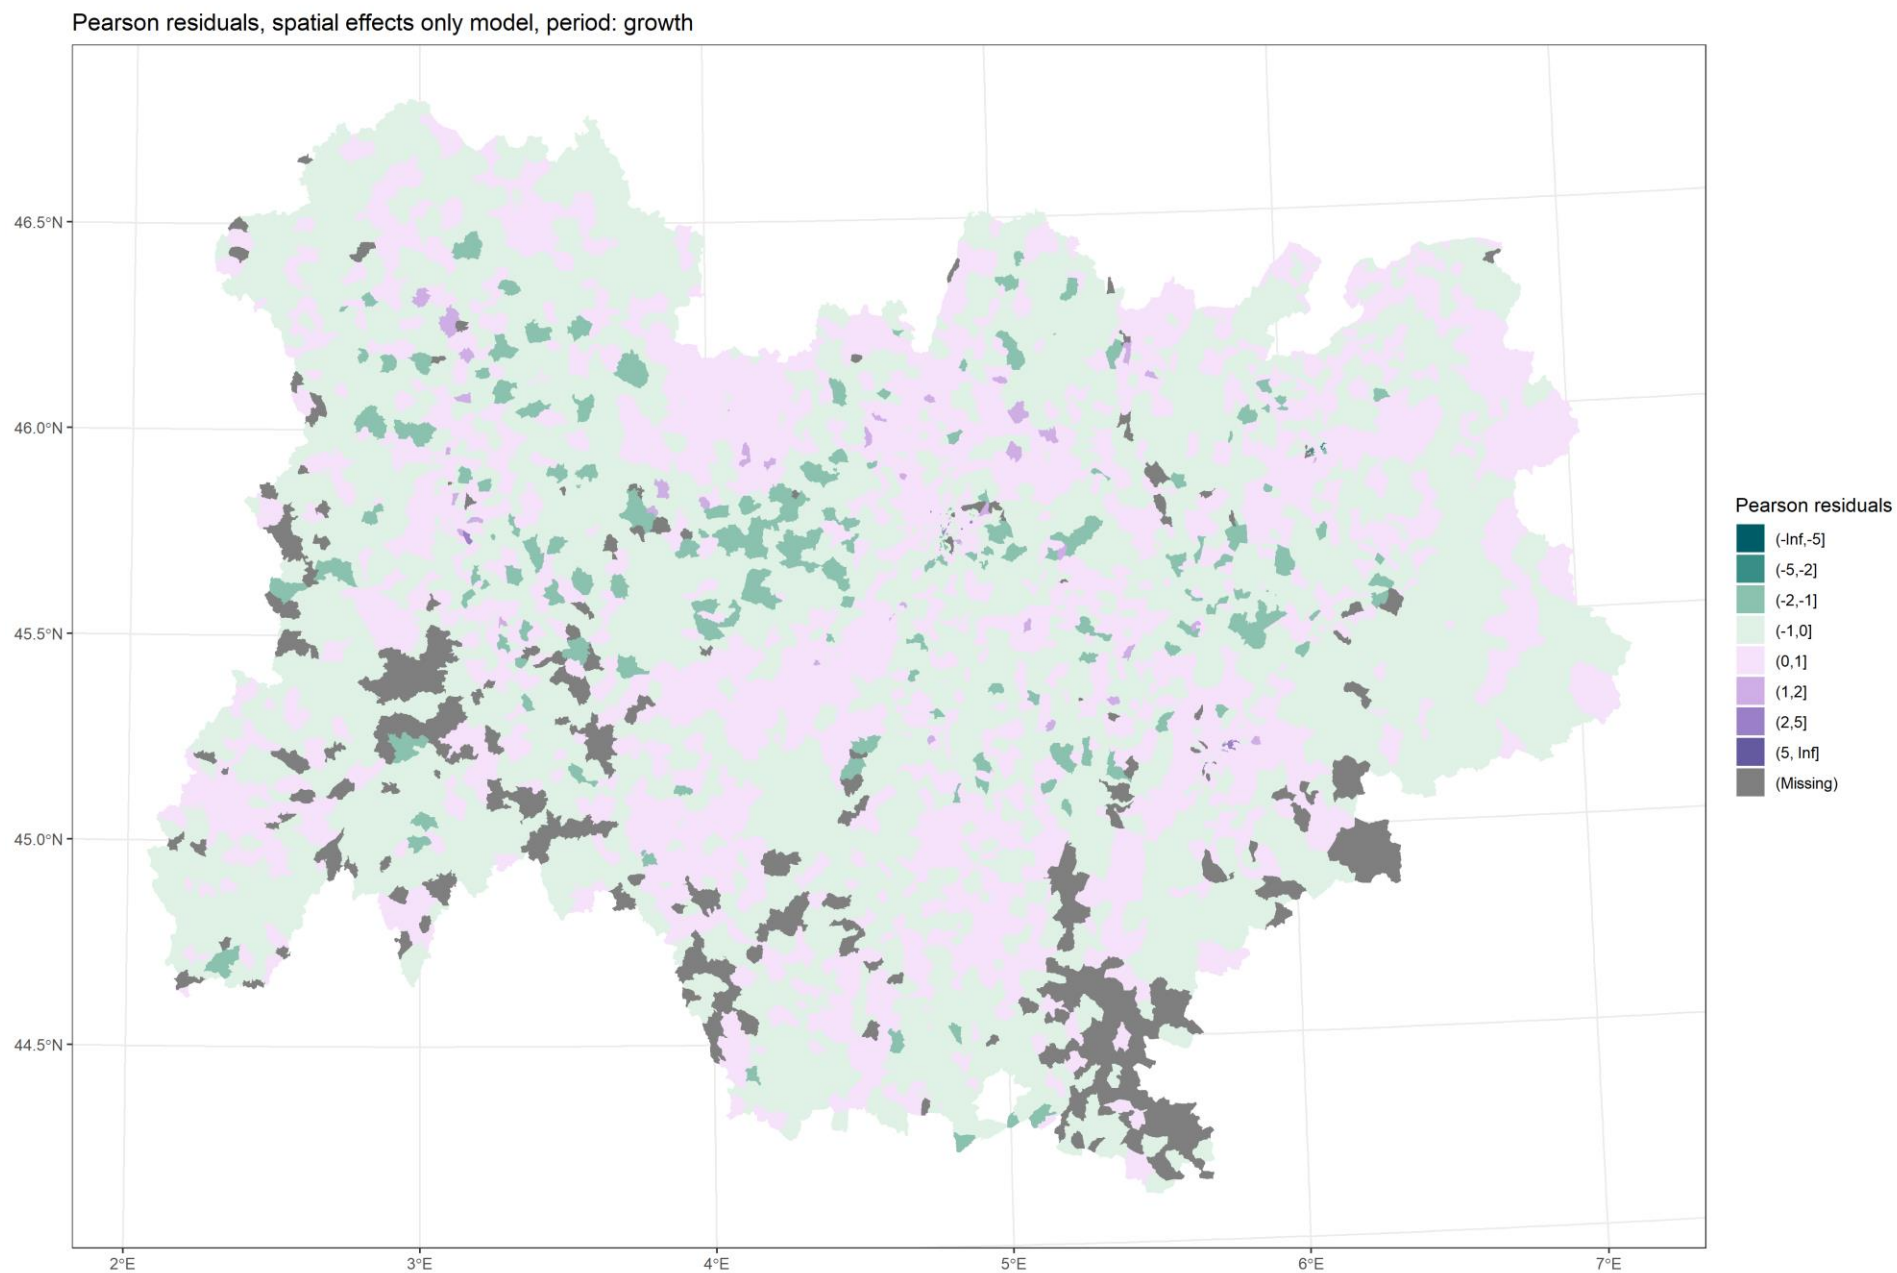

Figure 11 Residuals, M3, growth

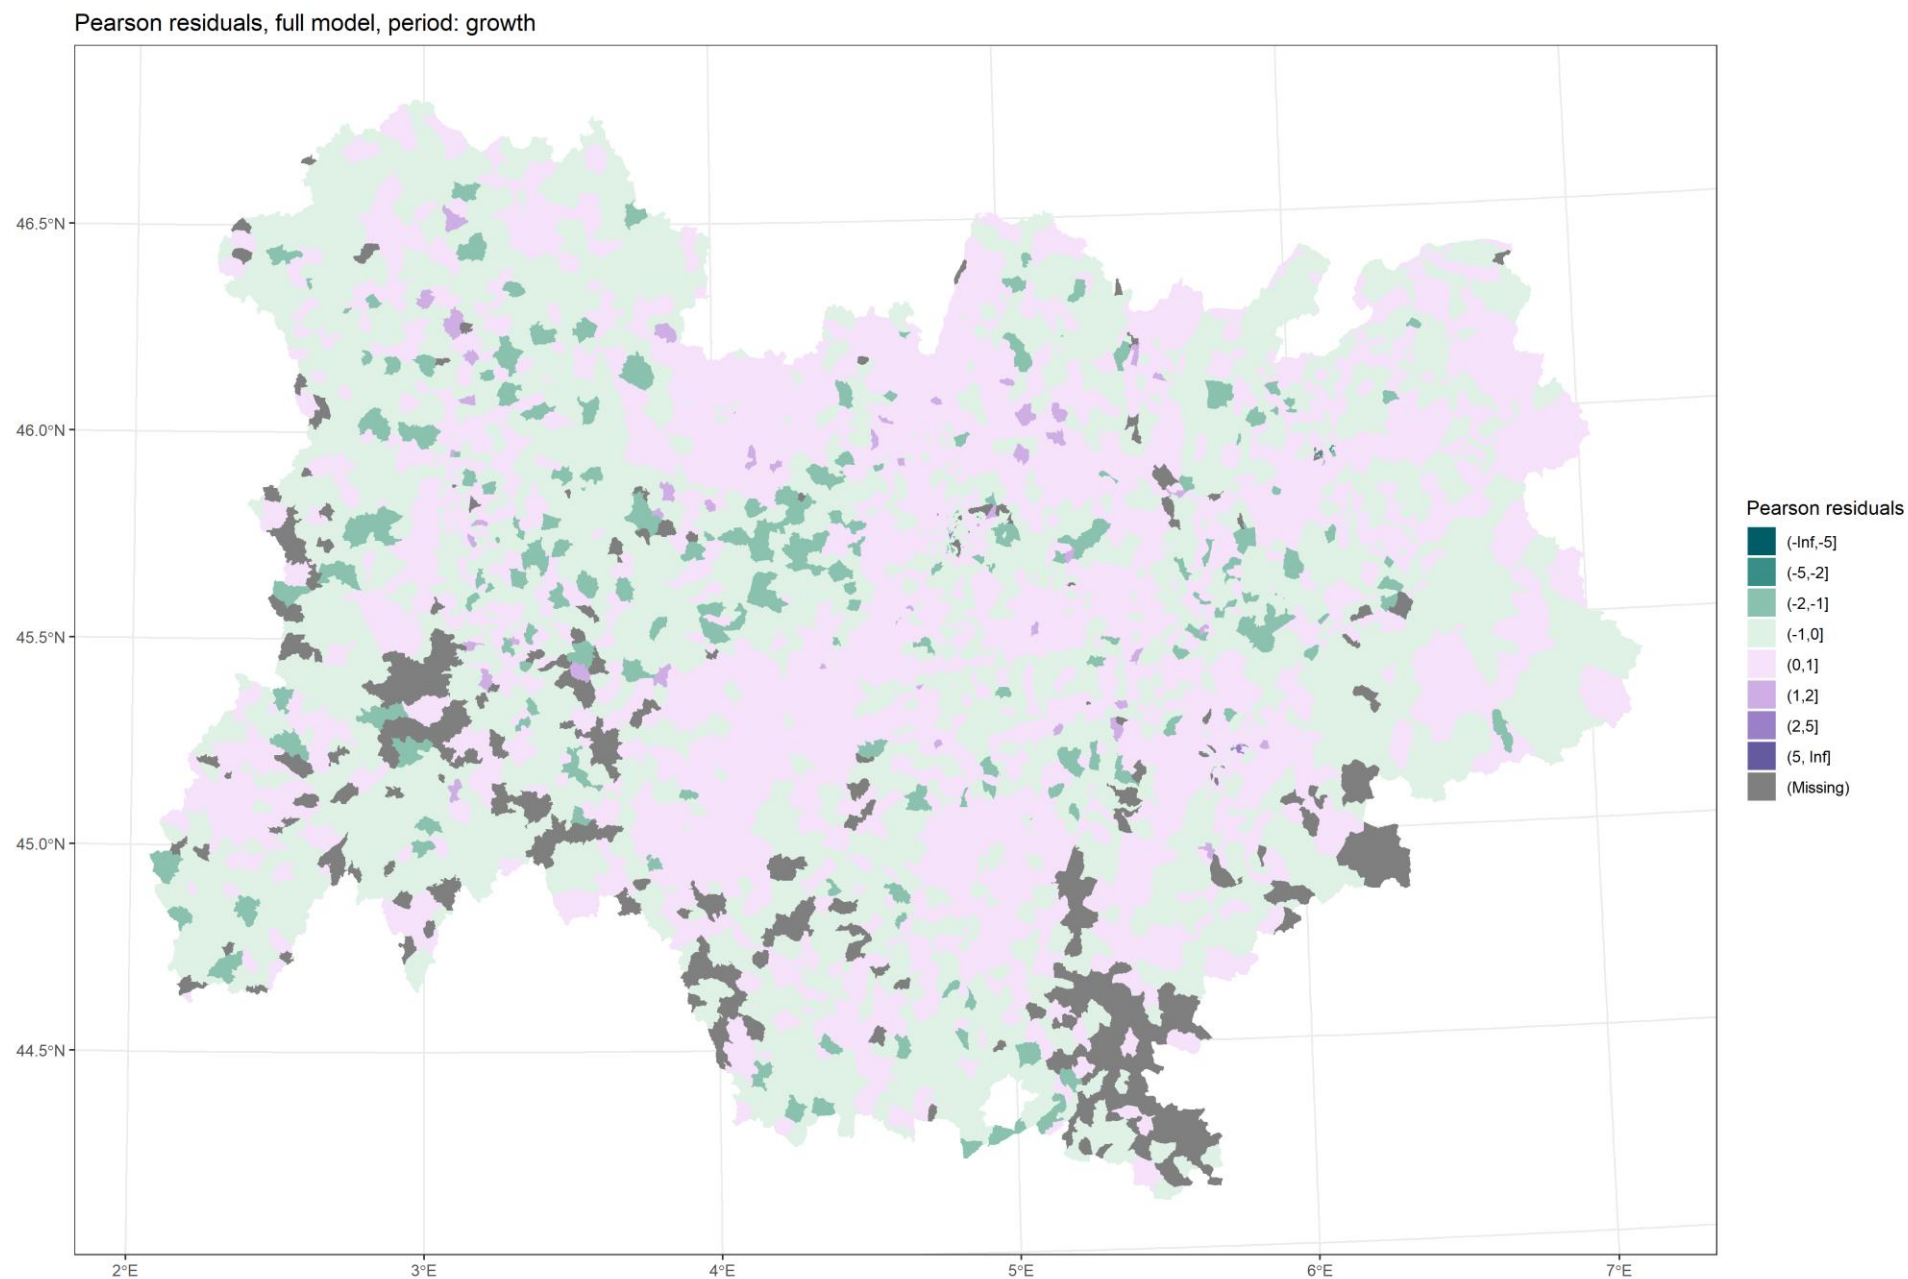

Figure 12 Residuals, M4, growth

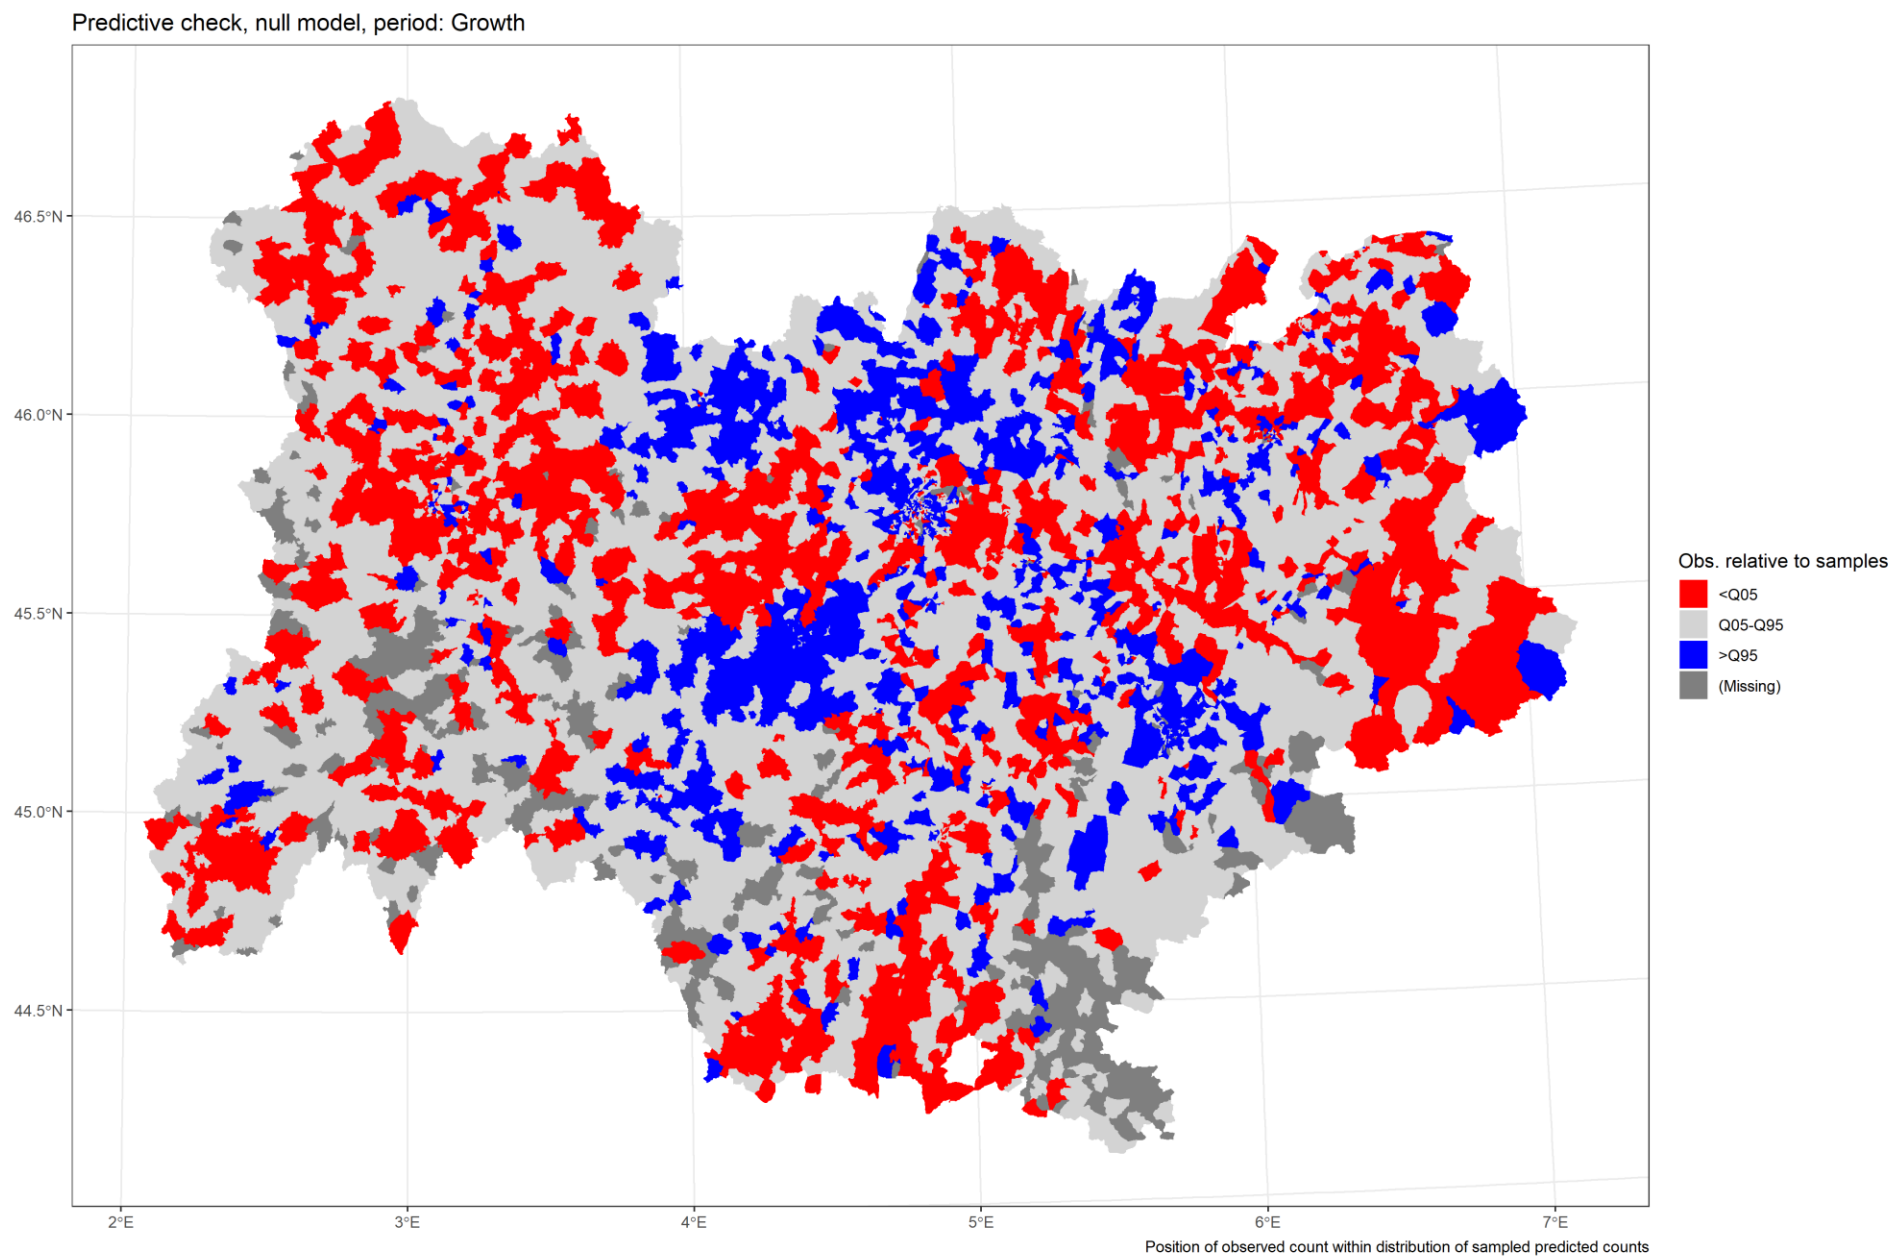

Figure 13 Predictive check, M1, growth

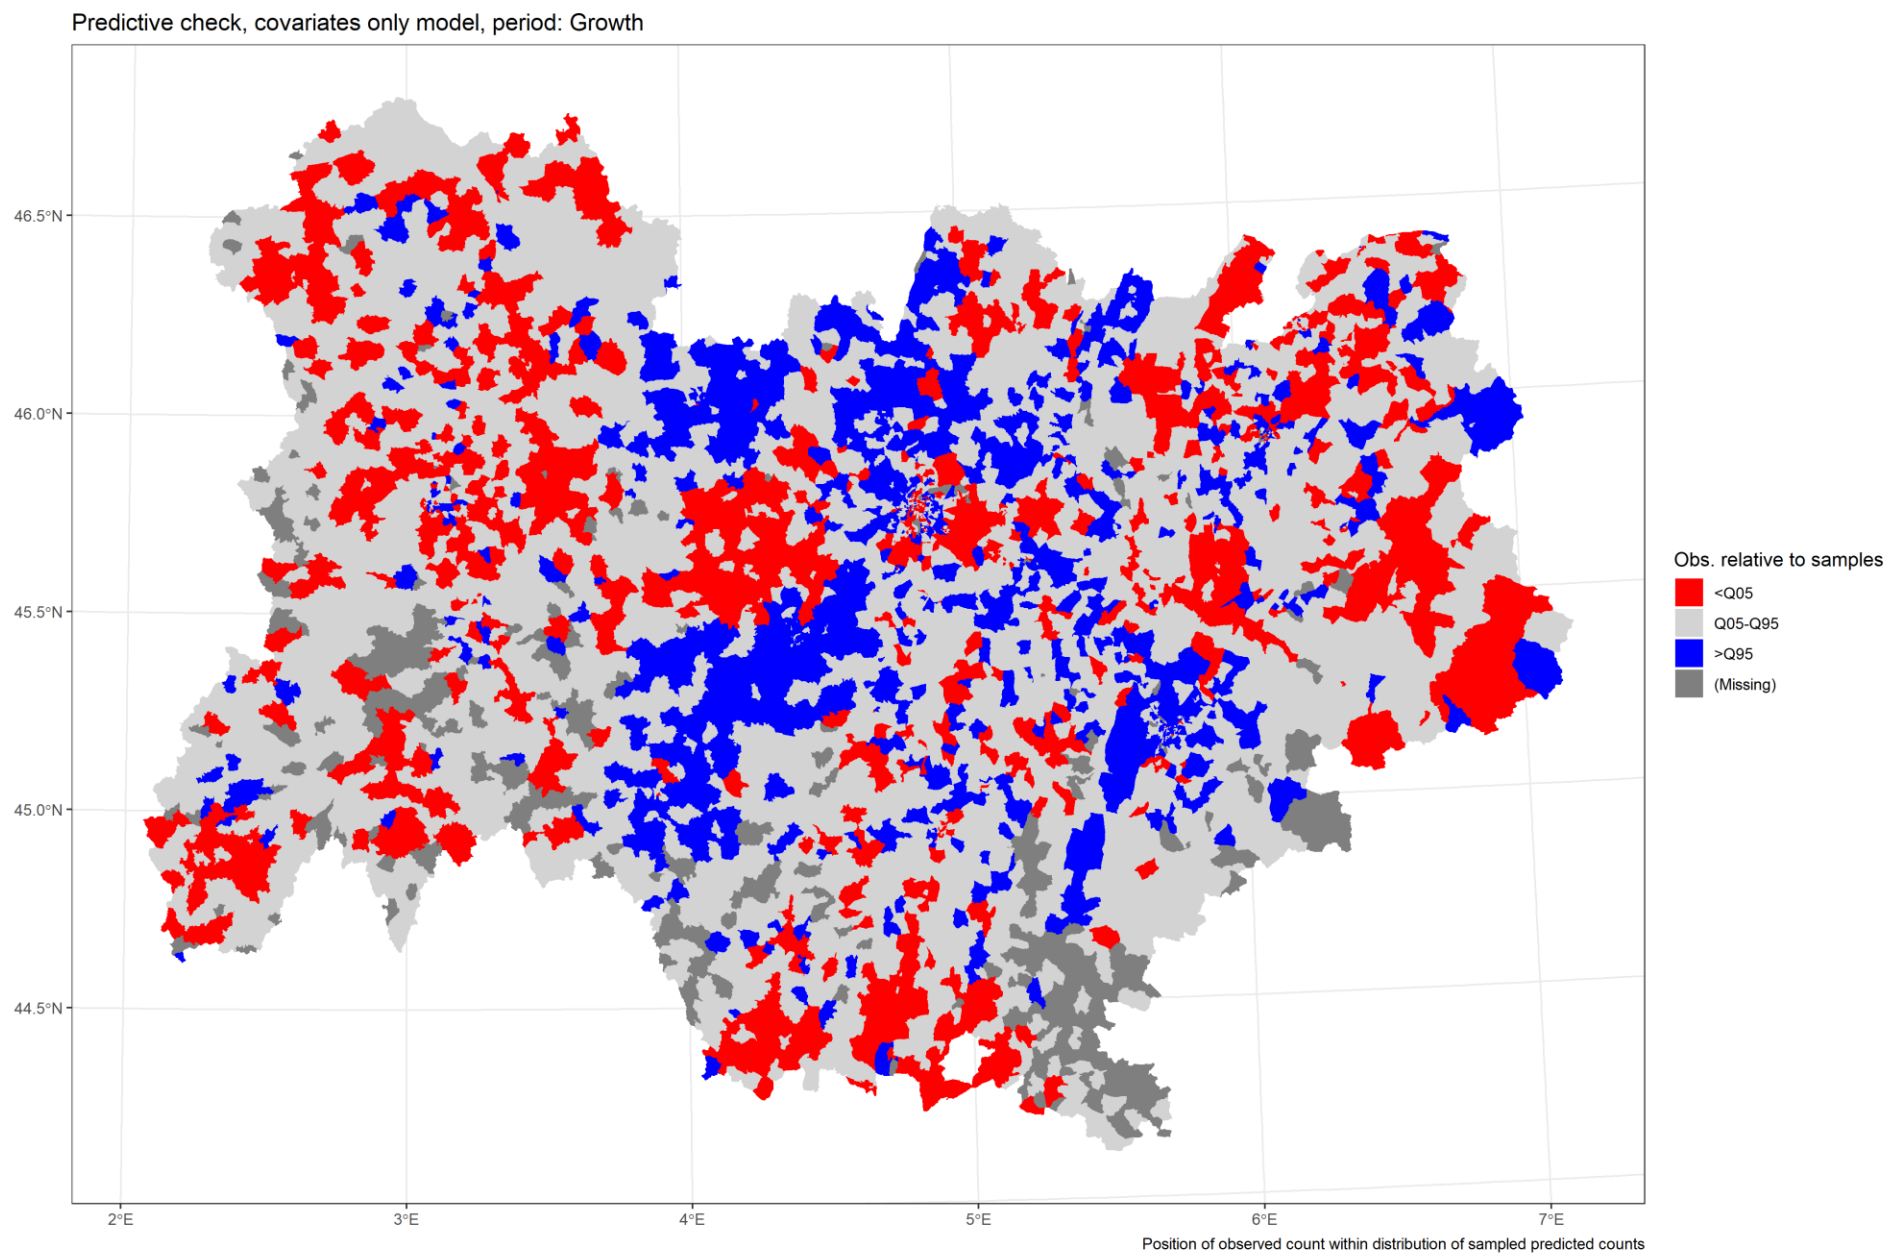

Figure 14 Predictive check, M2, growth

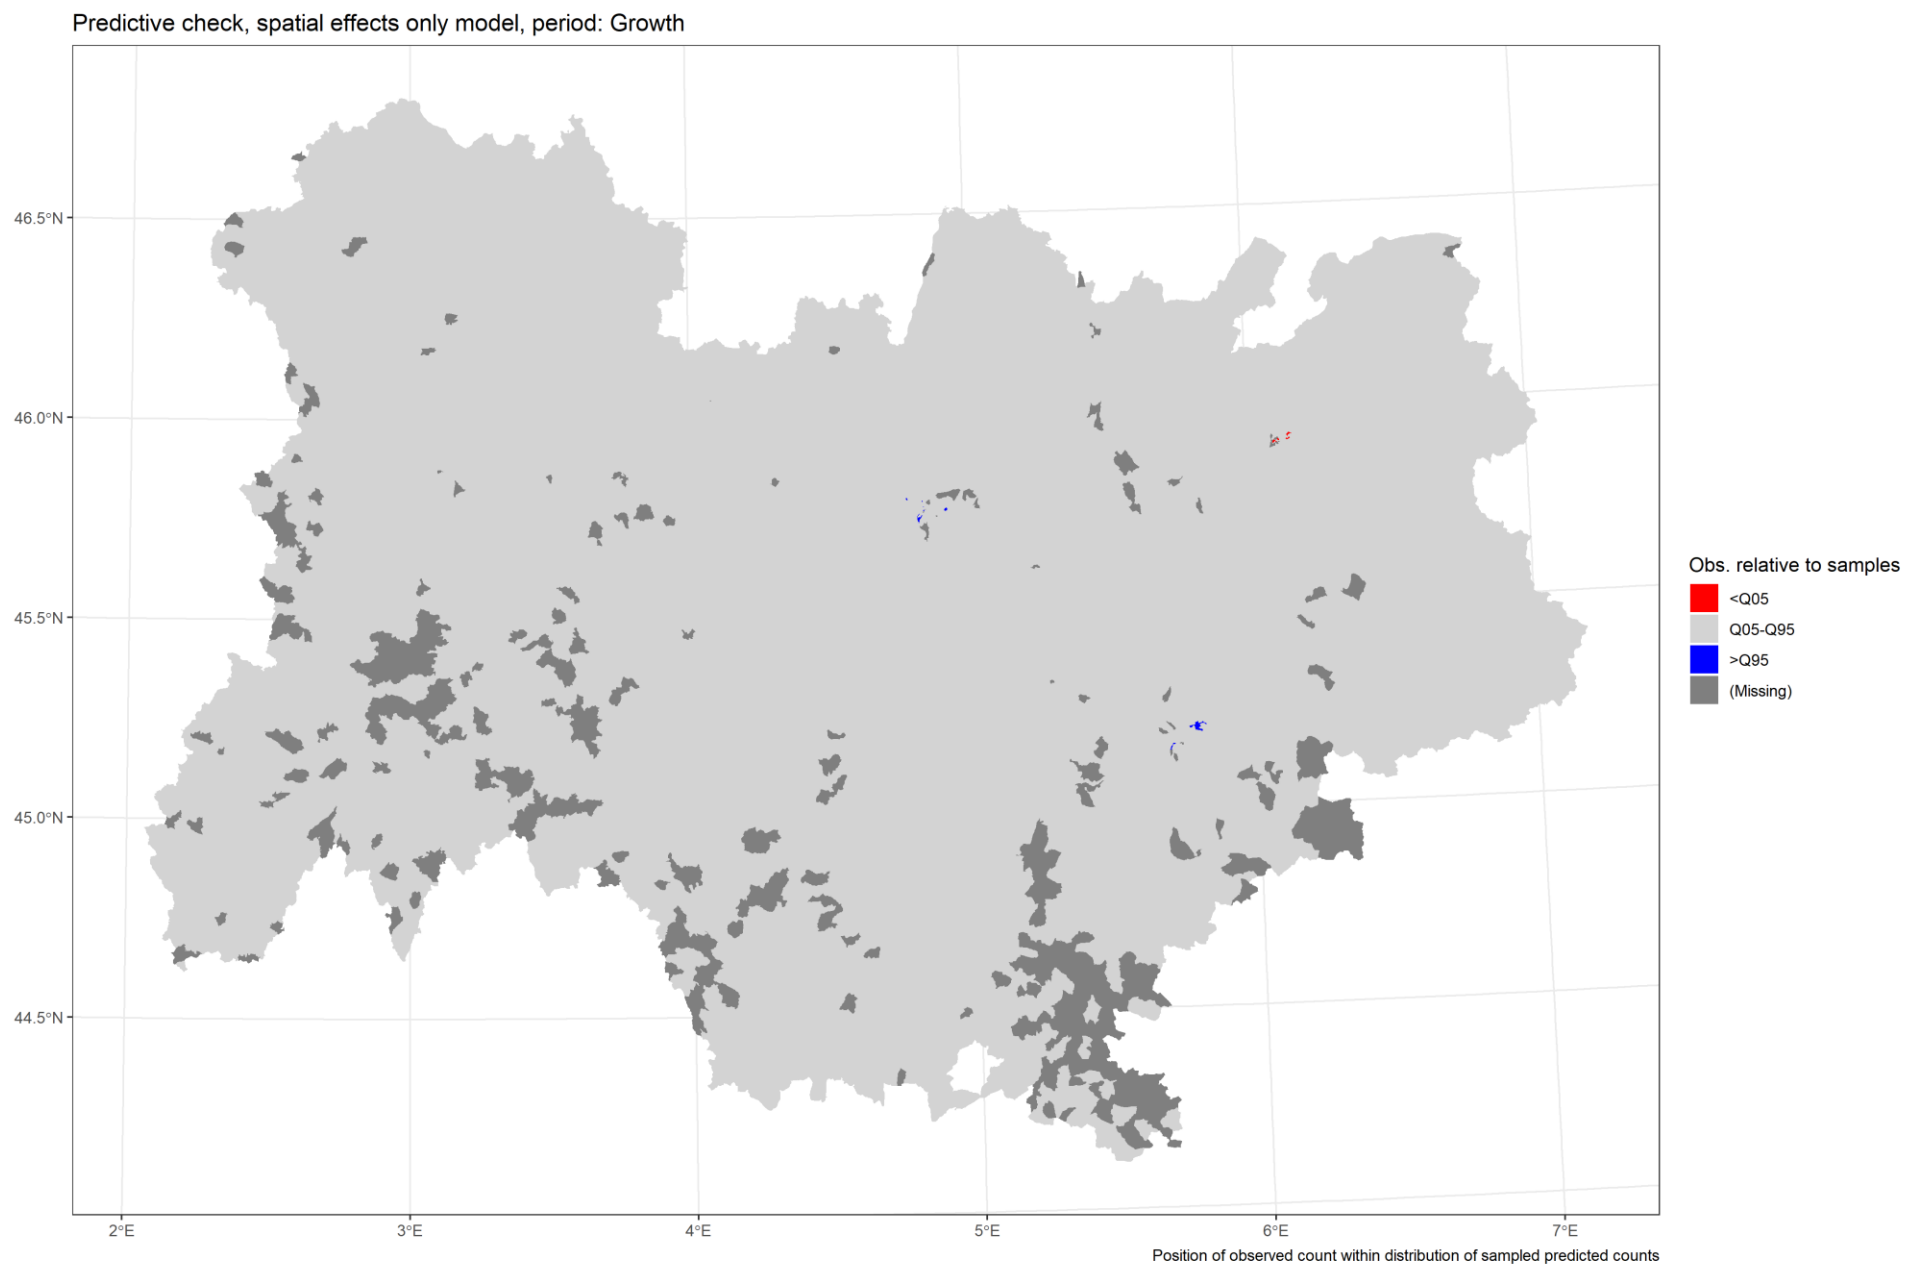

Figure 15 Predictive check, M3, growth



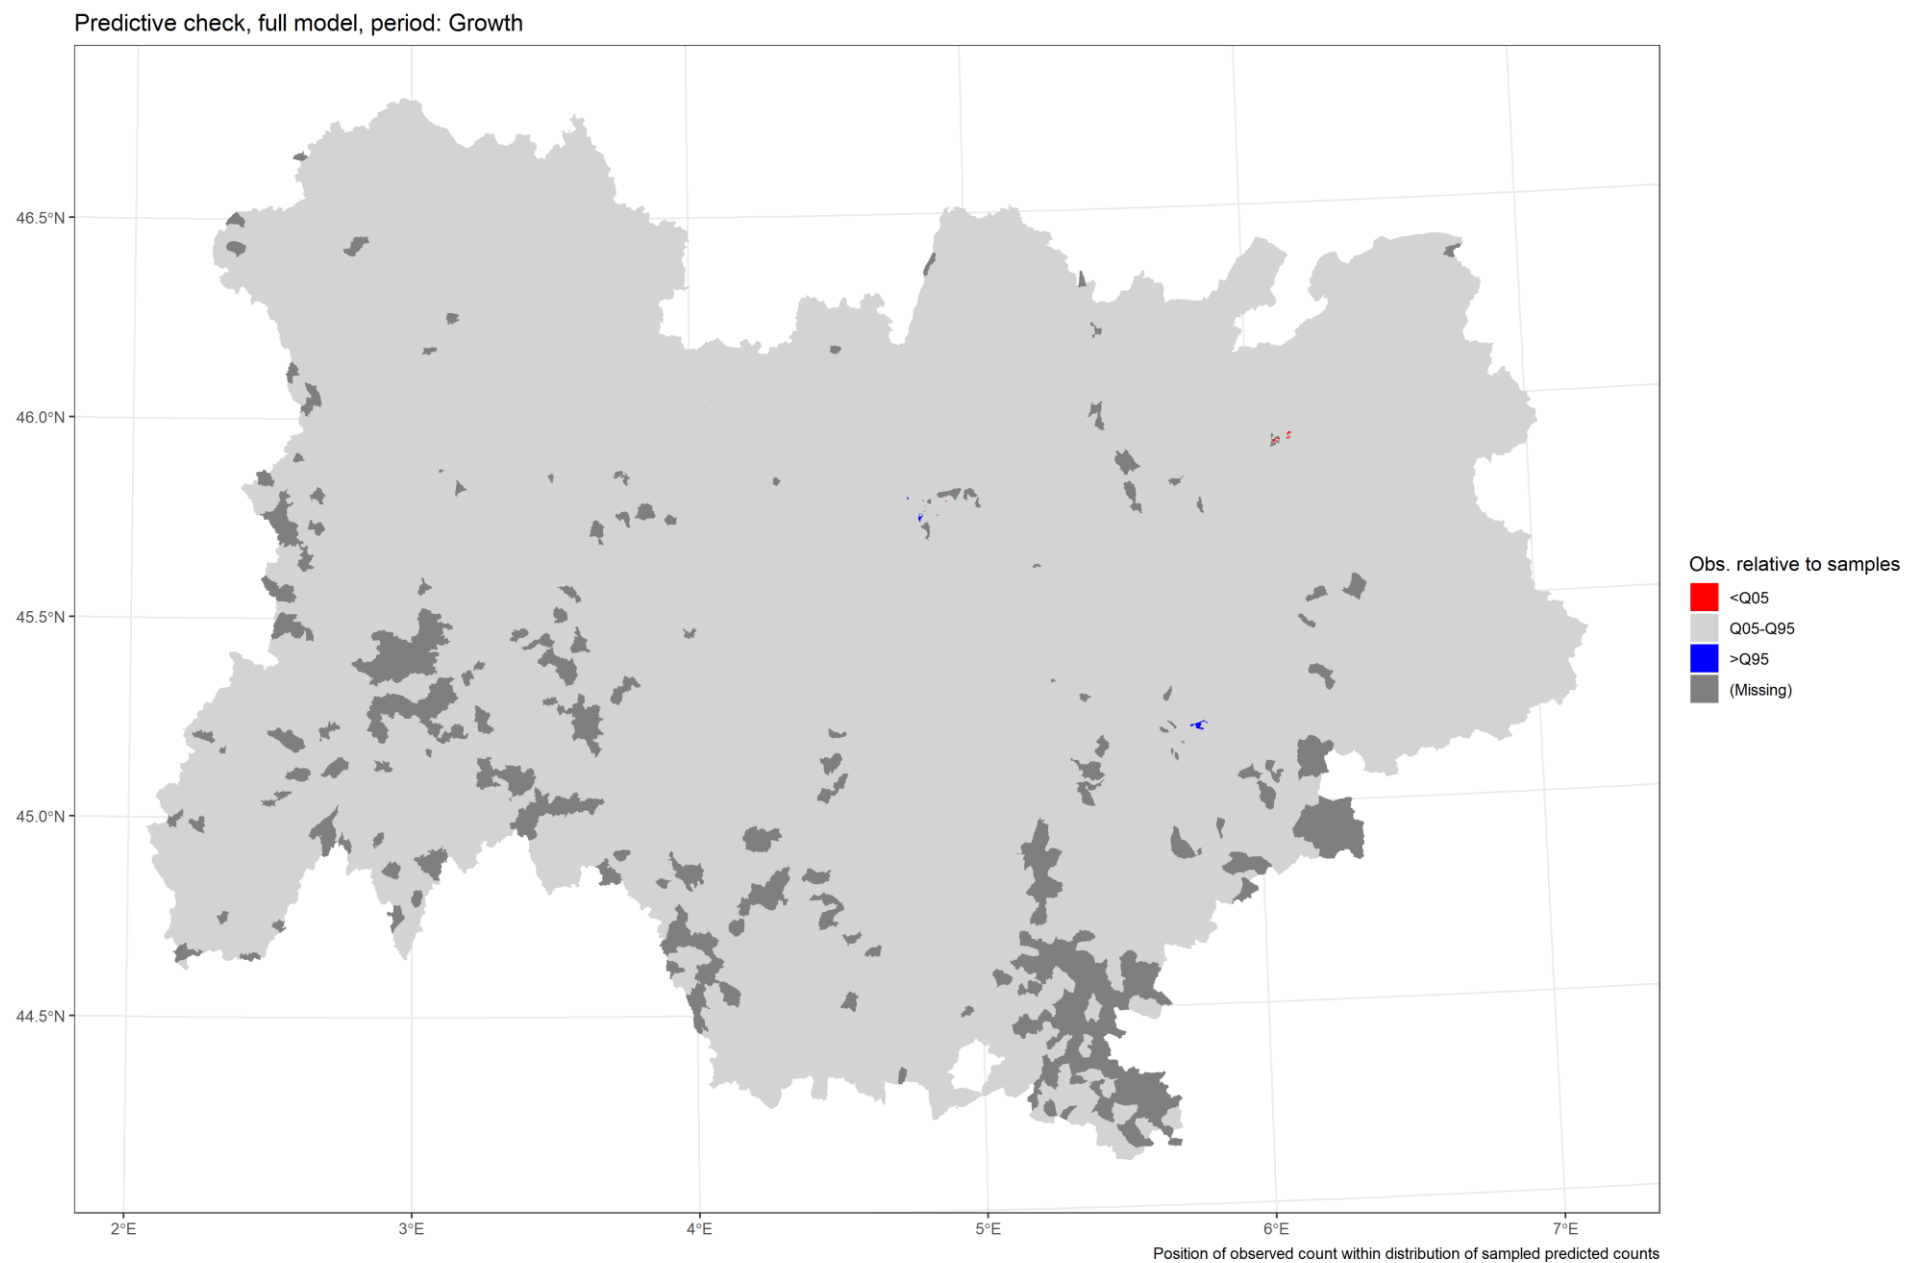

Figure 16 Predictive check, M4, growth

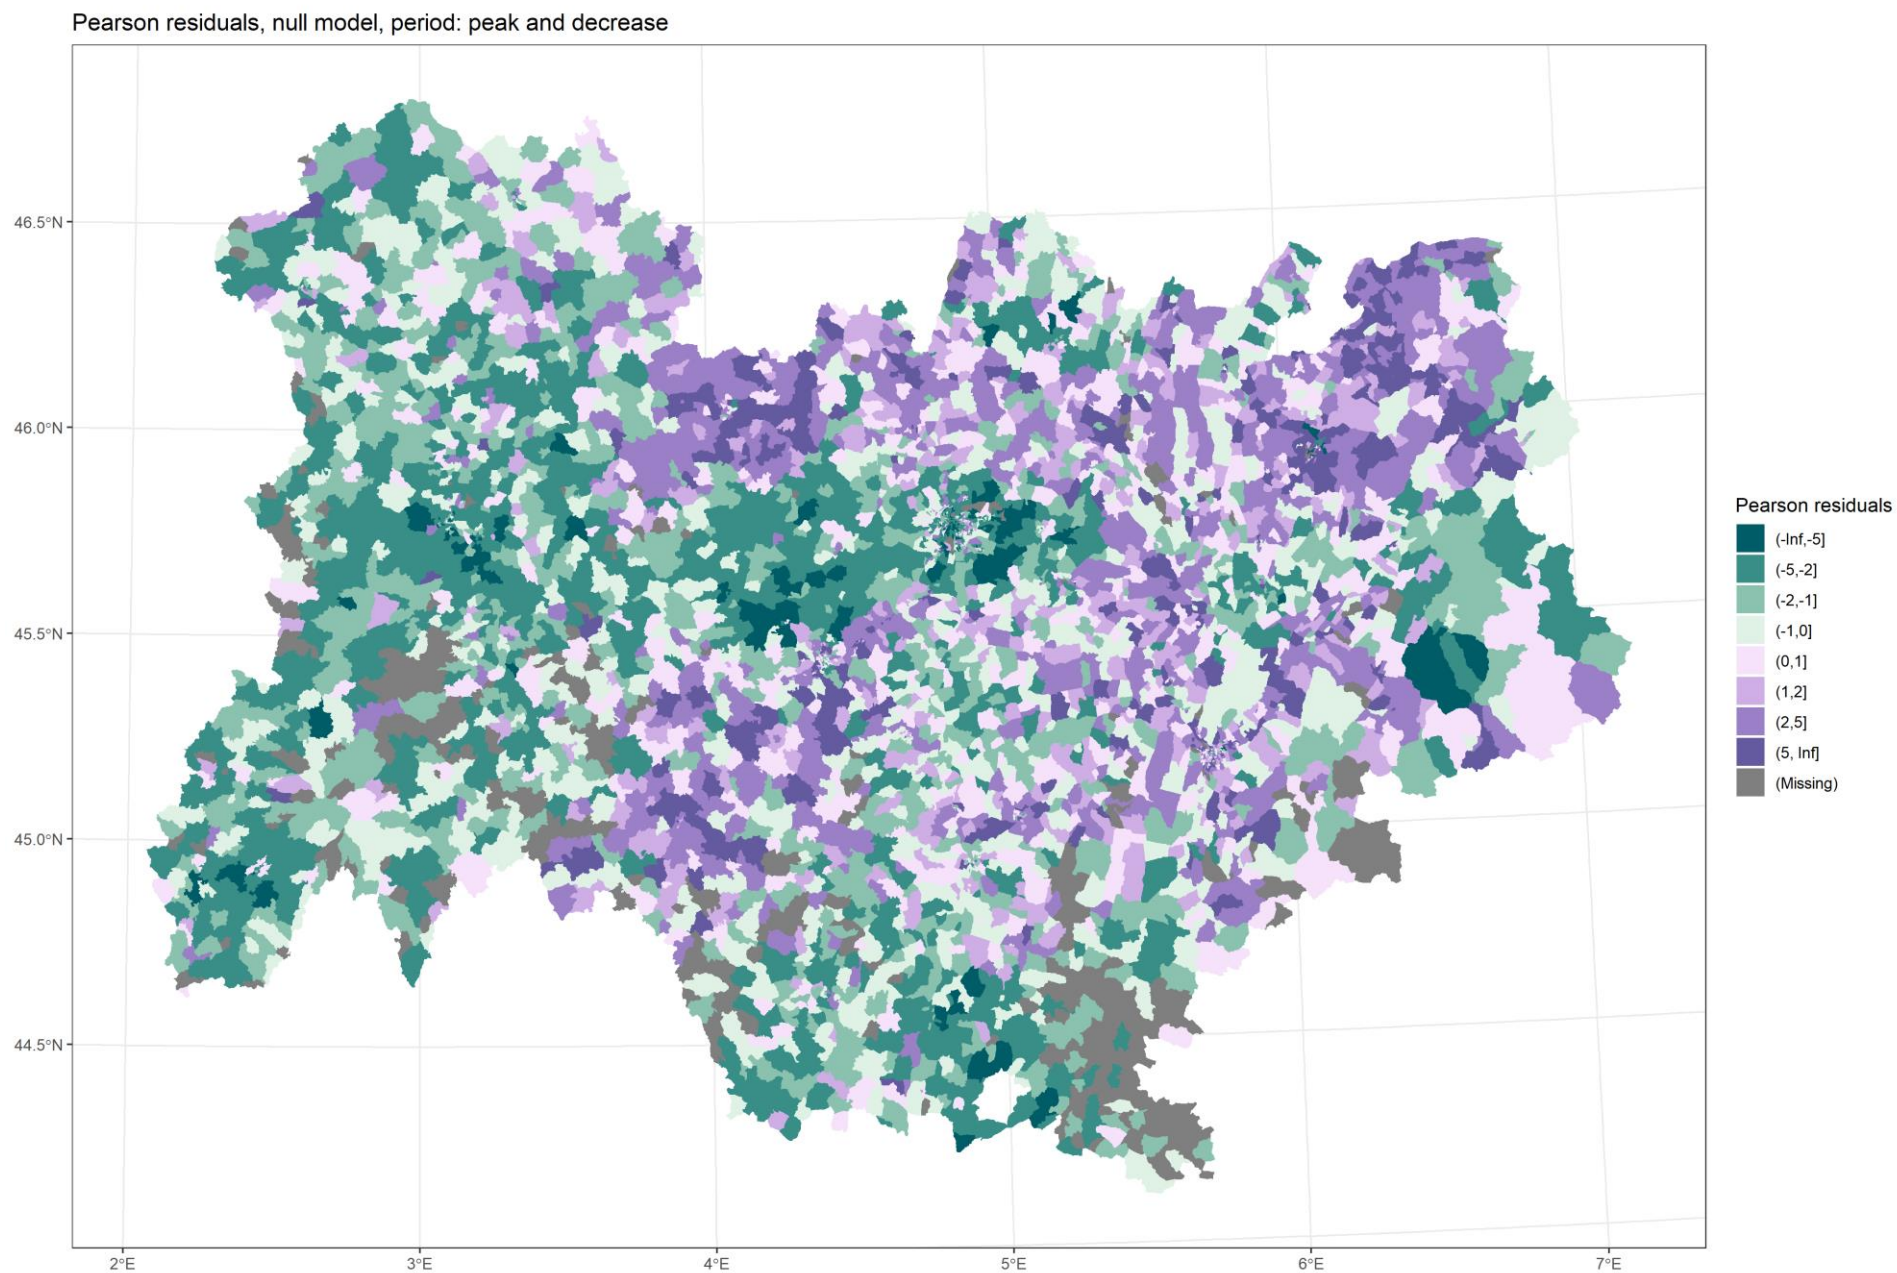

Figure 17 Residuals, M1, peak and decrease

Pearson residuals, covariates only model, period: peak and decrease

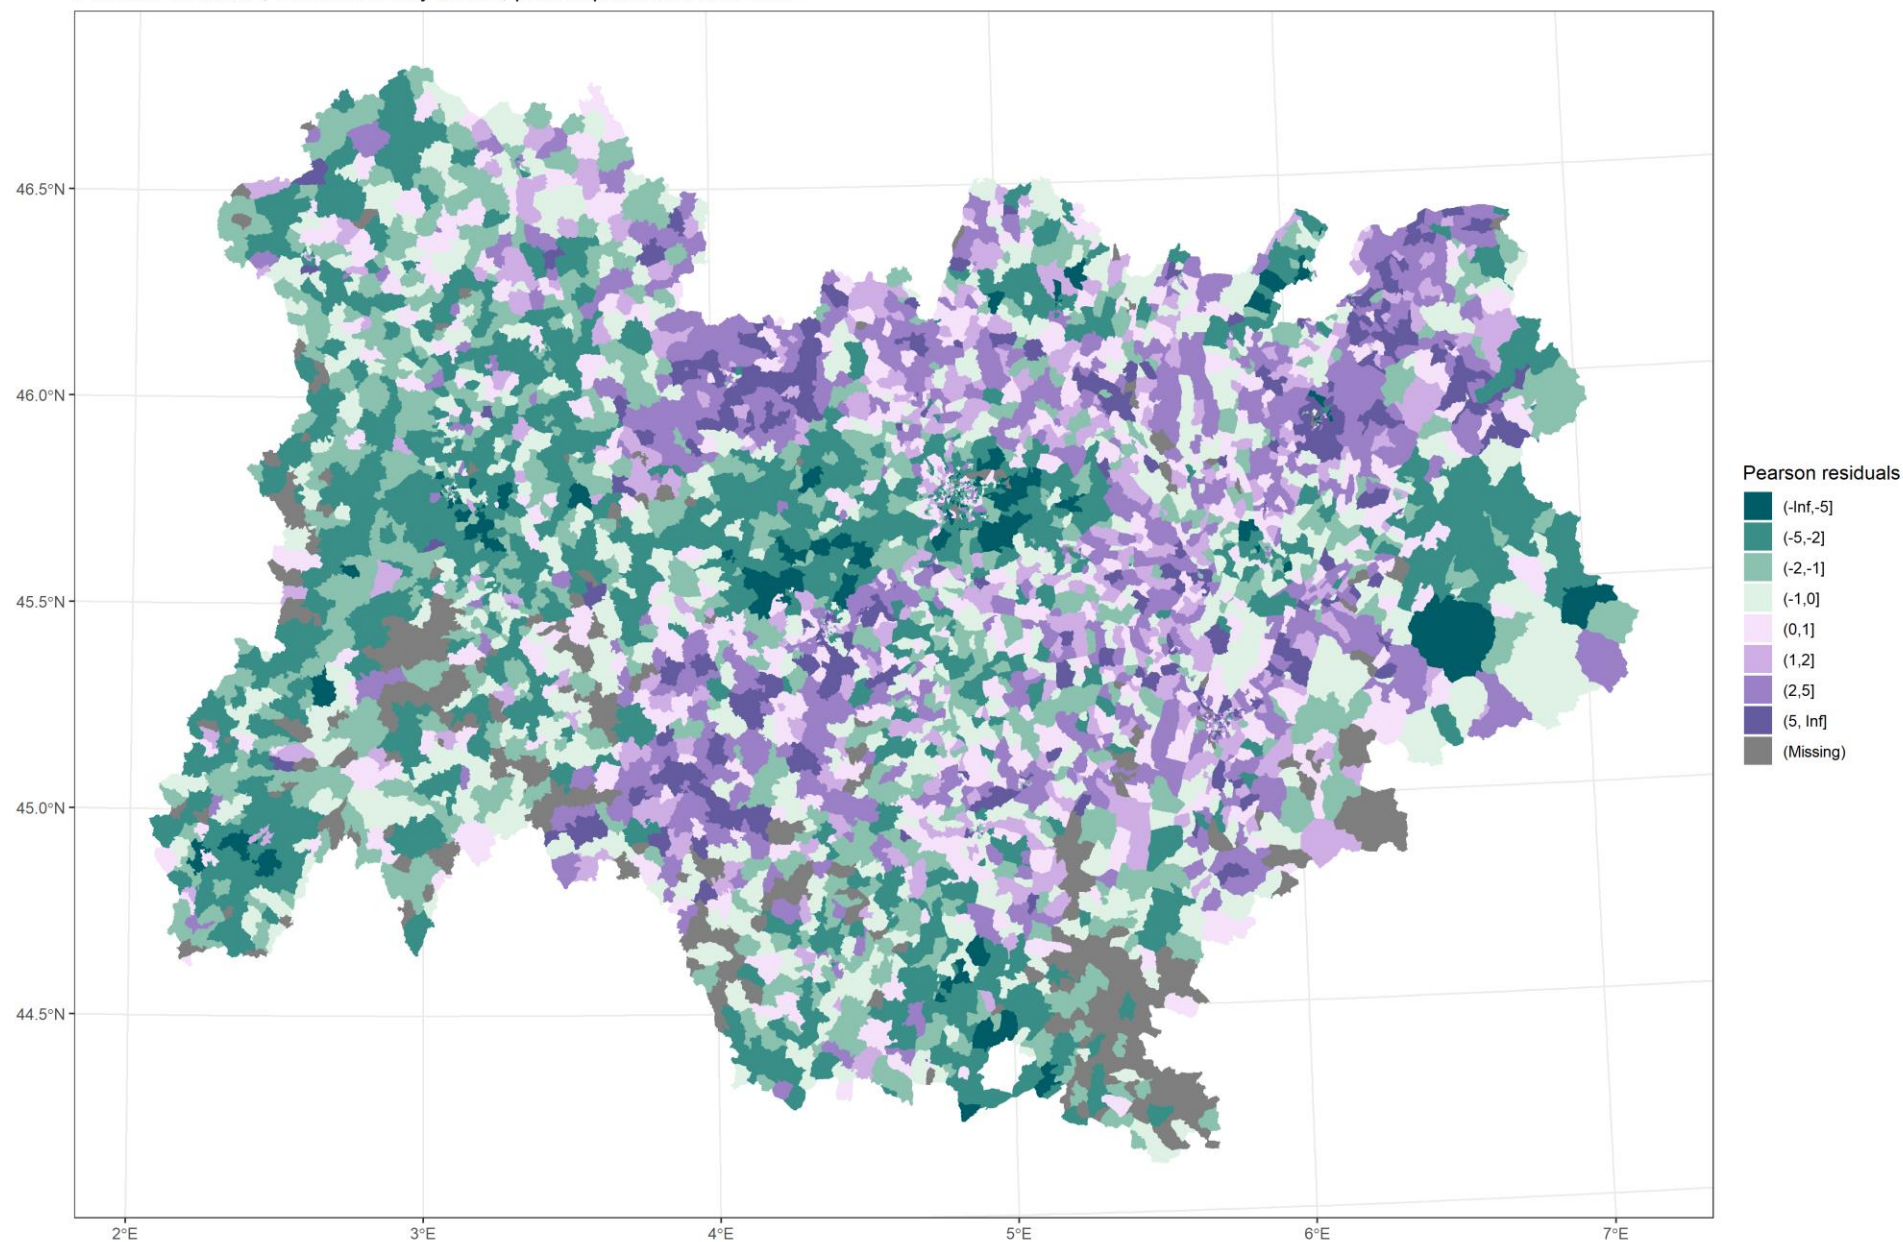

Figure 18 Residuals, M2, peak and decrease



Pearson residuals, spatial effects only model, period: peak and decrease

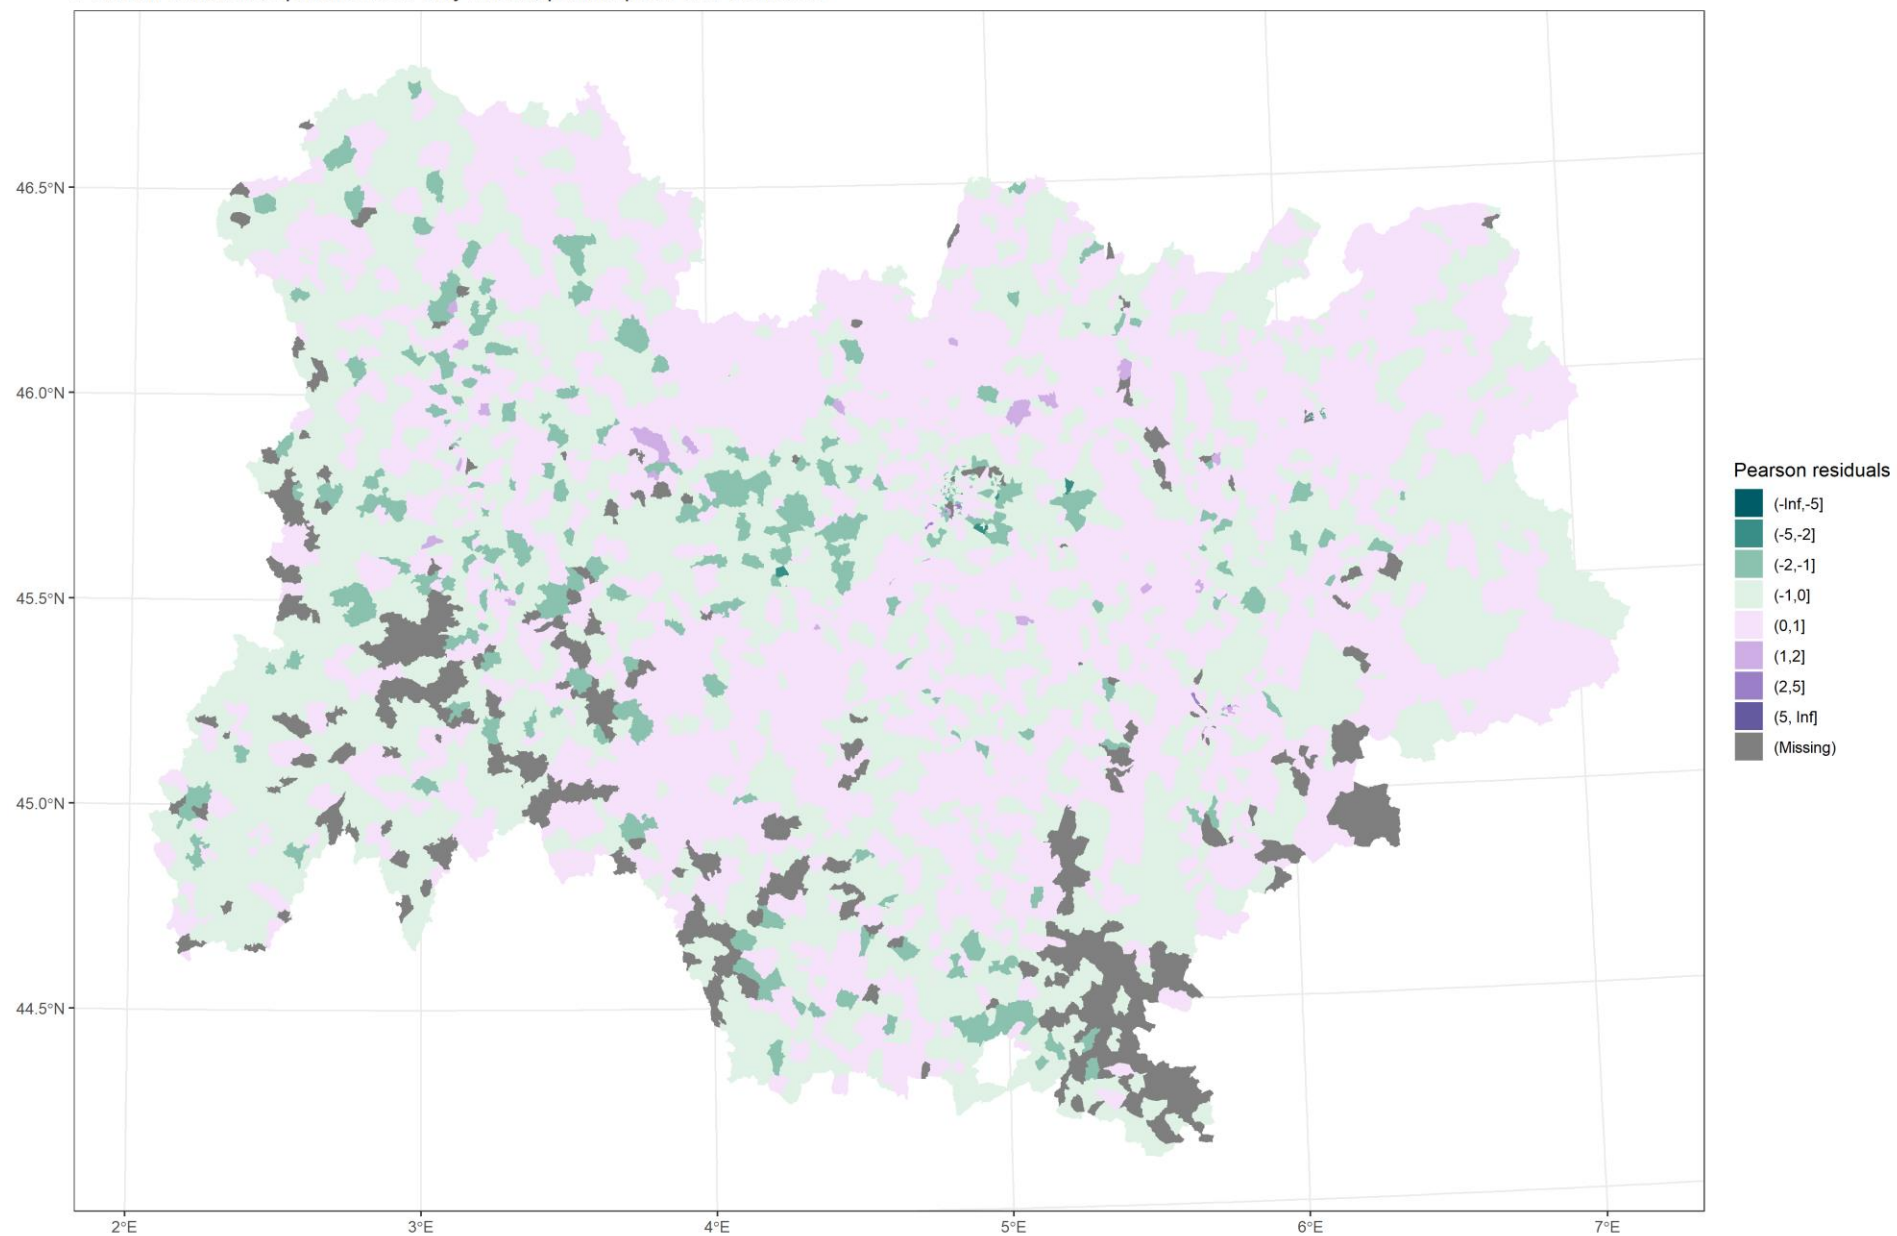

Figure 19 Residuals, M3, peak and decrease

Pearson residuals, full model, period: peak and decrease

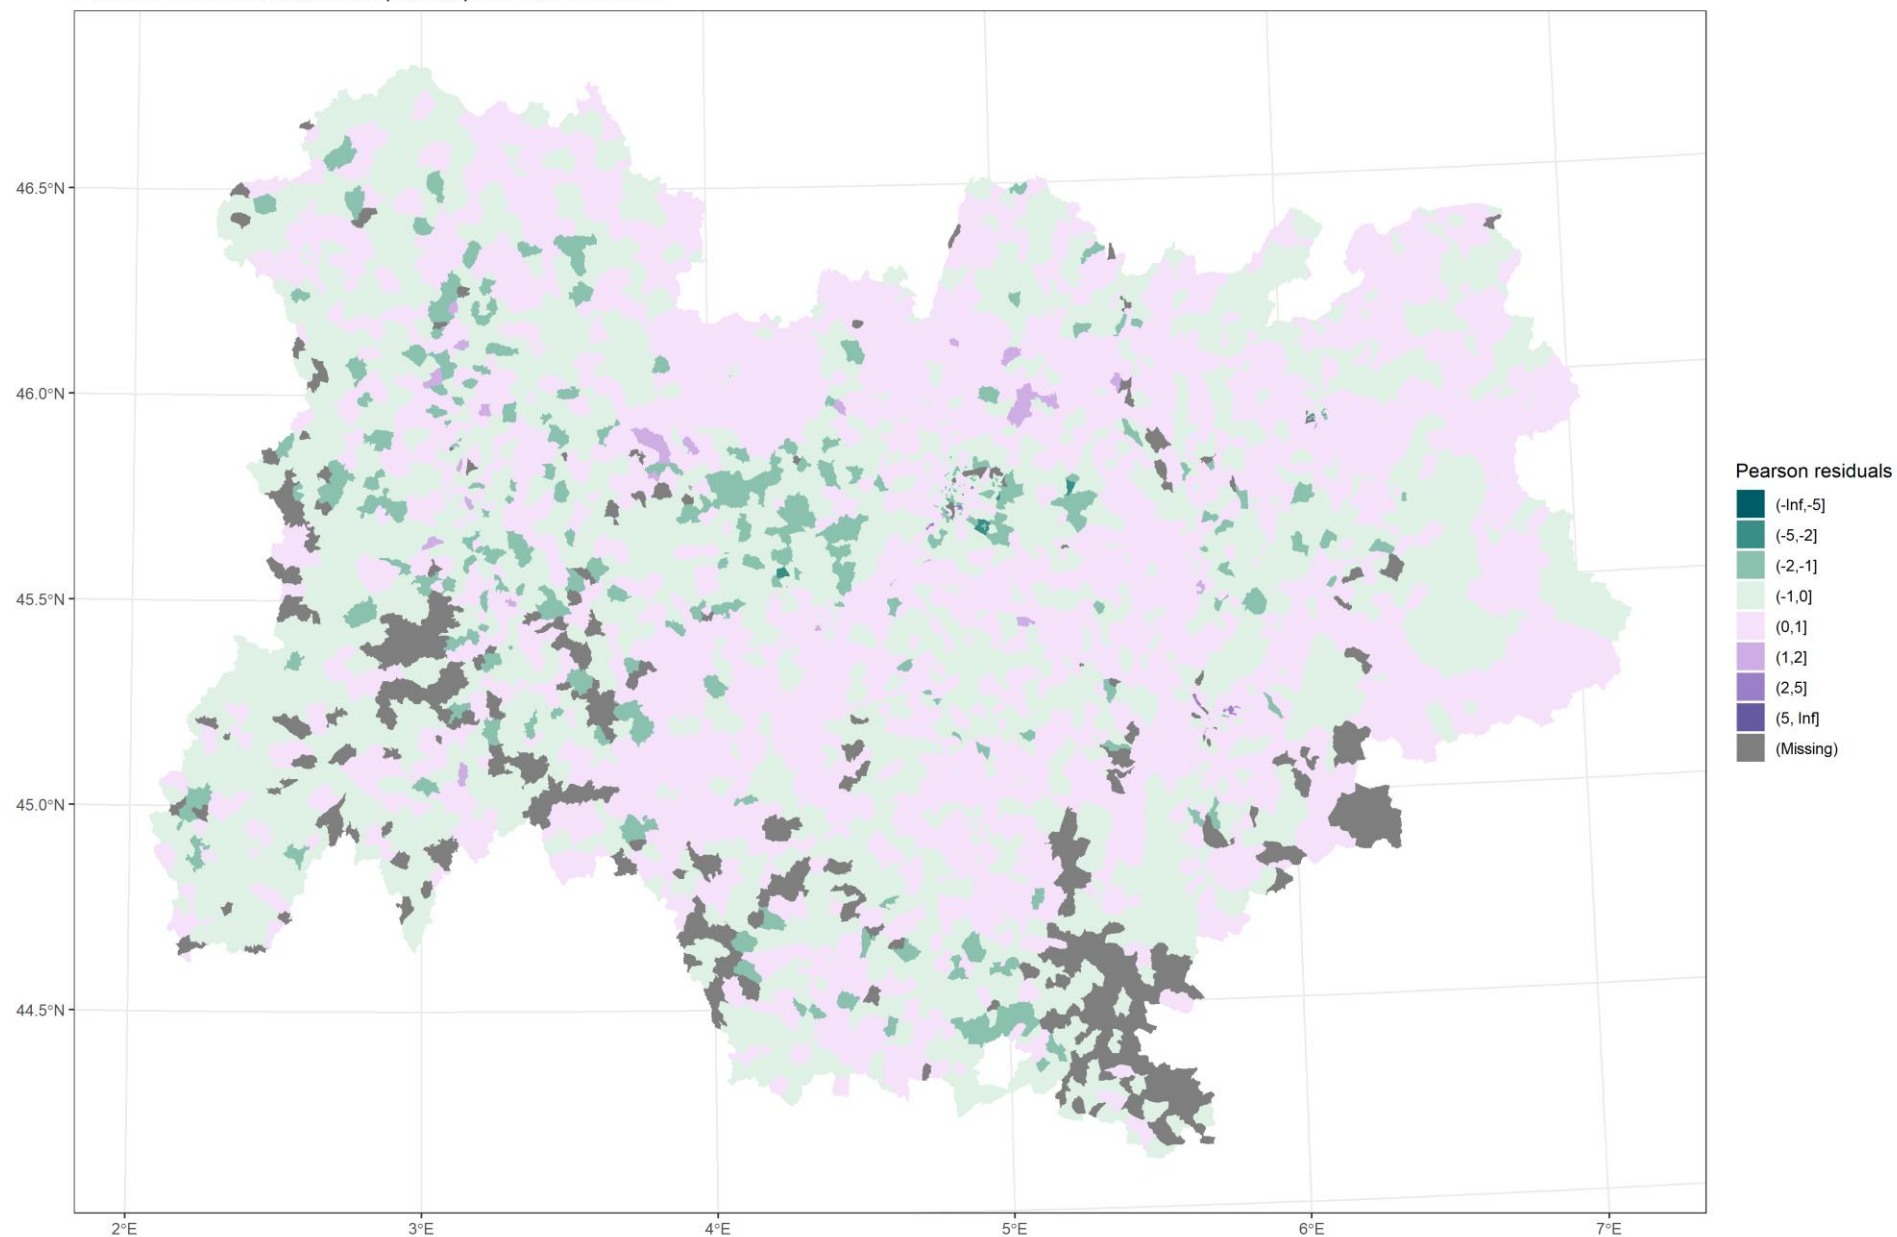

Figure 20 Residuals, M4, peak and decrease

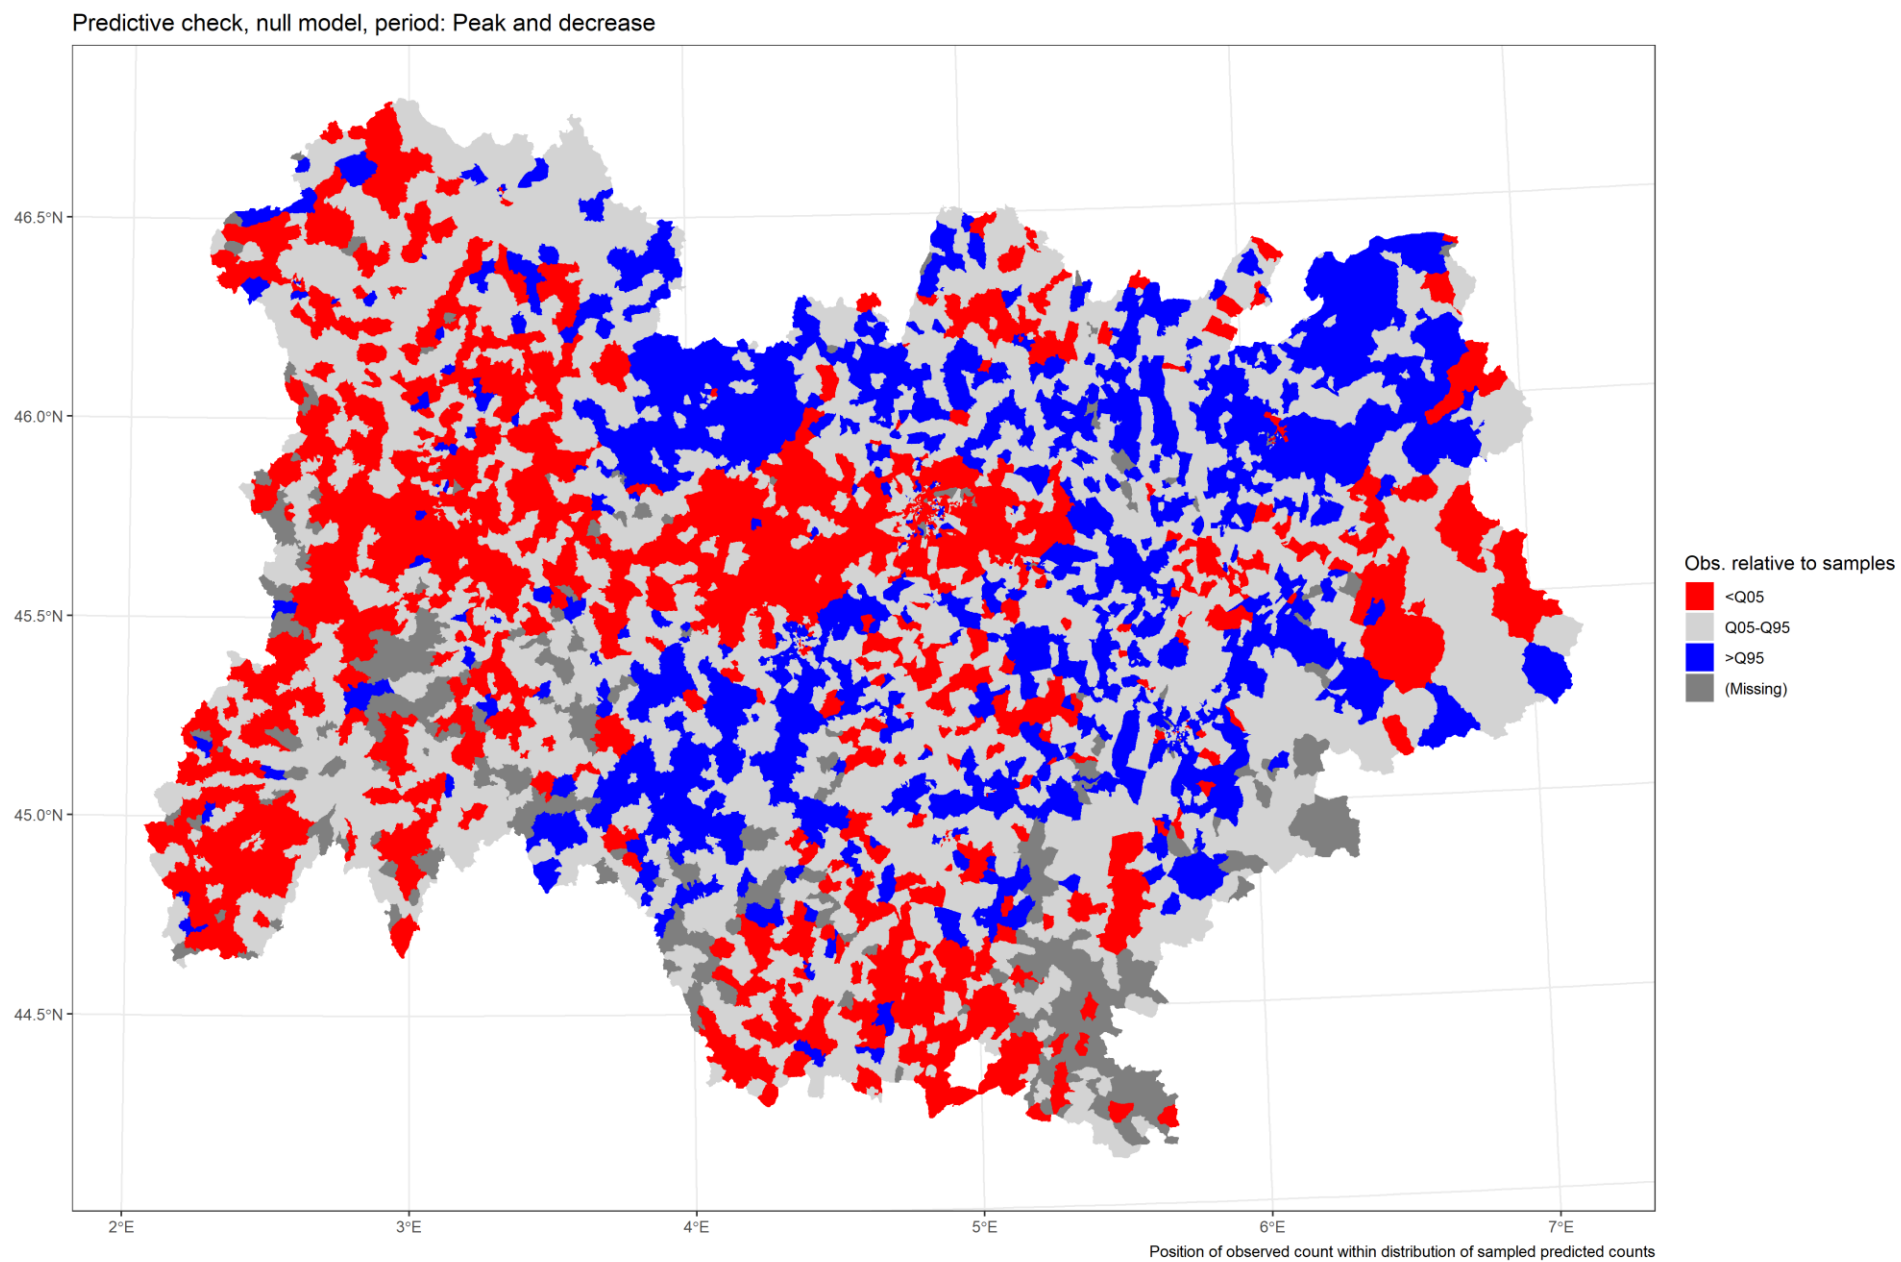

Figure 21 Predictive check, M1, peak and decrease

Predictive check, covariates only model, period: Peak and decrease

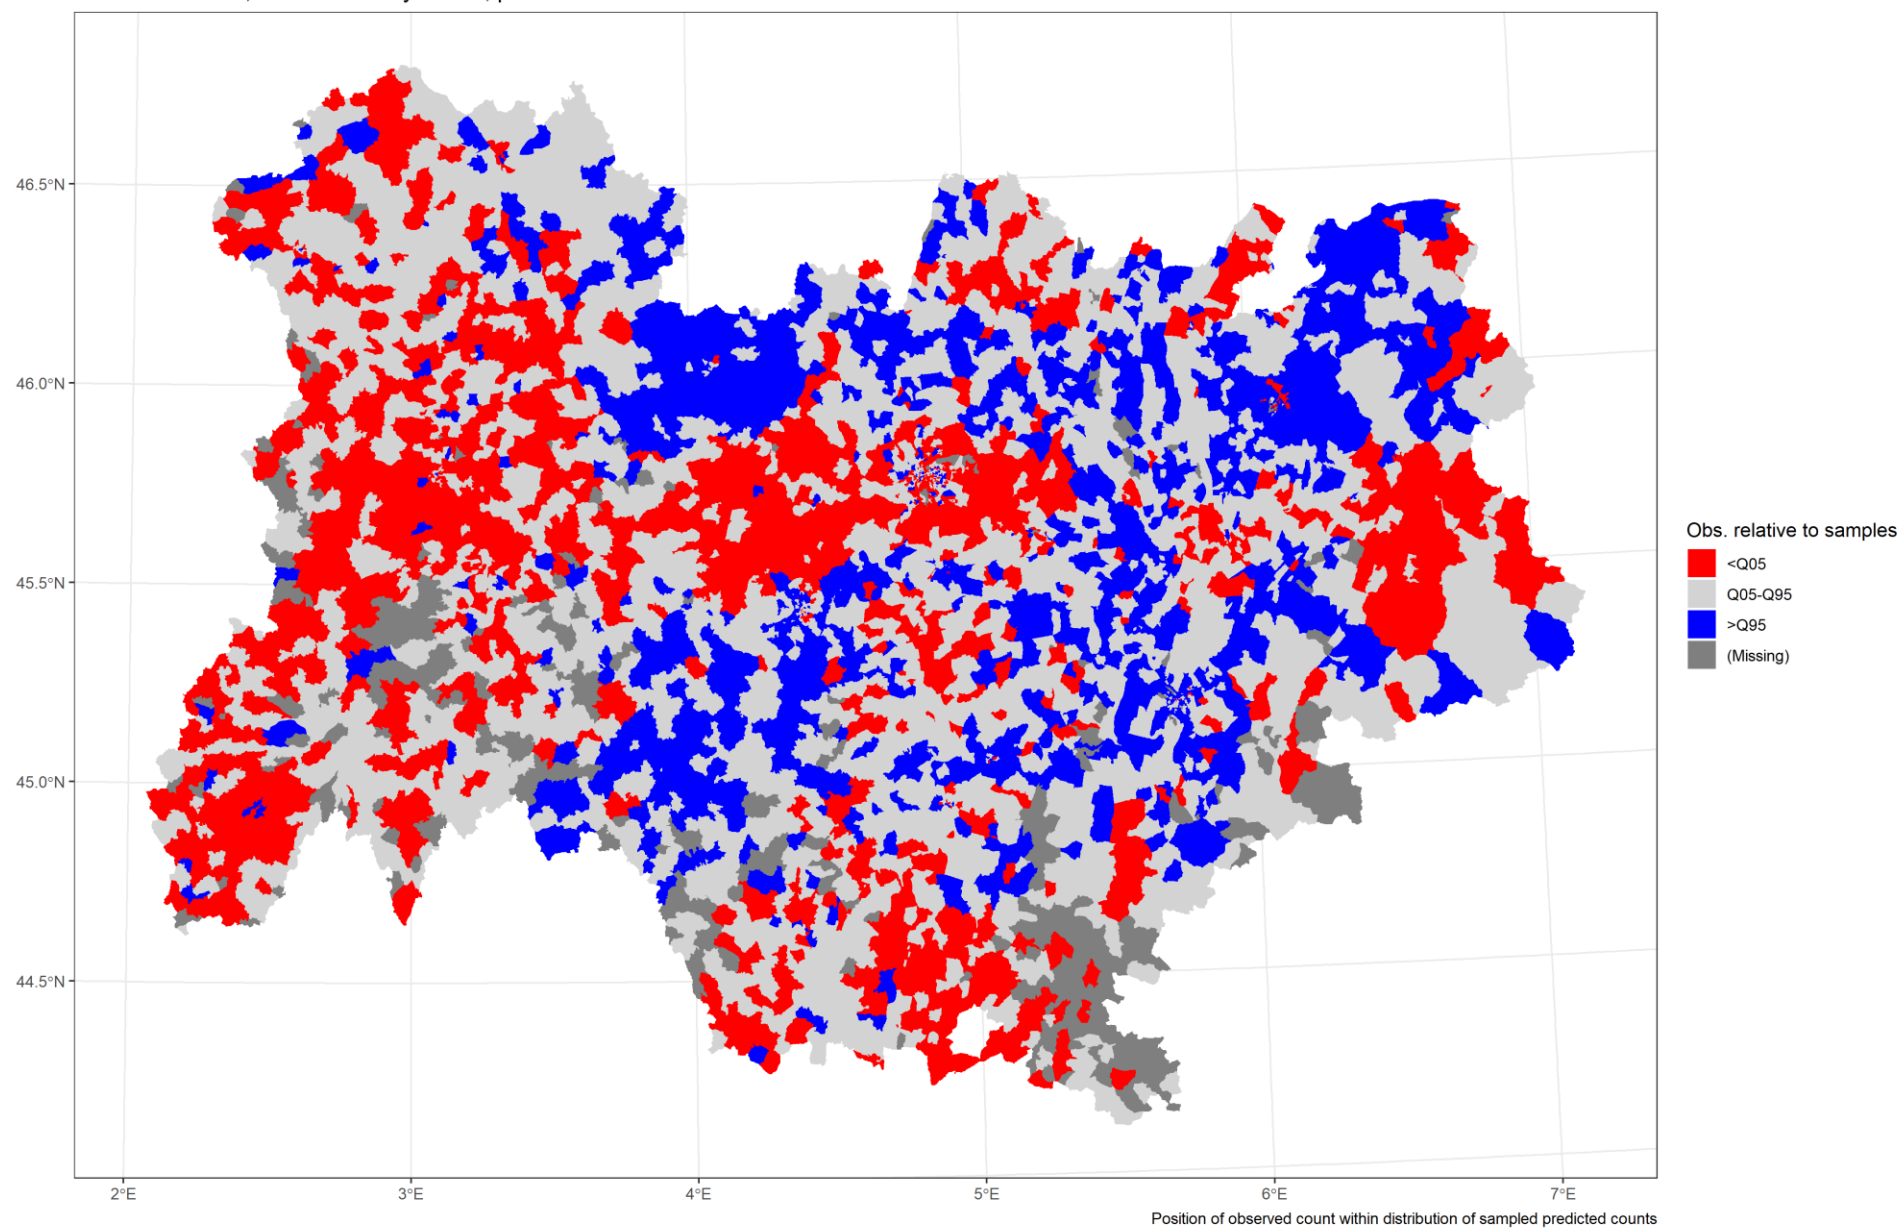

Figure 22 Predictive check, M2, peak and decrease



Predictive check, spatial effects only model, period: Peak and decrease

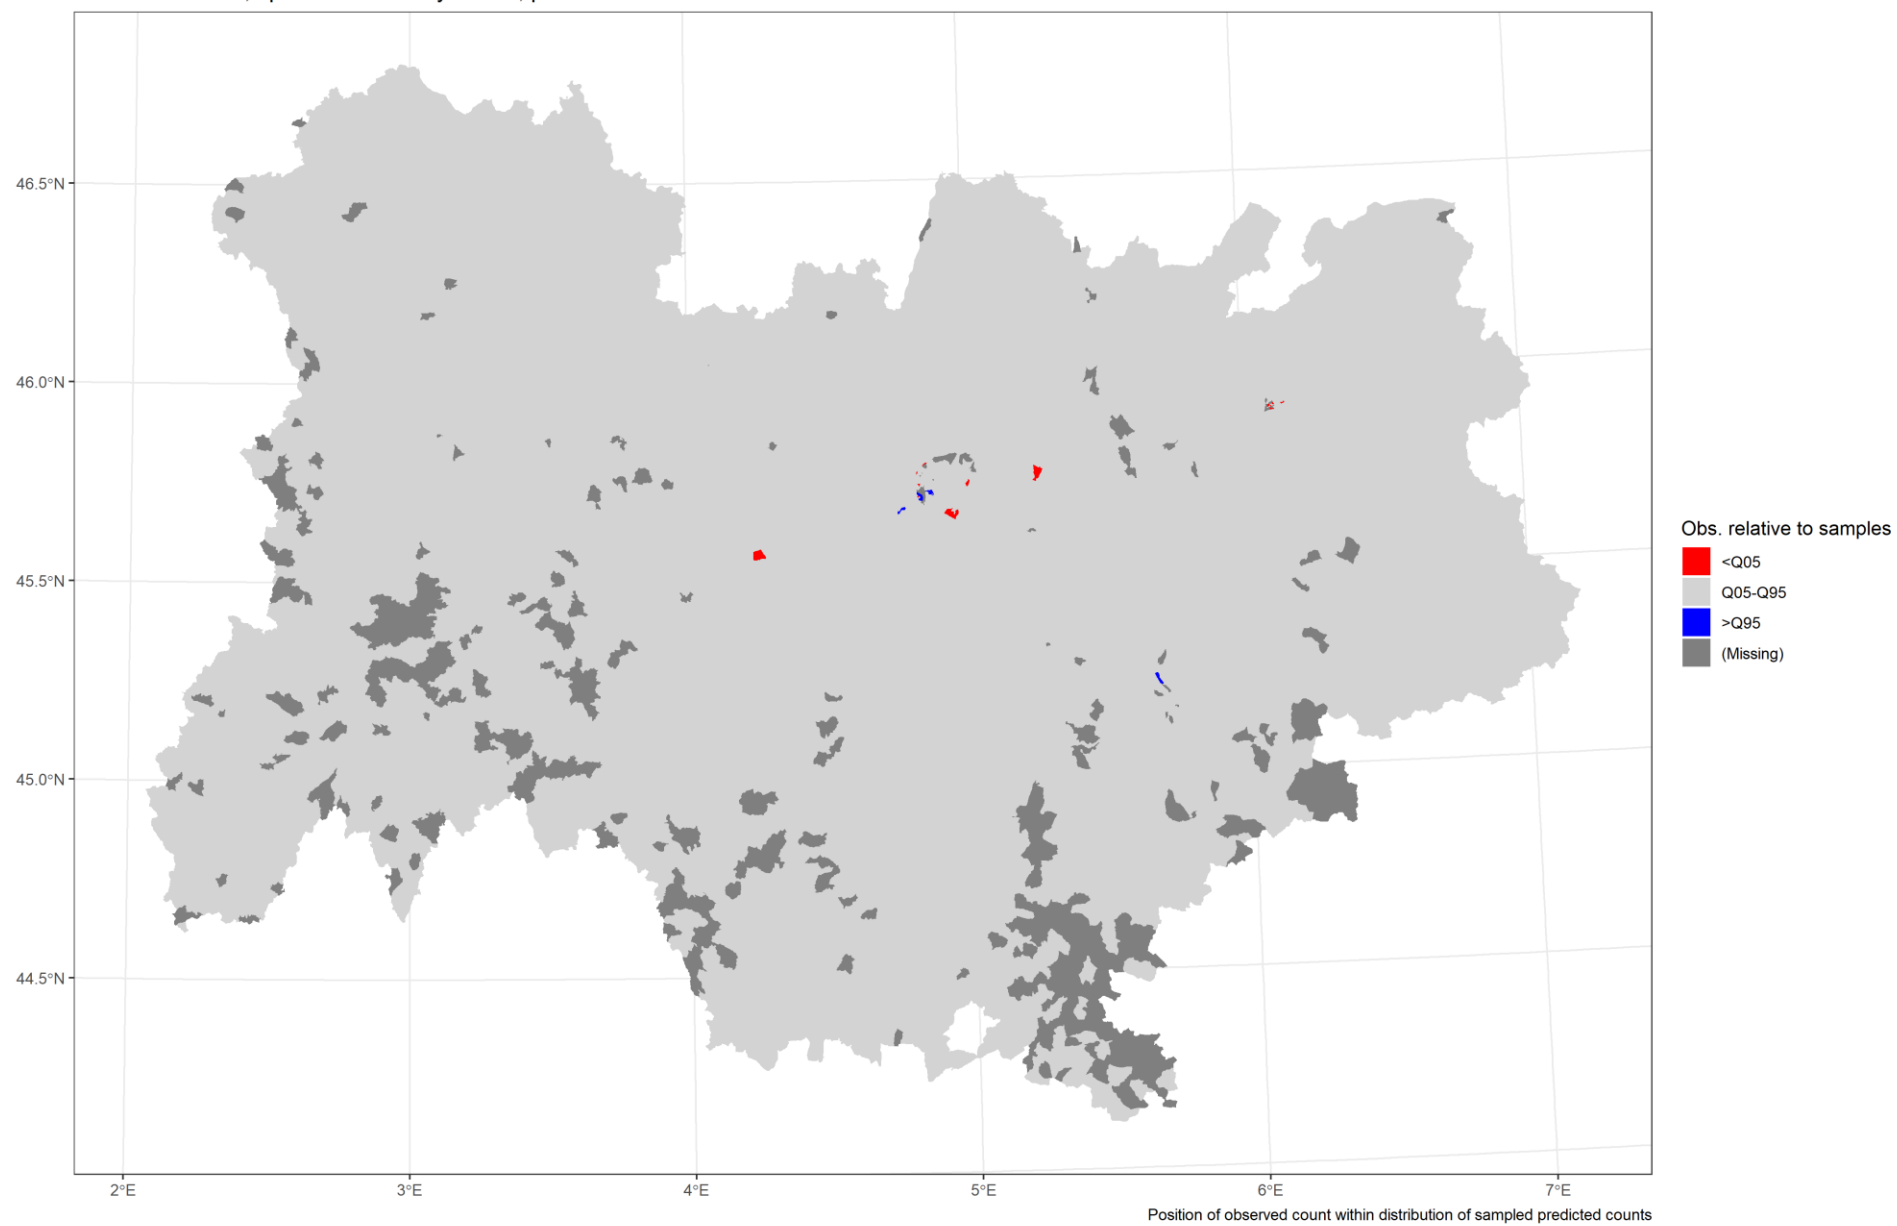

Figure 23 Predictive check, M3, peak and decrease

Predictive check, full model, period: Peak and decrease

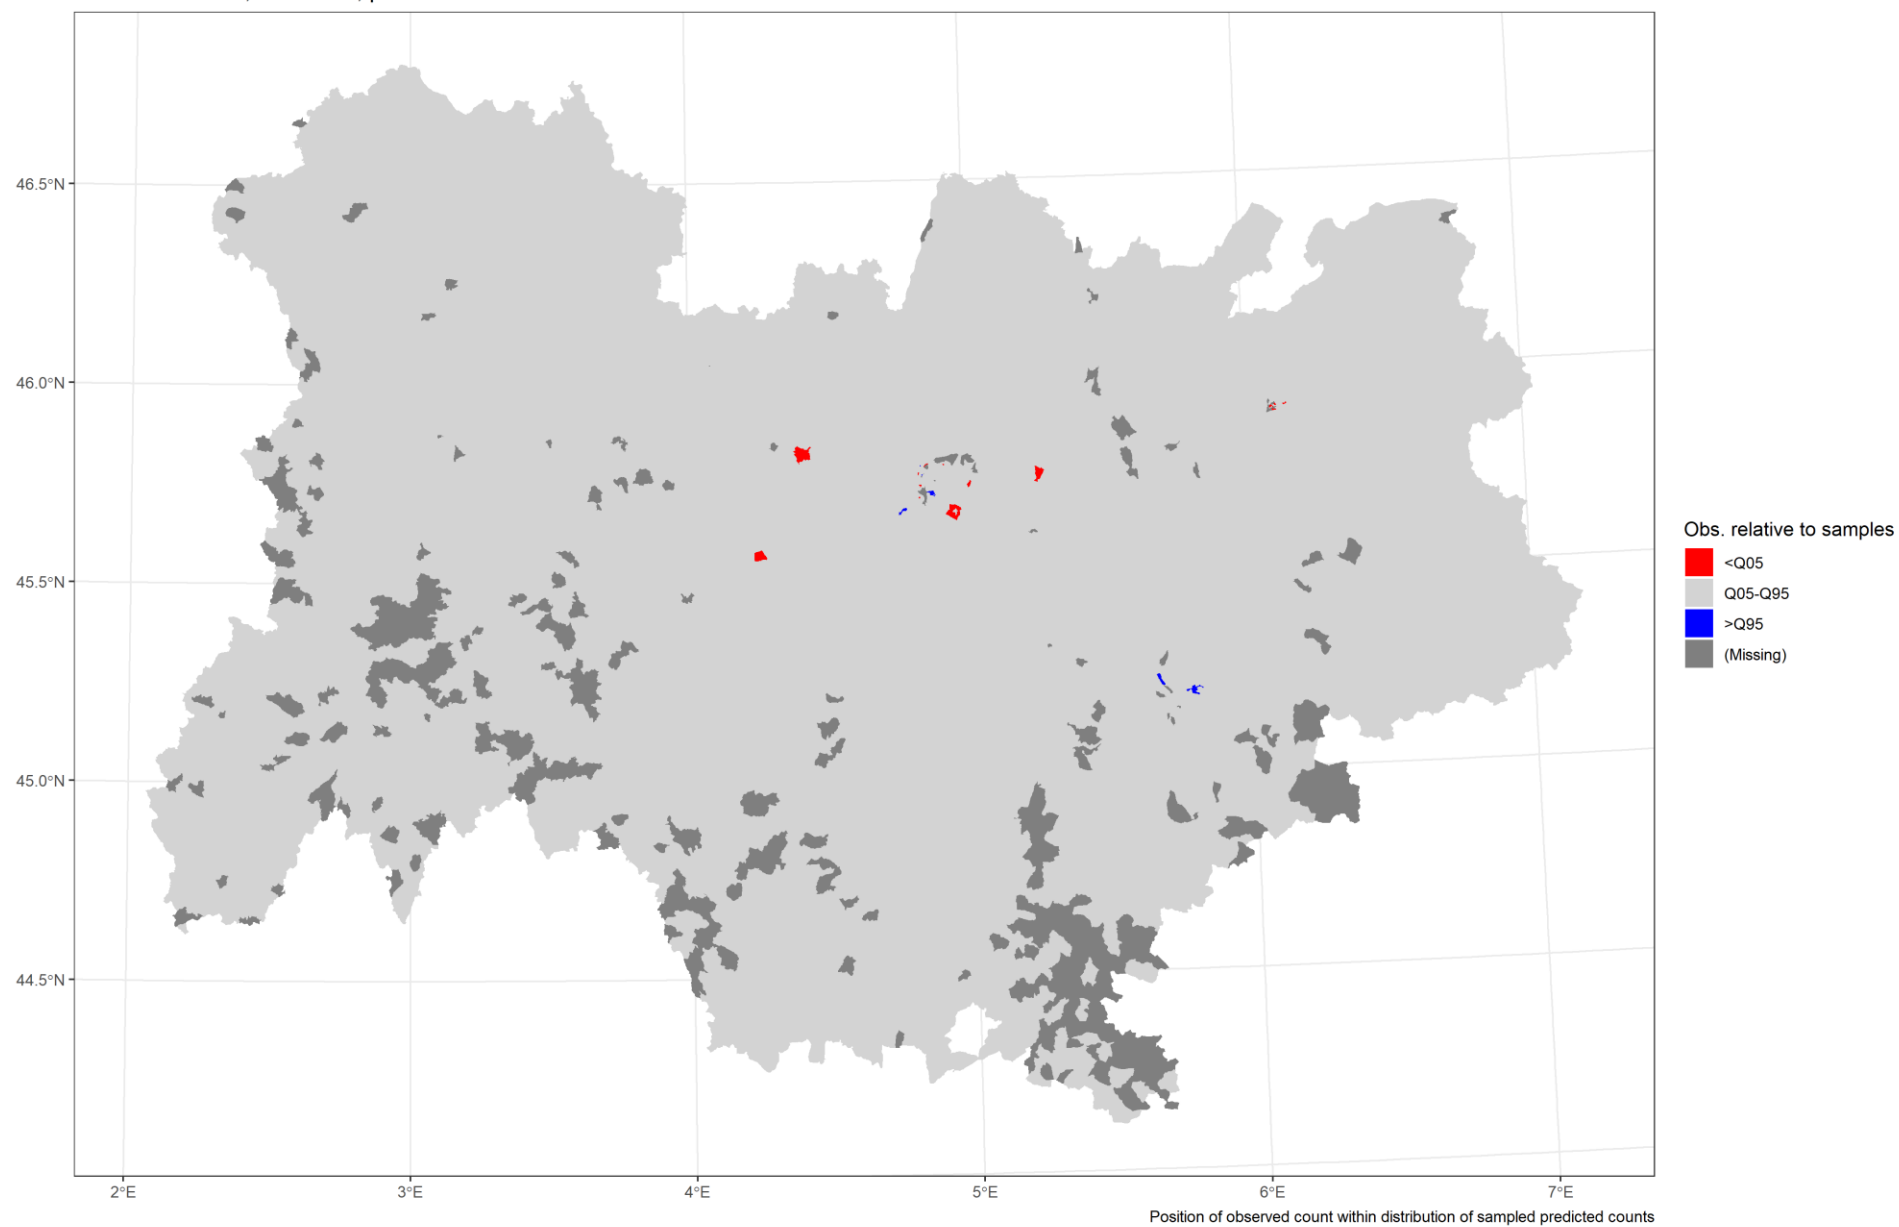

Figure 24 Predictive check, M4, peak and decrease

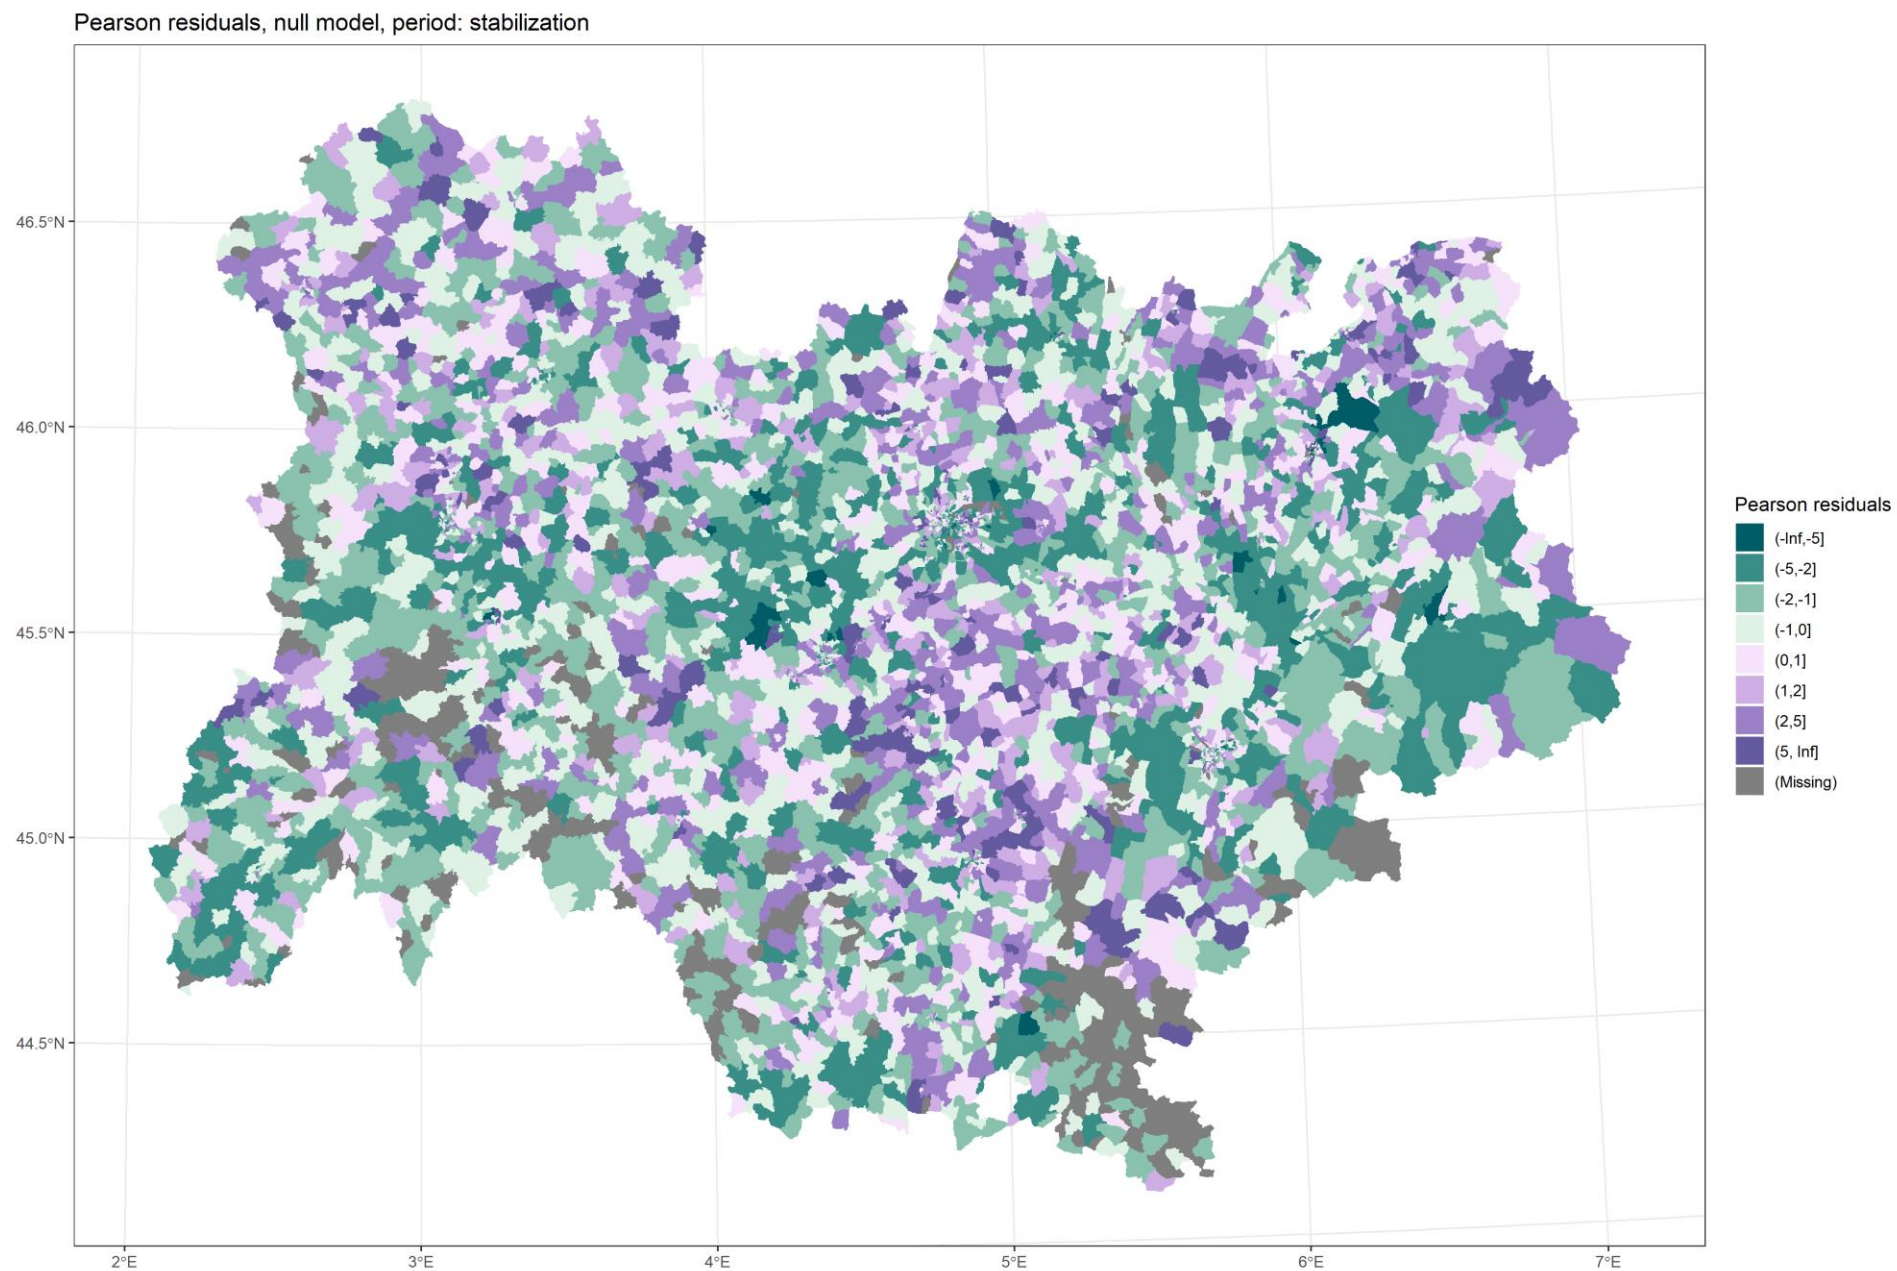

Figure 25 Residuals, M1, stabilization

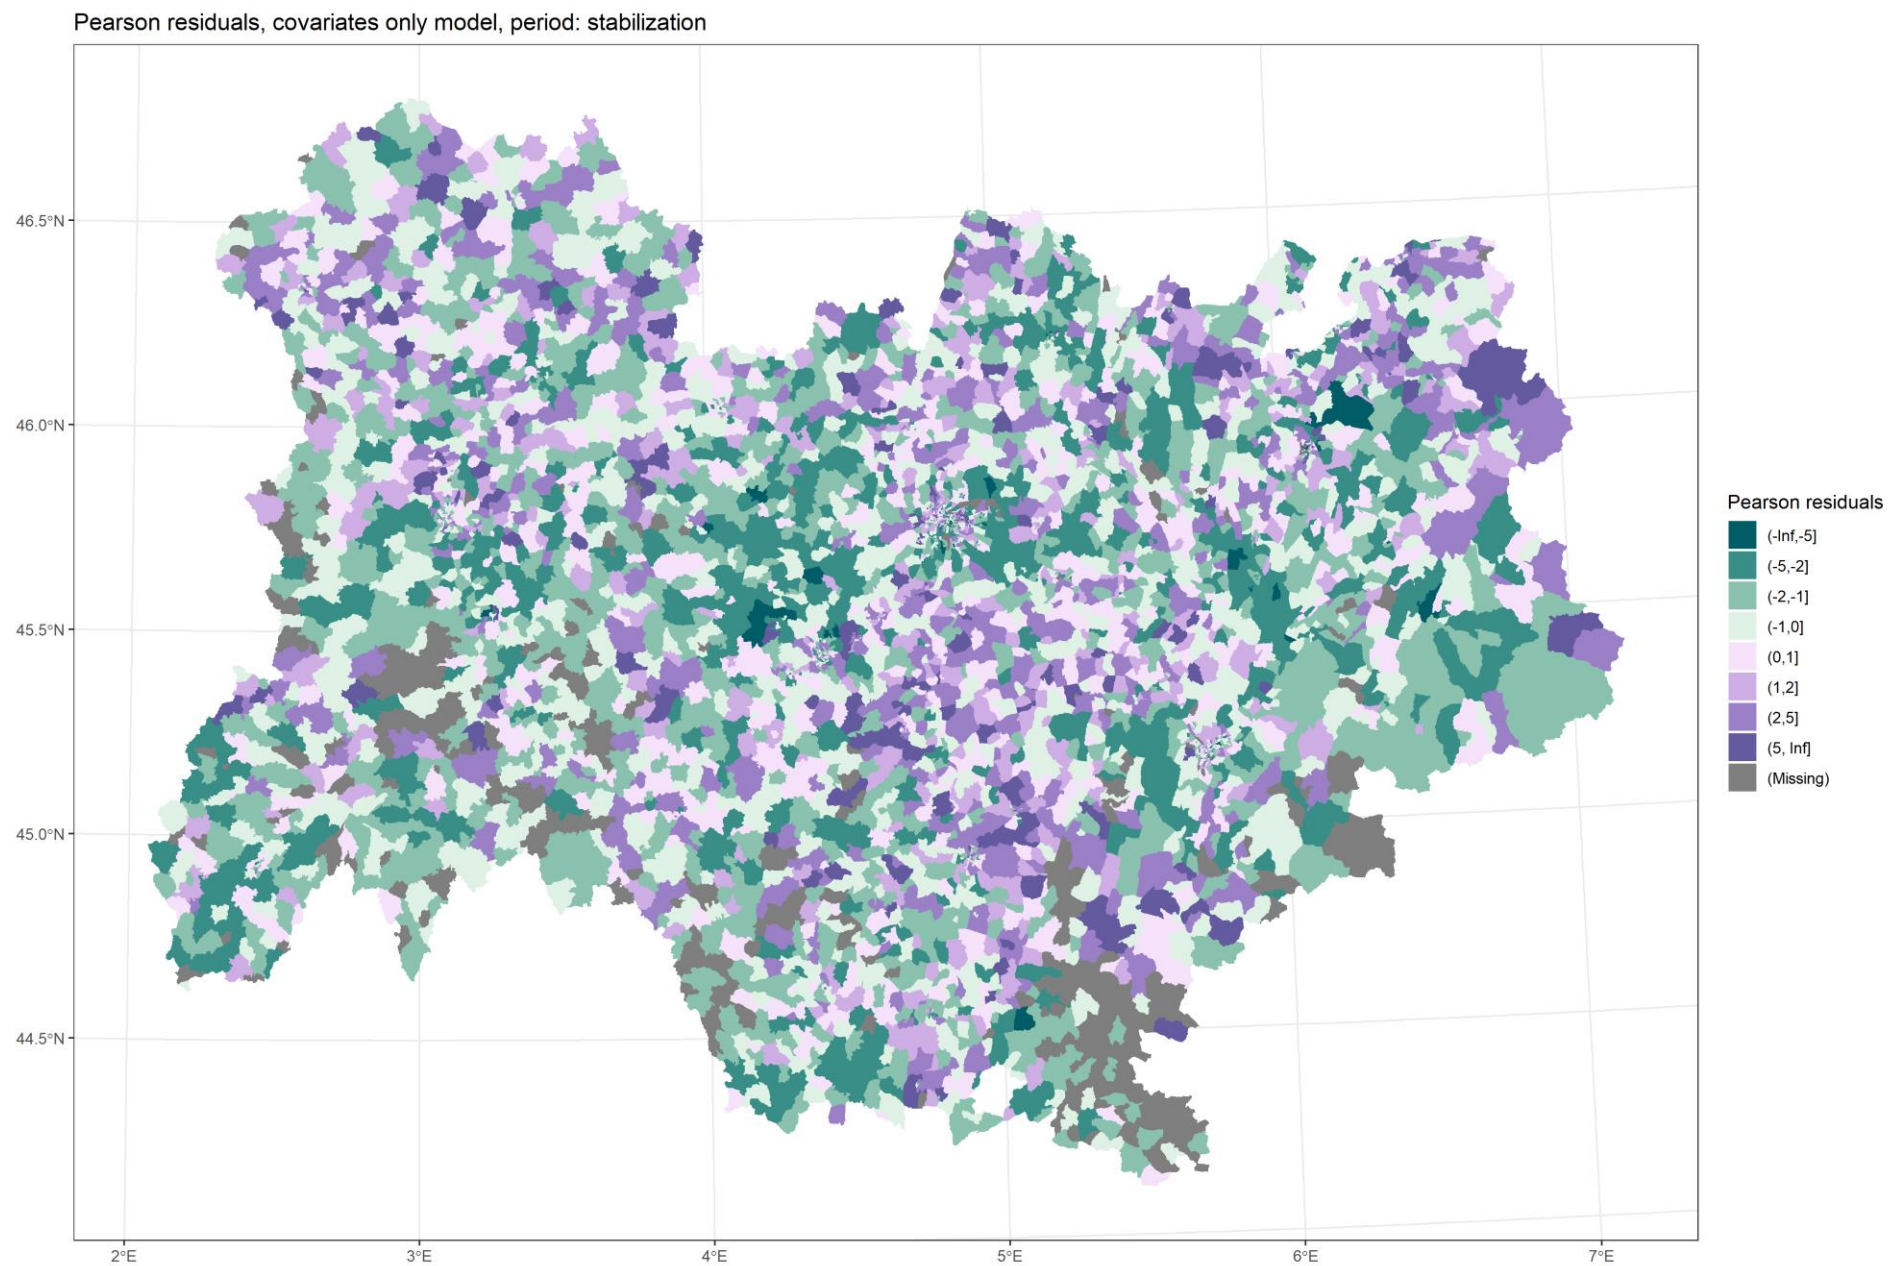

Figure 26 Residuals, M2, stabilization



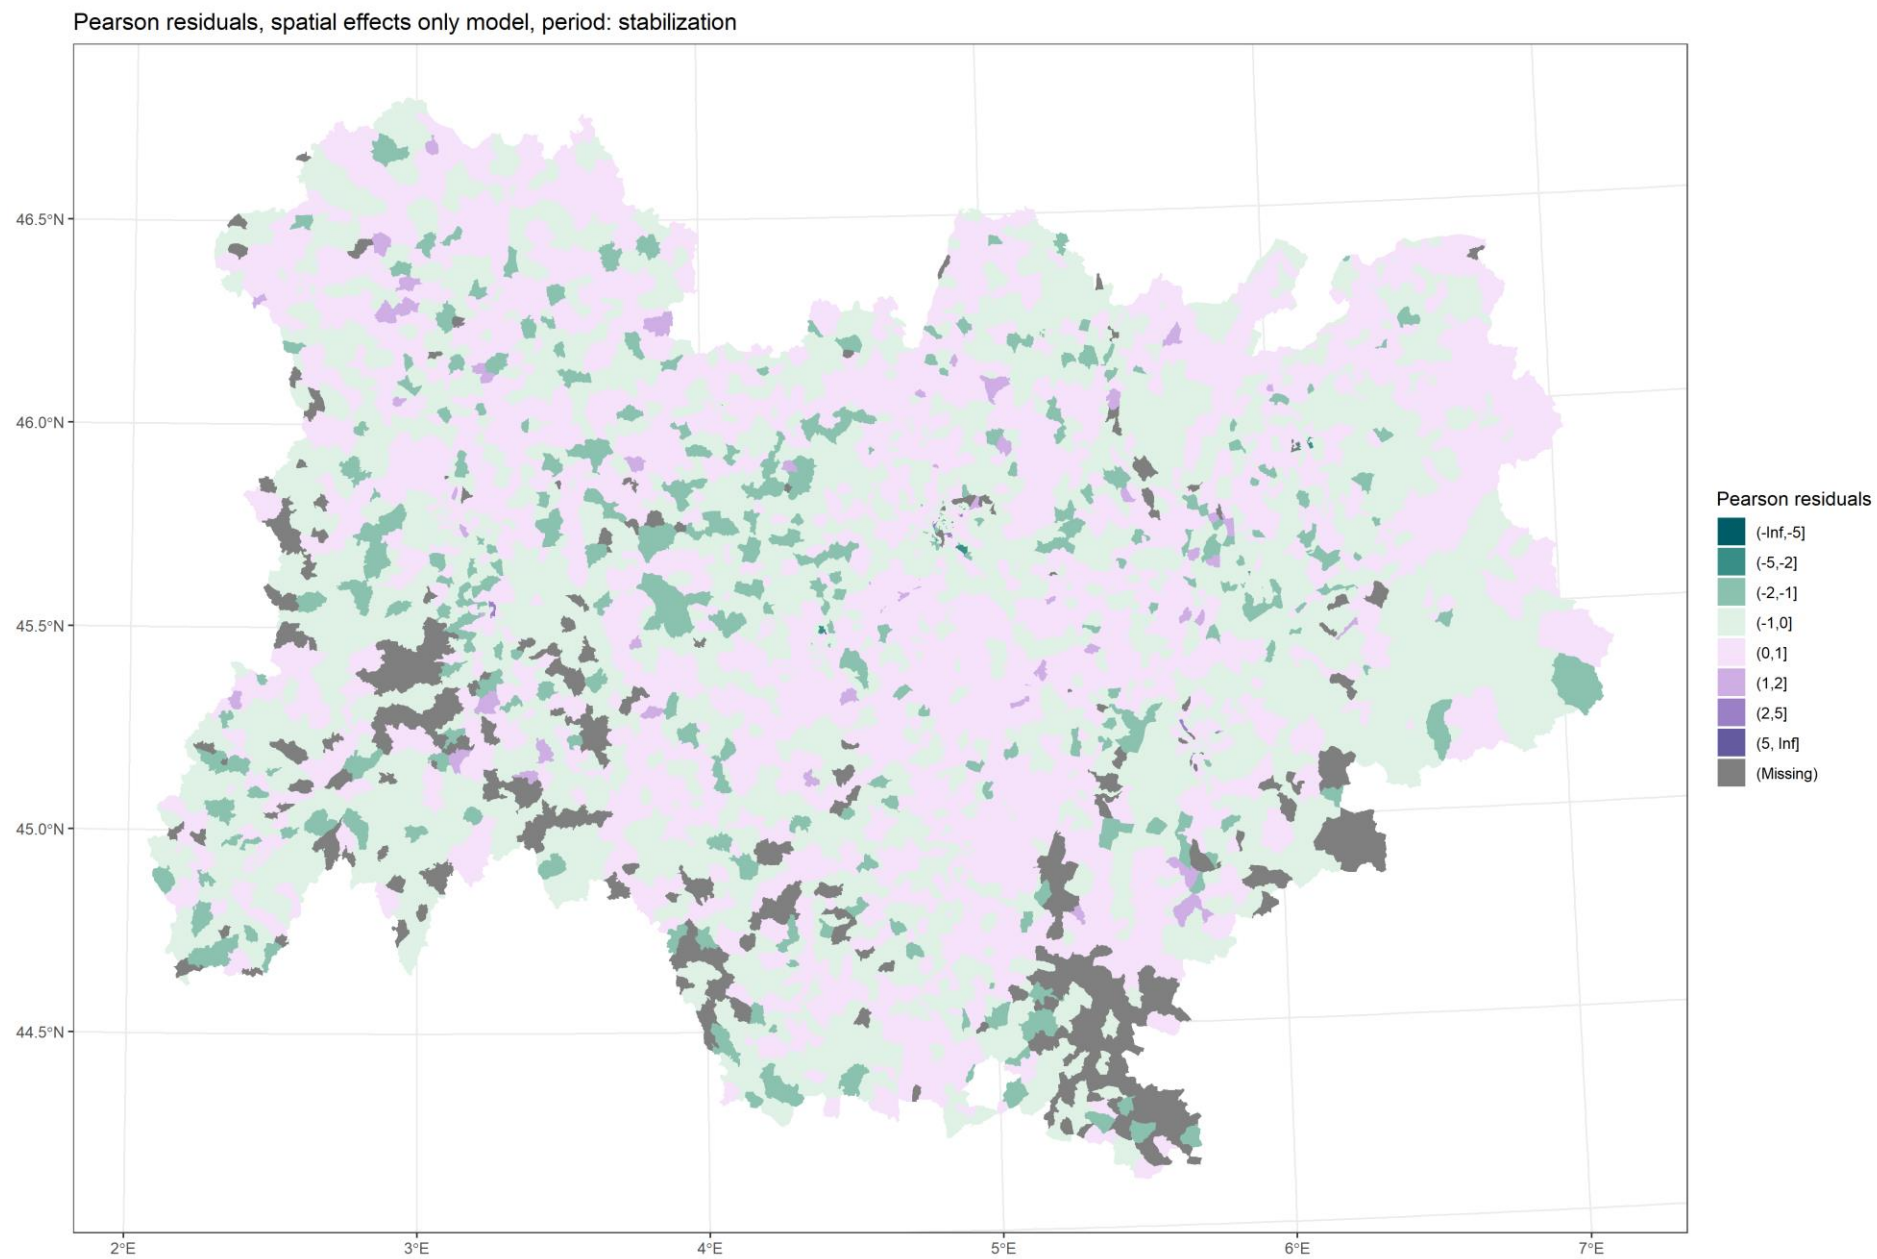

Figure 27 Residuals, M3, stabilization

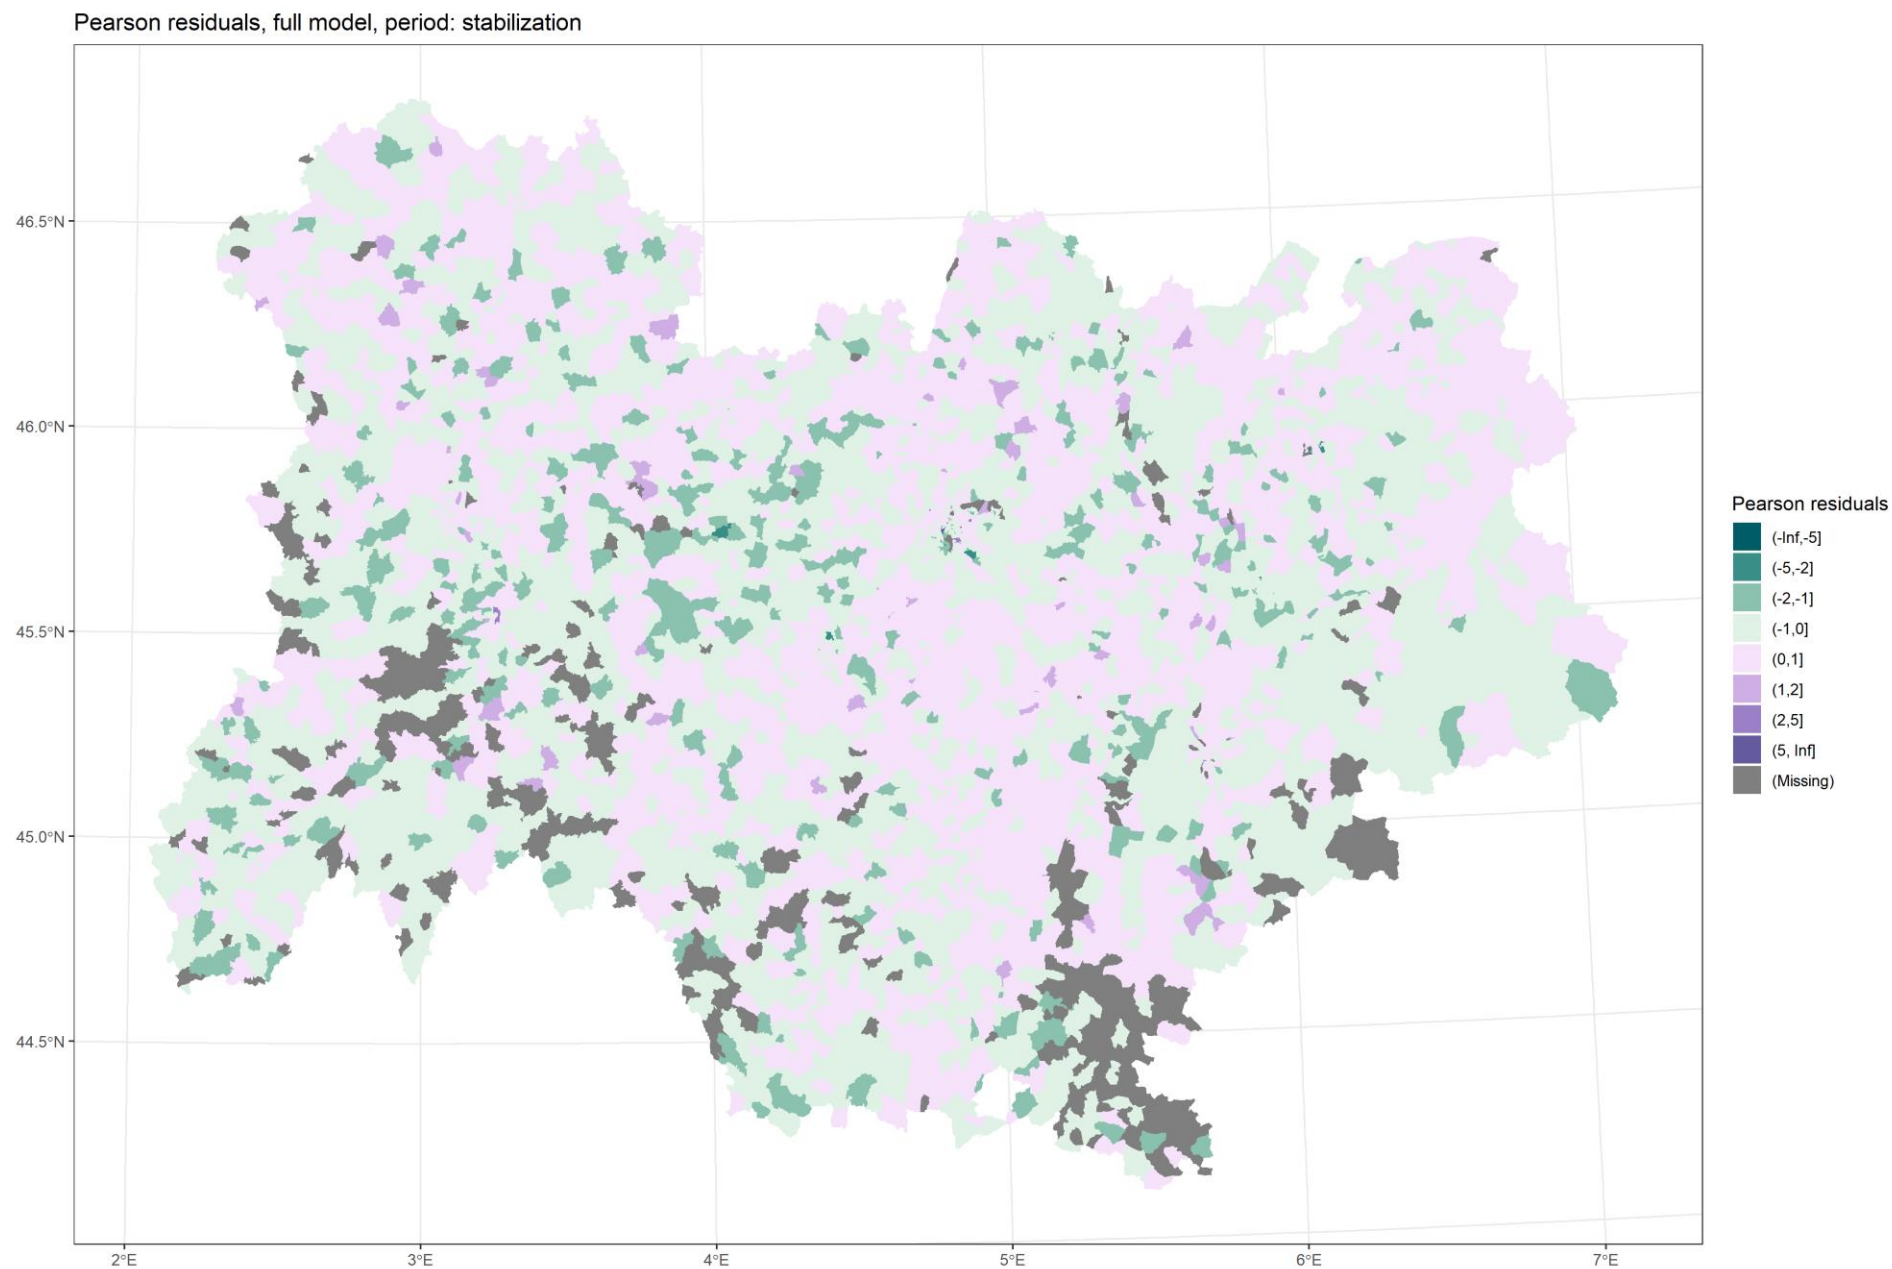

Figure 28 Residuals, M4, stabilization

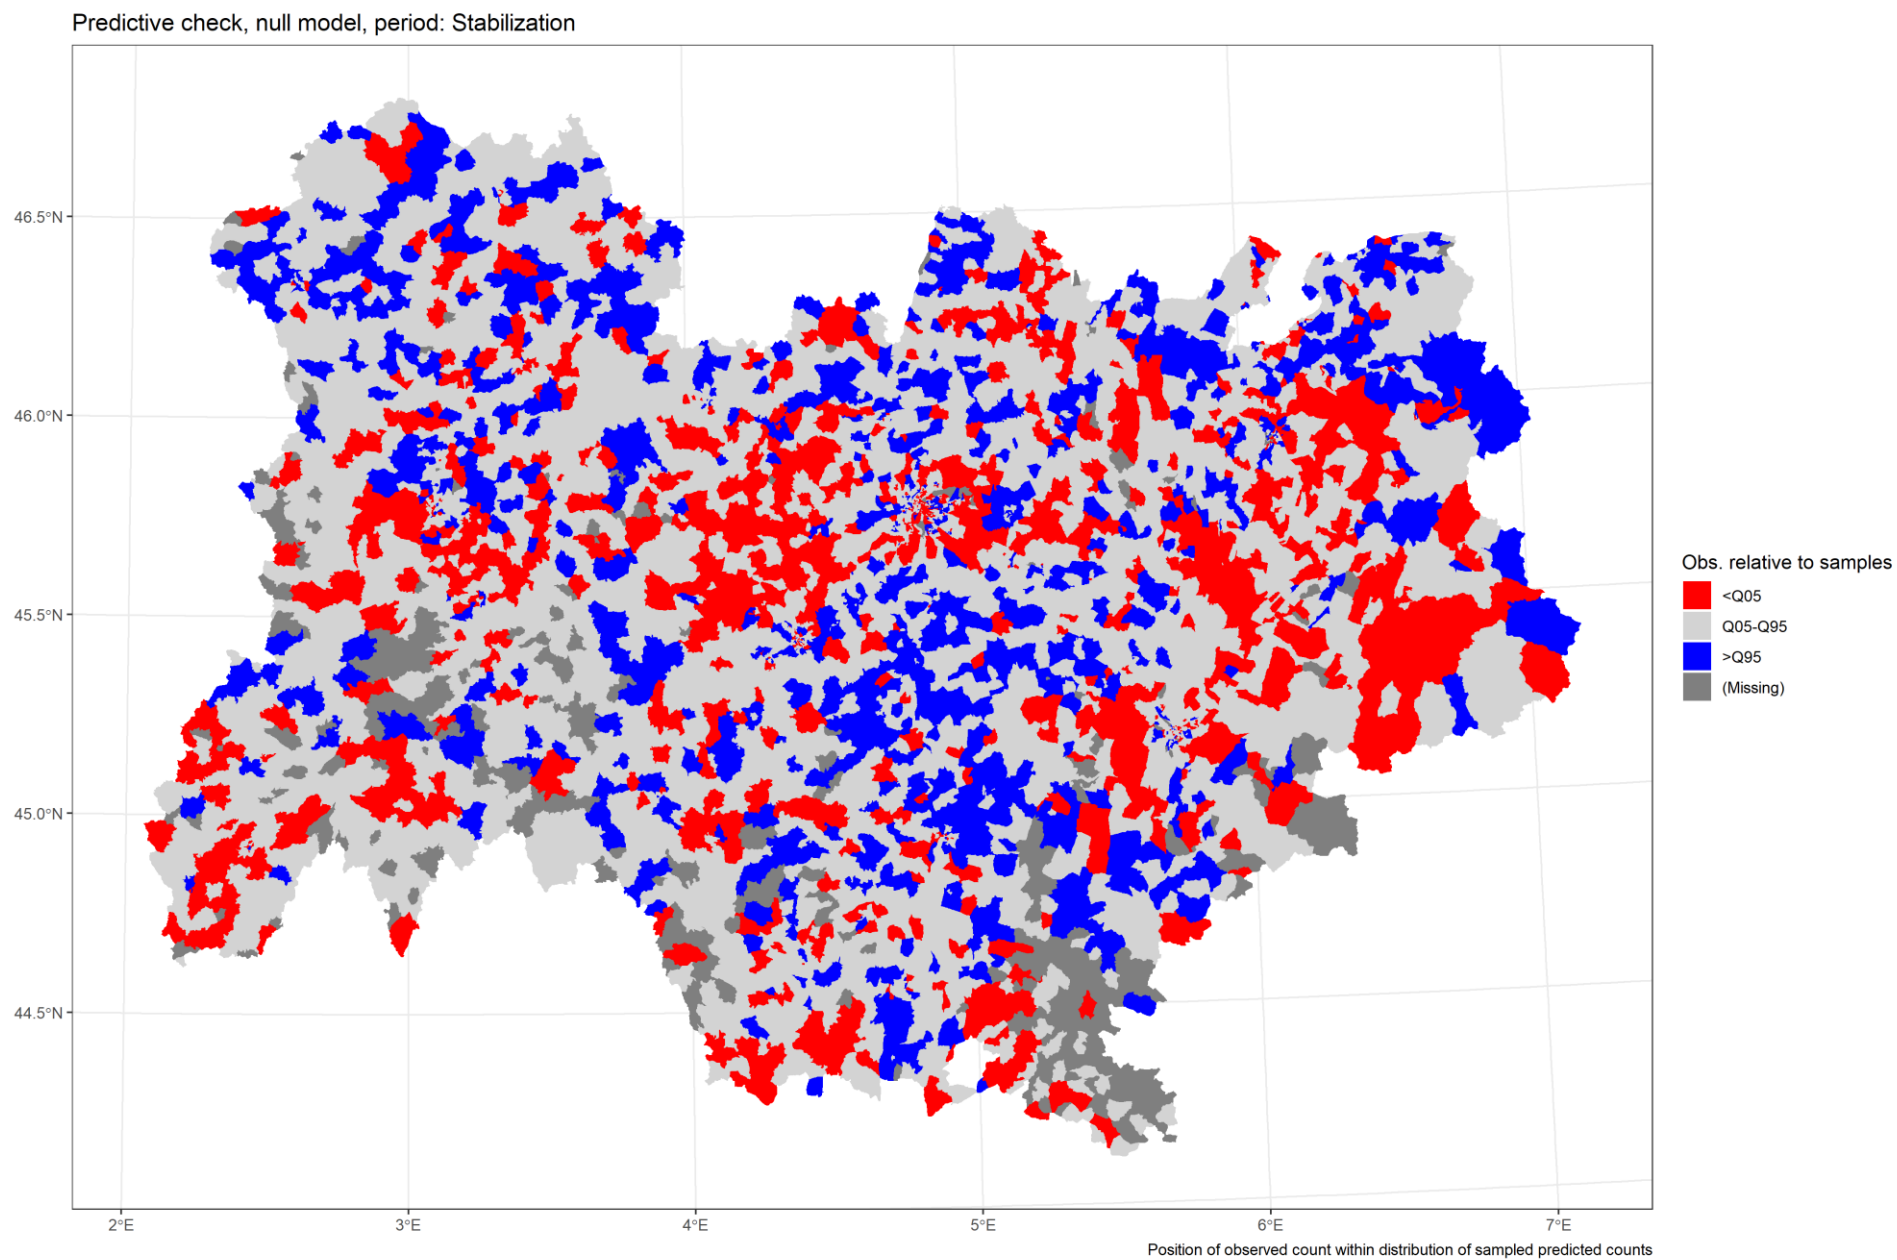

Figure 29 Predictive check, M1, stabilization

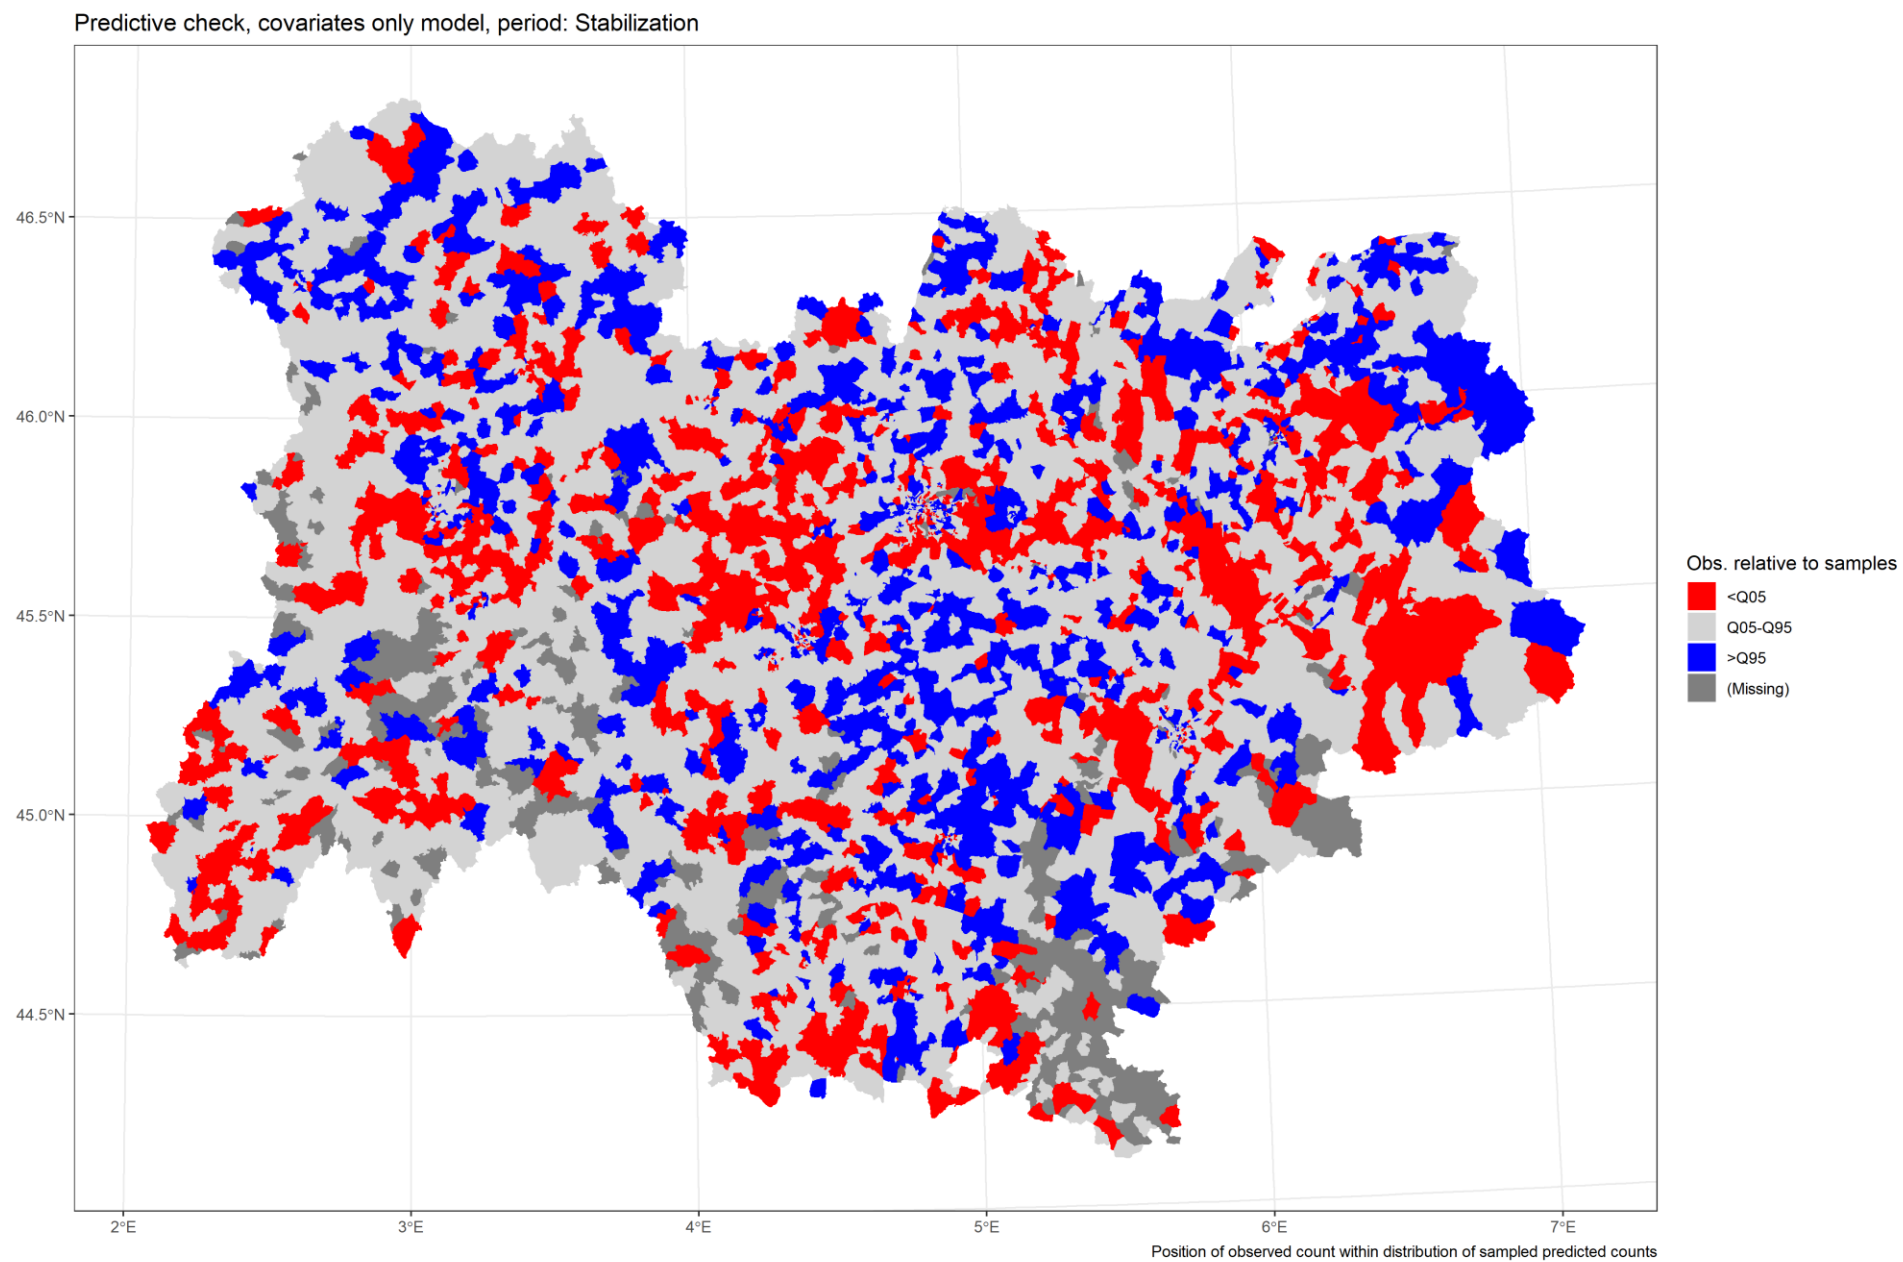

Figure 30 Predictive check, M2, stabilization



Predictive check, spatial effects only model, period: Stabilization

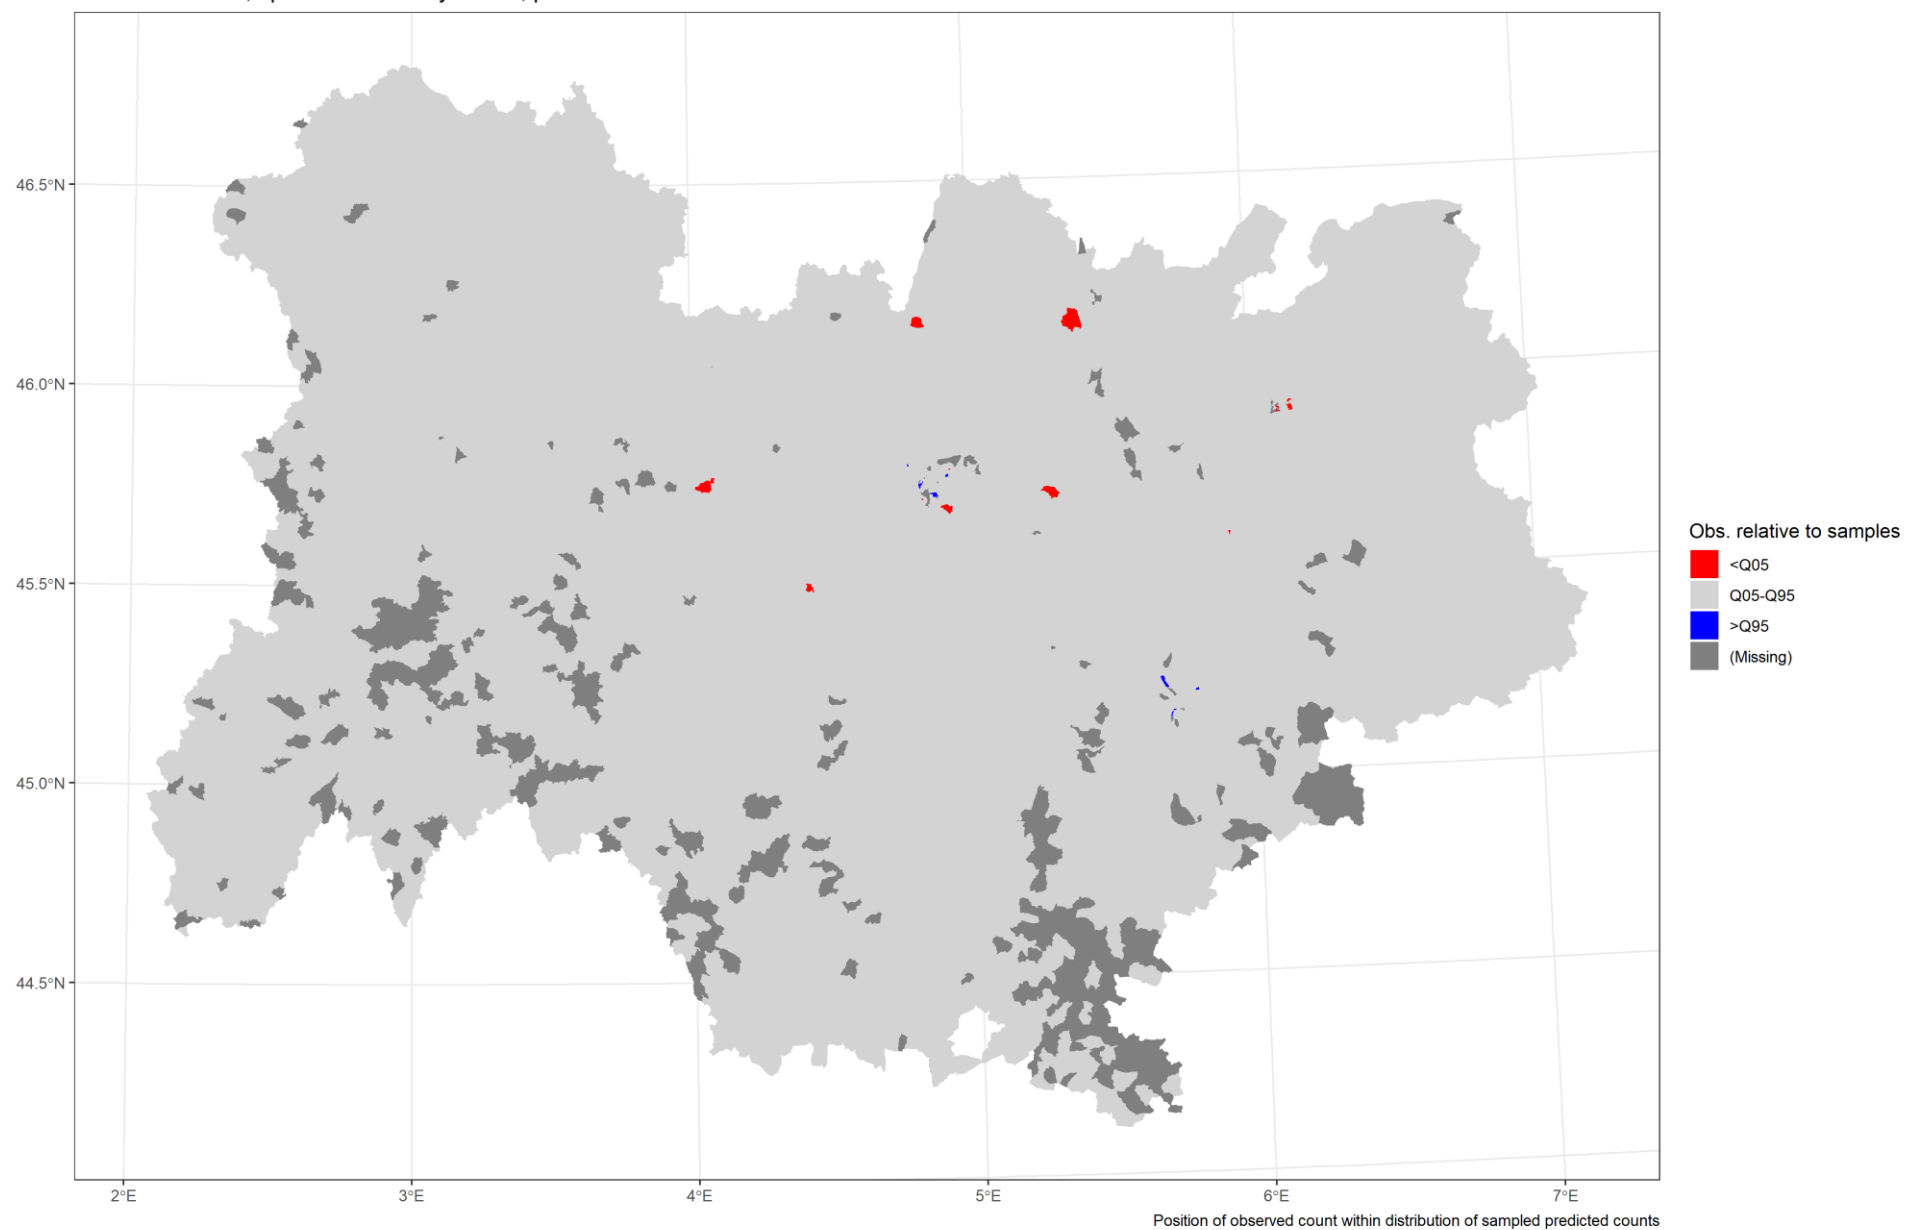

Figure 31 Predictive check, M3, stabilization

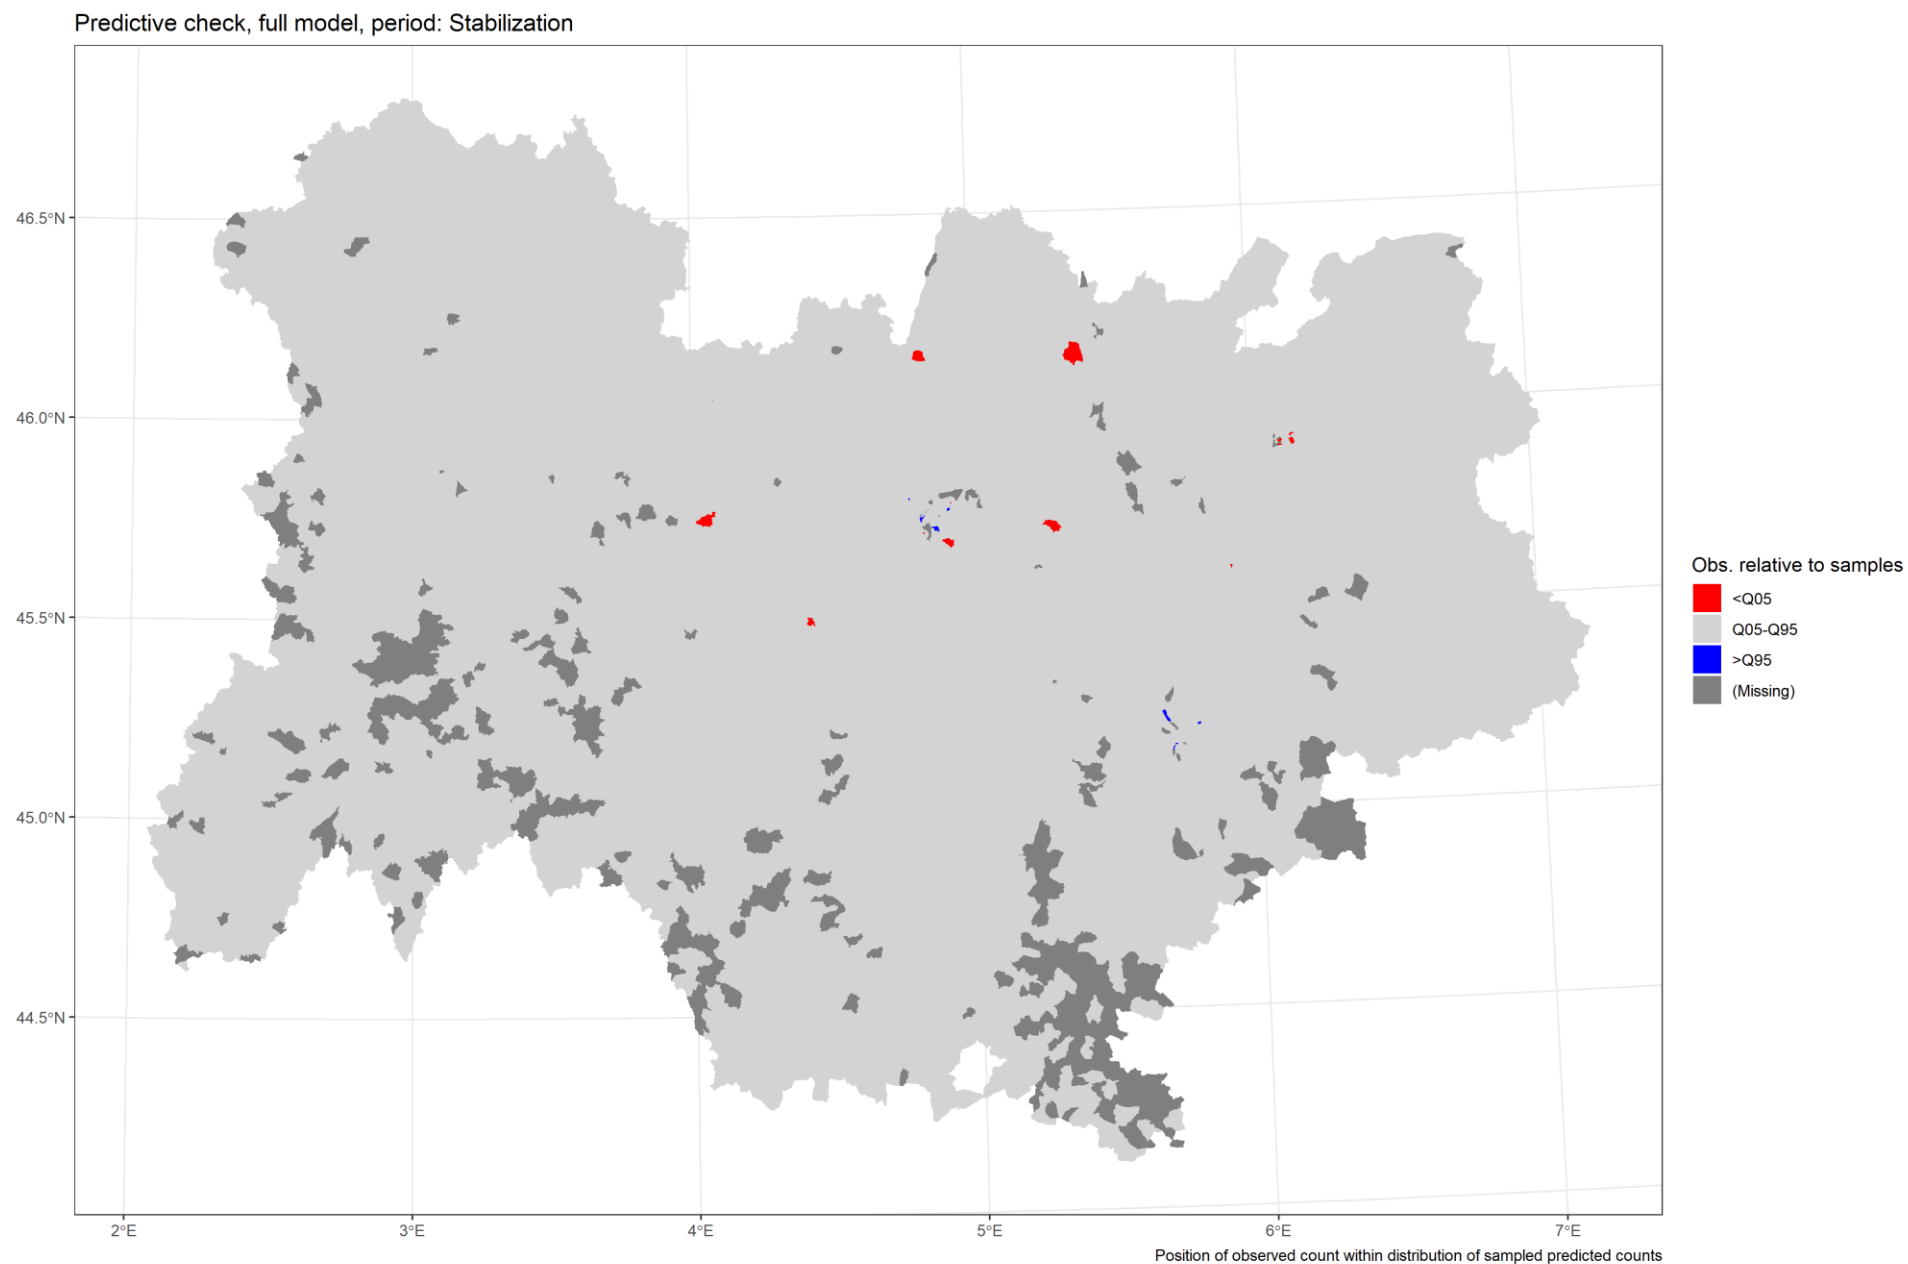

Figure 32 Predictive check, M4, stabilization
