# Supplementary material for: Usefulness of ecological mobility and socio-economic indicators in SARS-CoV-2 infection modelling: a French case study
Source: bioRxiv or medRxiv preprint supplement (doi:10.1101/2024.05.05.24306895), 2024-05-06
Supplement: Supplementary file [file media-1.zip]

## Predicted incidence rates in metropolitan areas

The following maps are focuses on the fourth metropolitan areas within the study region: Clermont-Ferrand, Grenoble, Lyon, Saint-Etienne. These a zoomed in versions of the Figure 1 as displayed in the main article.

|                                                       |   |
|-------------------------------------------------------|---|
| Figure 1 Study region map (in the main article) ..... | 3 |
| Figure 2 Clermont-Ferrand (west) .....                | 4 |
| Figure 3 Grenoble (southeast) .....                   | 5 |
| Figure 4 Lyon (regional capital, centre-east) .....   | 6 |
| Figure 5 Saint-Etienne (southwest of Lyon).....       | 7 |

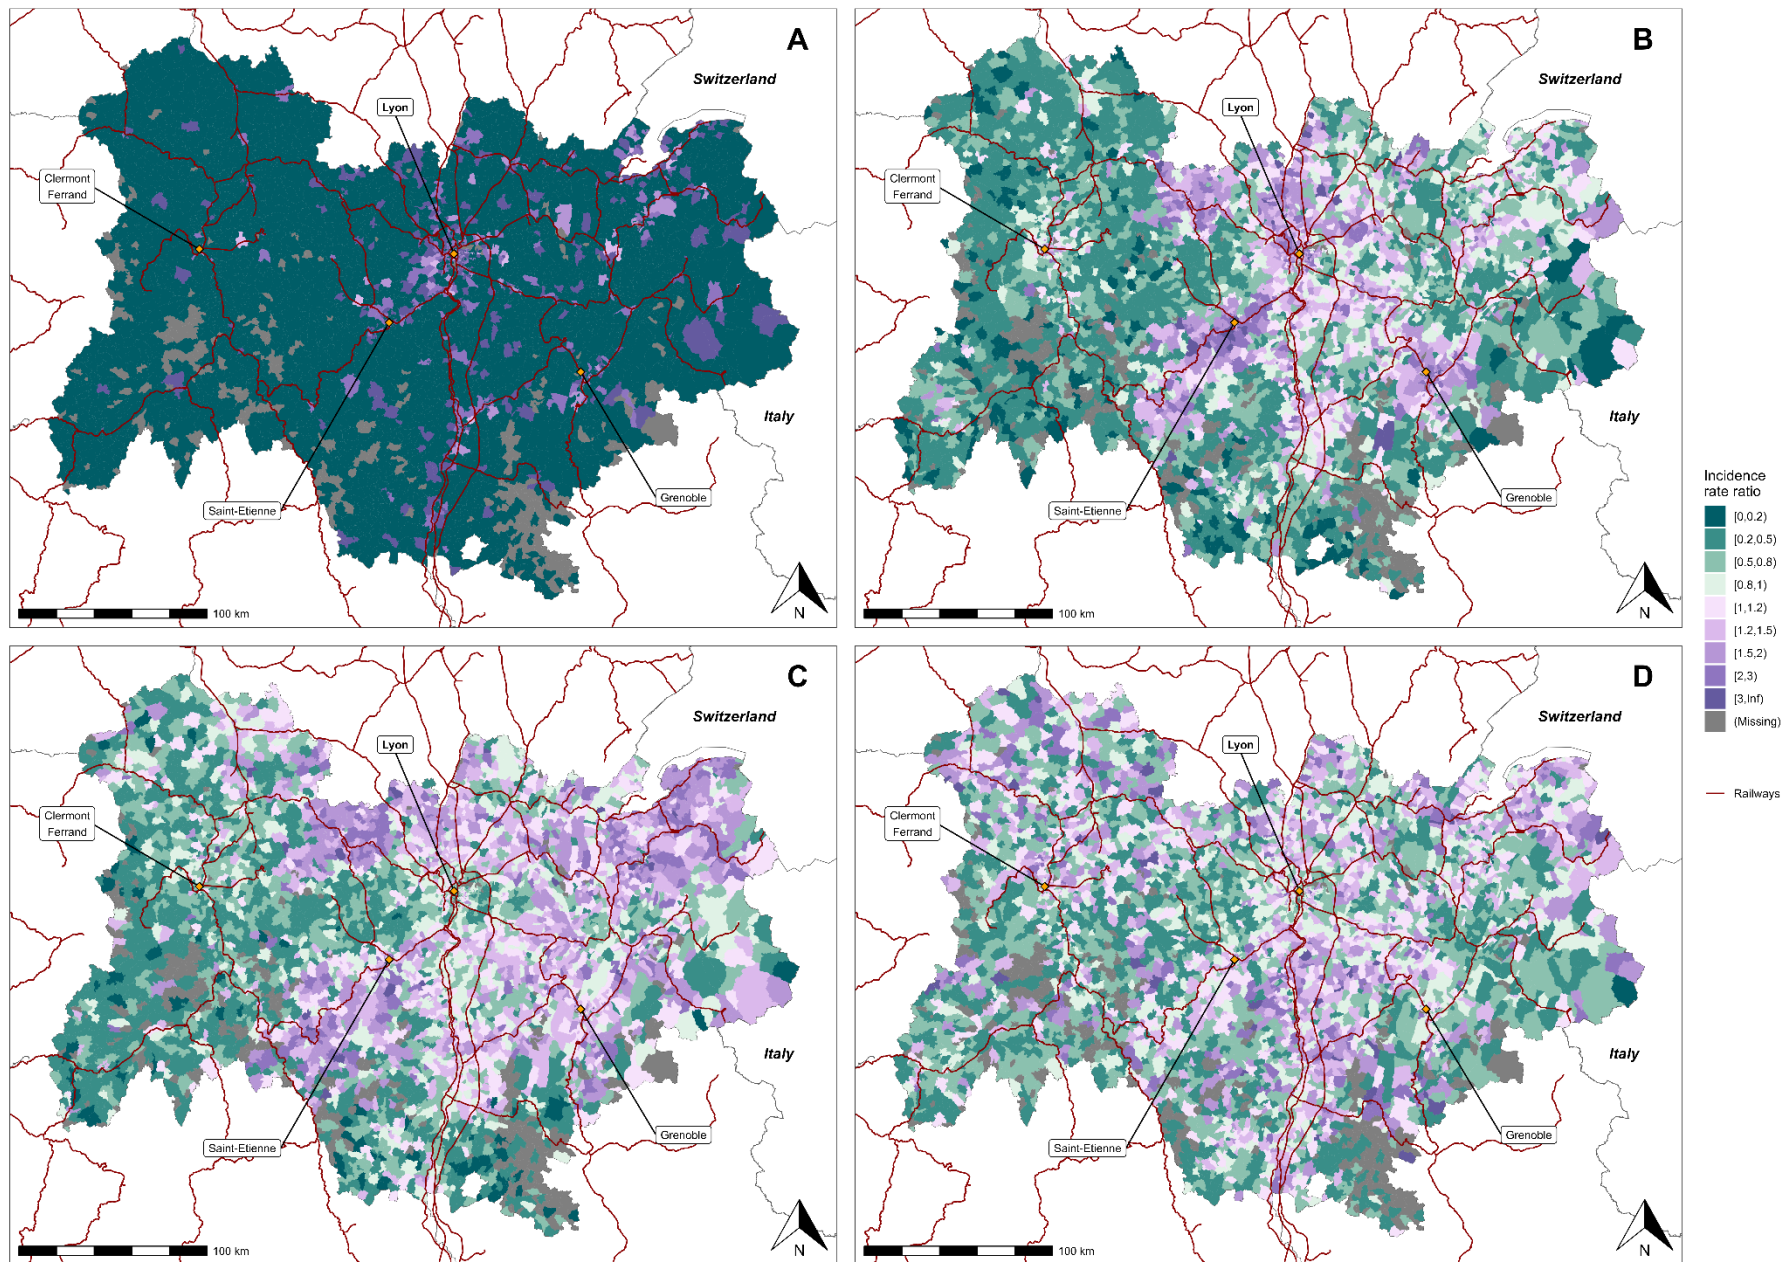

Figure 1 predicted incidence rate ratio of SARS-CoV-2 infection for the IRIS (infra-municipal spatial unit) of the French region Auvergne-Rhône-Alpes during the second epidemic wave: model with covariates and spatial effect (M4). From A to D: Low incidence, Growth, Peak and decrease, and Stabilization periods (in the main article)

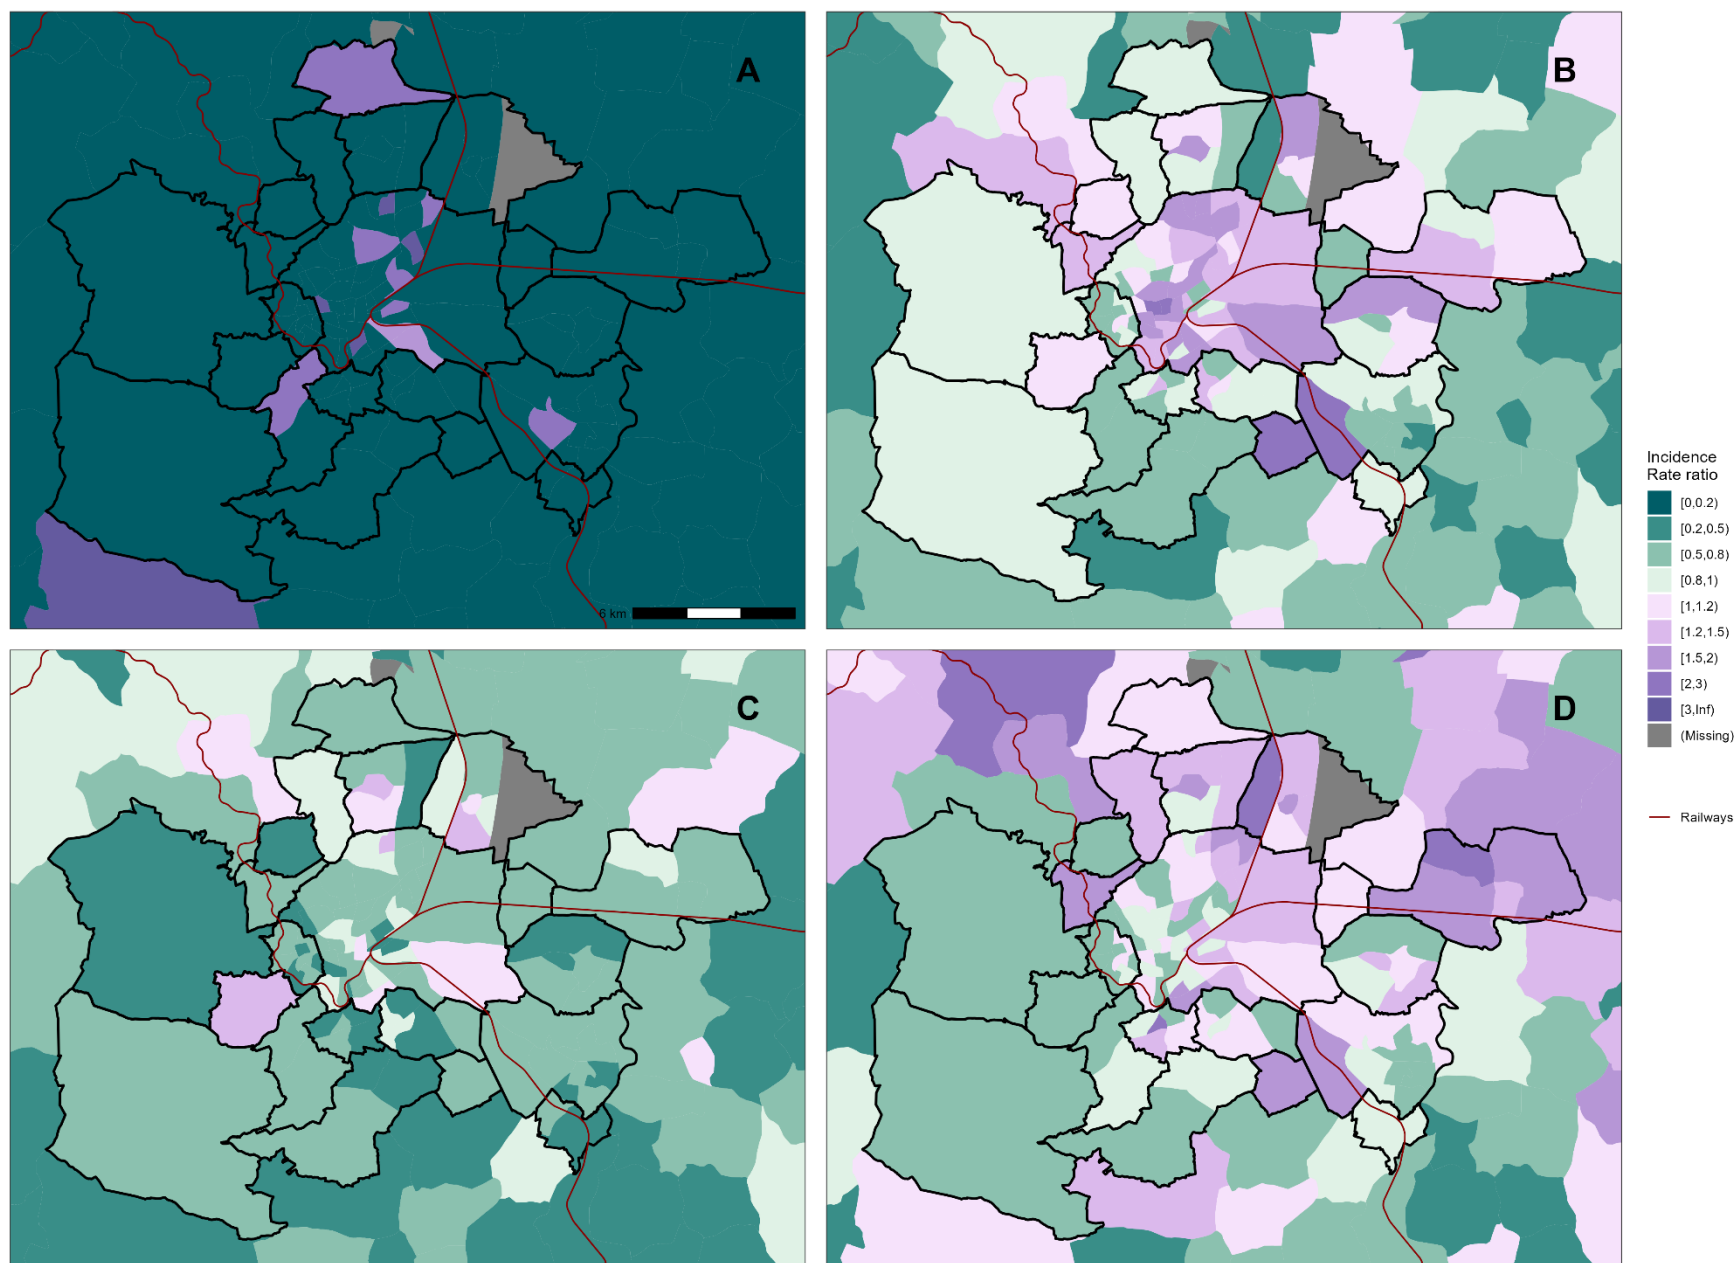

Figure 2 predicted incidence rate ratio of SARS-CoV-2 infection for the IRIS (infra-municipal spatial unit) of the metropolitan area of Clermont-Ferrand during the second epidemic wave: model with covariates and spatial effect (M4). From A to D: Low incidence, Growth, Peak and decrease, and Stabilization periods

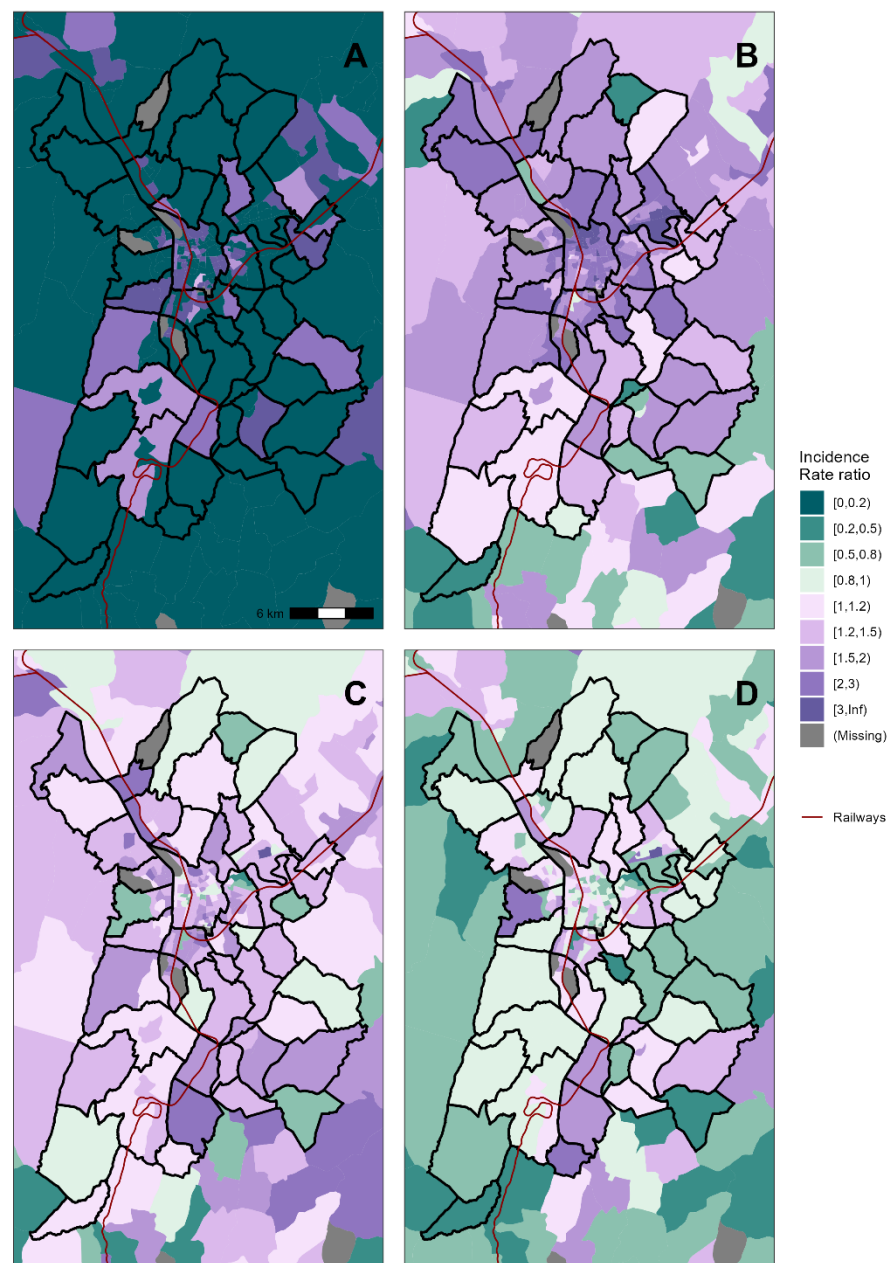

Figure 3 predicted incidence rate ratio of SARS-CoV-2 infection for the IRIS (infra-municipal spatial unit) of the metropolitan area of Grenoble during the second epidemic wave: model with covariates and spatial effect (M4). From A to D: Low incidence, Growth, Peak and decrease, and Stabilization periods



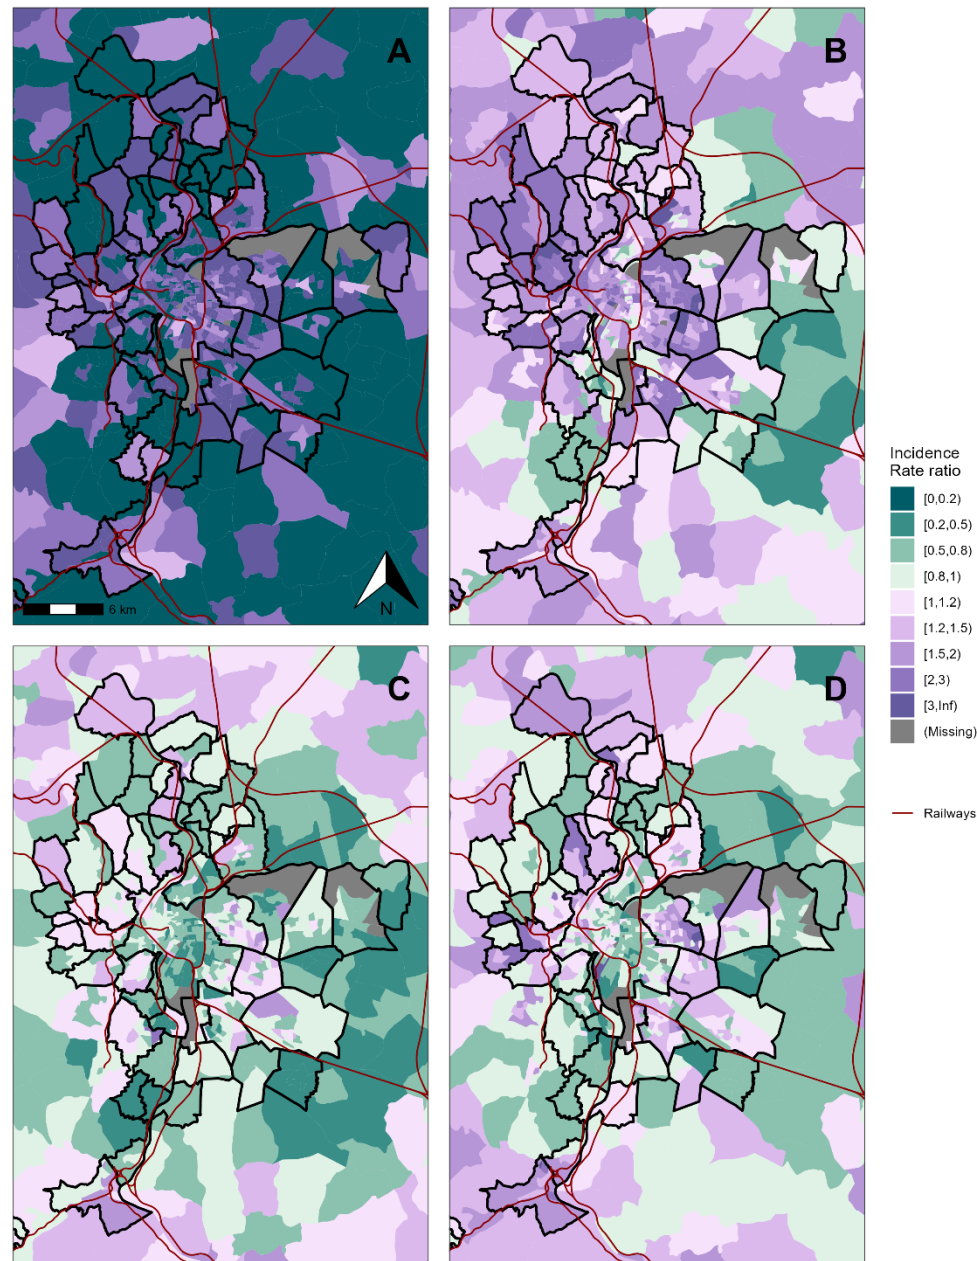

Figure 4 predicted incidence rate ratio of SARS-CoV-2 infection for the IRIS (infra-municipal spatial unit) of the metropolitan area of Lyon during the second epidemic wave: model with covariates and spatial effect (M4). From A to D: Low incidence, Growth, Peak and decrease, and Stabilization periods

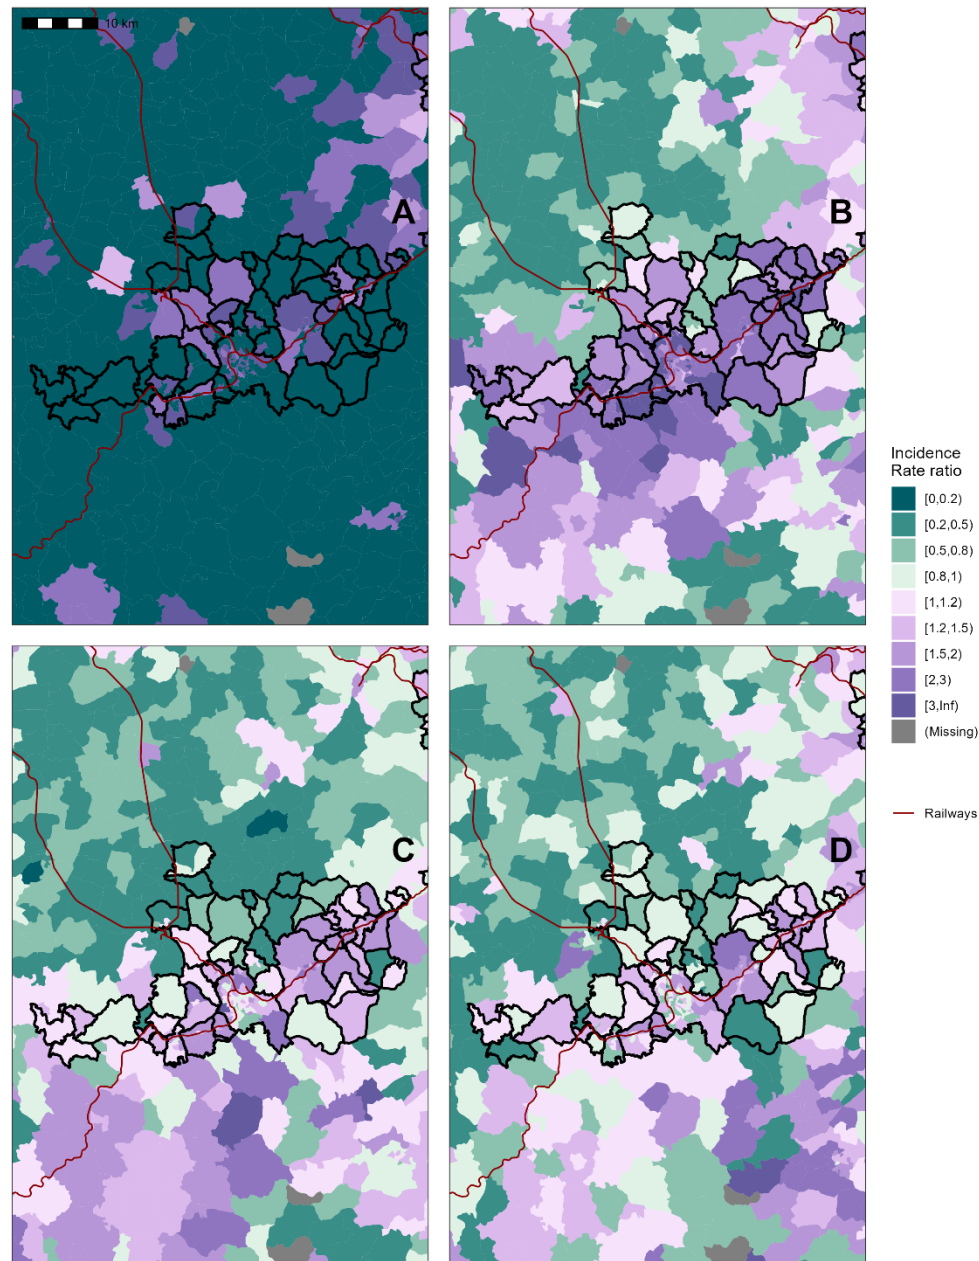

Figure 5 predicted incidence rate ratio of SARS-CoV-2 infection for the IRIS (infra-municipal spatial unit) of the metropolitan area of Saint-Etienne during the second epidemic wave: model with covariates and spatial effect (M4). From A to D: Low incidence, Growth, Peak and decrease, and Stabilization periods
